# Supplementary material for: αO-Conotoxin GeXIVA[1,2] Reduced Neuropathic Pain and Changed Gene Expression in Chronic Oxaliplatin-Induced Neuropathy Mice Model
Source: MDPI journal article supplement (doi:10.3390/md22010049), 2024-01-19
Supplement: s1 [file s1]

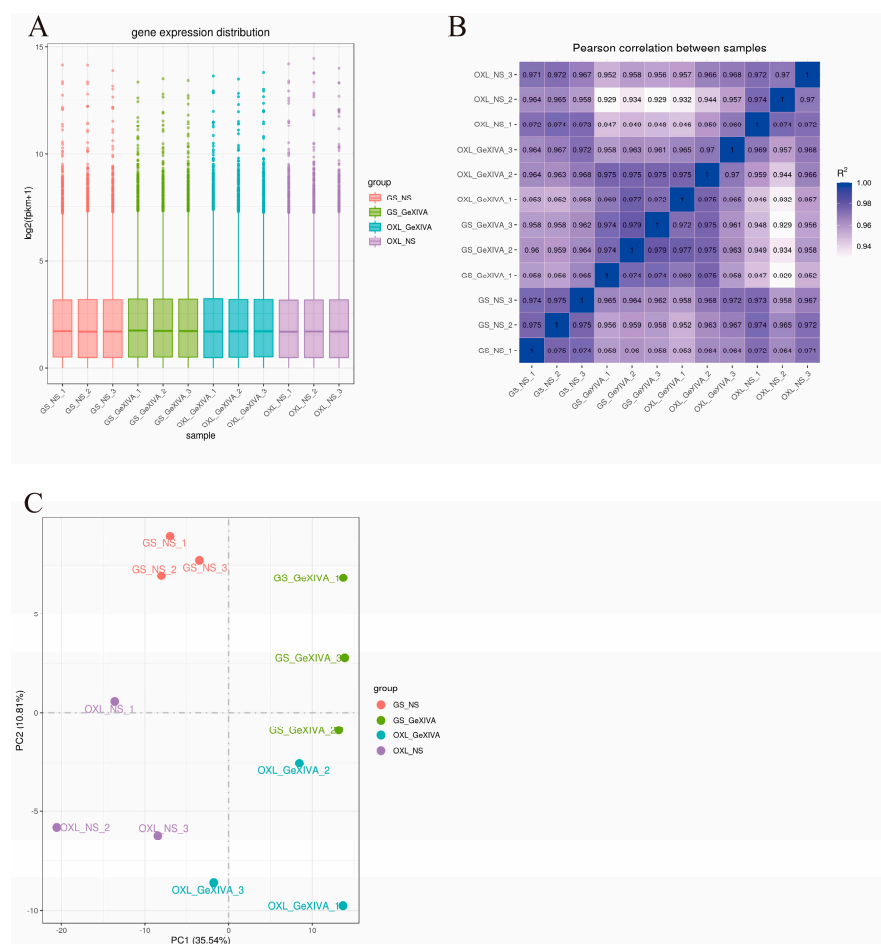

Supplementary Figure S1. RNA-sequencing results. (A) The distribution of gene expression levels in each sample. (B) Heatmap of pearson correlation between samples. (C) Principal component analysis of all samples.
