# Supplementary material for: αO-Conotoxin GeXIVA[1,2] Reduced Neuropathic Pain and Changed Gene Expression in Chronic Oxaliplatin-Induced Neuropathy Mice Model
Source: Mar Drugs. 2024 Jan 19;22(1):49. doi: 10.3390/md22010049 (PMC10821445; doi:10.3390/md22010049)
Supplement: Supplementary file 1 [file marinedrugs-22-00049-s001.zip › Supplementary File S1.xlsx]

## Sheet: OXLNSVSGSNS
gene_id	OXL_NS_1	OXL_NS_2	OXL_NS_3	GS_NS_1	GS_NS_2	GS_NS_3	OXL_NS	GS_NS	log2FoldChange	pvalue	padj	gene_name	gene_chr	gene_start	gene_end	gene_strand	gene_length	gene_biotype	gene_description	tf_family
ENSMUSG00000069045	875.097	1131.13	586.249	0	0	0	864.16	0	12.2342	6.26e-23	3.34e-19	Ddx3y	Y	1260771	1286629	-	5199	protein_coding	- && - && PF00271:Helicase conserved C-terminal domain|PF00270:DEAD/DEAH box helicase	DEAD
ENSMUSG00000069049	203.202	248.725	191.366	0	0	0	214.431	0	10.2233	1.43e-17	3.81e-14	Eif2s3y	Y	1010543	1028847	+	4161	protein_coding	- && Q9Z0N2.2 RecName: Full=Eukaryotic translation initiation factor 2 subunit 3, Y-linked; AltName: Full=Eukaryotic translation initiation factor 2 subunit gamma, Y-linked; Short=eIF-2-gamma Y; AltName: Full=Spermatogonial proliferation factor; Short=Spy && -	-
ENSMUSG00000056673	187.886	241.501	159.978	0	0	0	196.455	0	10.0969	4.44e-17	9.32e-14	Kdm5d	Y	897788	956786	+	15164	protein_coding	- && - && -	-
ENSMUSG00000068457	207.287	231.181	149.853	0	0	0	196.107	0	10.0943	4.66e-17	9.32e-14	Uty	Y	1096861	1245759	-	9791	protein_coding	- && P79457.2 RecName: Full=Histone demethylase UTY; AltName: Full=Male-specific histocompatibility antigen H-YDB; AltName: Full=Ubiquitously transcribed TPR protein on the Y chromosome; AltName: Full=Ubiquitously transcribed Y chromosome tetratricopeptide repeat protein && PF13414:TPR repeat|PF02373:JmjC domain, hydroxylase	JmjC
ENSMUSG00000066363	6.1267	34.0578	71.8889	0	0	0	37.3578	0	7.70246	3.38e-05	0.00915884	Serpina3f	12	104180803	104187388	+	2290	protein_coding	- && Q80X76.3 RecName: Full=Serine protease inhibitor A3F; Short=Serpin A3F && PF00079:Serpin (serine protease inhibitor)	Serpin
ENSMUSG00000026582	4.08447	93.9171	40.5008	0.904114	0	0	46.1674	0.301371	7.04597	0.000133044	0.0265918	Sele	1	163875803	163885246	+	2912	protein_coding	- && Q00690.1 RecName: Full=E-selectin; AltName: Full=CD62 antigen-like family member E; AltName: Full=Endothelial leukocyte adhesion molecule 1; Short=ELAM-1; AltName: Full=Leukocyte-endothelial cell adhesion molecule 2; Short=LECAM2; AltName: CD_antigen=CD62E; Flags: Precursor && PF00084:Sushi repeat (SCR repeat)|PF00059:Lectin C-type domain	Lectin_C
ENSMUSG00000029380	3.06335	369.476	34.4257	0	4.04422	0	135.655	1.34807	6.66127	0.00517142	0.266859	Cxcl1	5	91039100	91040974	+	1875	protein_coding	- && - && -	-
ENSMUSG00000026580	7.14782	155.84	82.0141	2.71234	0	1.01426	81.6674	1.2422	6.01478	7.18e-05	0.0169776	Selp	1	163942833	163977595	+	4413	protein_coding	- && Q01102.1 RecName: Full=P-selectin; AltName: Full=CD62 antigen-like family member P; AltName: Full=Granule membrane protein 140; Short=GMP-140; AltName: Full=Leukocyte-endothelial cell adhesion molecule 3; Short=LECAM3; AltName: Full=Platelet activation dependent granule-external membrane protein; Short=PADGEM; AltName: CD_antigen=CD62P; Flags: Precursor && PF00084:Sushi repeat (SCR repeat)|P…	Lectin_C
ENSMUSG00000021922	18.3801	54.699	36.4507	1.80823	1.01105	0	36.5099	0.939761	5.23659	1.25e-07	9.08e-05	Itih4	14	30608433	30624310	+	3690	protein_coding	- && A6X935.2 RecName: Full=Inter alpha-trypsin inhibitor, heavy chain 4; Short=ITI heavy chain H4; Short=ITI-HC4; Short=Inter-alpha-inhibitor heavy chain 4; Flags: Precursor && PF00092:von Willebrand factor type A domain|PF06668:Inter-alpha-trypsin inhibitor heavy chain C-terminus|PF08487:Vault protein inter-alpha-trypsin domain	VWA
ENSMUSG00000079263	3.06335	10.3206	2.02504	0	0	0	5.13632	0	4.83873	0.00725625	1	Gm6614	6	141917571	141957140	-	2450	protein_coding	- && O88397.2 RecName: Full=Solute carrier organic anion transporter family member 1A5; AltName: Full=Organic anion-transporting polypeptide 3; Short=OATP-3; AltName: Full=Sodium-independent organic anion transporter 3; AltName: Full=Solute carrier family 21 member 7 && PF03137:Organic Anion Transporter Polypeptide (OATP) family|PF07648:Kazal-type serine protease inhibitor domain	-
ENSMUSG00000025383	5.10559	3.09617	6.07512	0	0	0	4.75896	0	4.73014	0.00826065	1	Il23a	10	128132008	128134621	-	2247	protein_coding	- && - && PF16649:Interleukin 23 subunit alpha	-
ENSMUSG00000114469	6.1267	2.06411	6.07512	0	0	0	4.75531	0	4.72919	0.00889853	1	C730002L08Rik	19	20387908	20529694	-	5929	lncRNA	- && - && -	-
novel.114	26.549	1742.11	178.203	47.918	7.07738	19.2709	648.954	24.7554	4.71109	0.00181058	0.153353	-	2	75468724	75473217	-	4494	-	- && P21414.1 RecName: Full=Pol polyprotein; Contains: RecName: Full=Protease; Contains: RecName: Full=Reverse transcriptase/ribonuclease H; Short=RT; Contains: RecName: Full=Integrase; Short=IN && -	-
novel.33	3.06335	4.12822	6.07512	0	0	0	4.42223	0	4.62411	0.0114589	1	-	11	101328031	101333024	-	295	-	- && - && -	-
ENSMUSG00000098198	2.04223	6.19234	4.05008	0	0	0	4.09488	0	4.51248	0.016589	1	Gm9169	3	95051682	95052217	+	536	processed_pseudogene	- && Q3MHL8.1 RecName: Full=Small acidic protein && -	-
novel.55	32.6757	1946.46	294.643	40.6851	20.2211	40.5702	757.925	33.8255	4.48562	0.000845076	0.100207	-	13	55332261	55336961	-	4701	-	- && P31792.1 RecName: Full=Pol polyprotein; Contains: RecName: Full=Reverse transcriptase/ribonuclease H; Short=RT; Contains: RecName: Full=Integrase; Short=IN && -	-
ENSMUSG00000059741	17.359	5.16028	0	0.904114	0	0	7.50642	0.301371	4.42512	0.0108607	1	Myl3	9	110570929	110598866	+	2044	protein_coding	- && P09542.4 RecName: Full=Myosin light chain 3; AltName: Full=Myosin alkali light chain 1, ventricular/slow skeletal muscle isoform; AltName: Full=Myosin light chain 1, slow-twitch muscle B/ventricular isoform; Short=MLC1SB && -	-
ENSMUSG00000049723	4.08447	7.22439	0	0	0	0	3.76962	0	4.39243	0.0357846	1	Mmp12	9	7344381	7369499	+	7237	protein_coding	- && P34960.3 RecName: Full=Macrophage metalloelastase; Short=MME; AltName: Full=Matrix metalloproteinase-12; Short=MMP-12; Flags: Precursor && PF01471:Putative peptidoglycan binding domain|PF00413:Matrixin	PG_binding_1
ENSMUSG00000099876	4.08447	4.12822	3.03756	0	0	0	3.75008	0	4.38578	0.0219144	1	Gm29650	Y	1048393	1049134	+	742	lncRNA	- && - && -	-
ENSMUSG00000075072	1.02112	6.19234	3.03756	0	0	0	3.417	0	4.25113	0.0354133	1	Olfr48	2	89672137	89678549	-	3910	protein_coding	- && - && PF13853:Olfactory receptor	-
ENSMUSG00000092827	0	4.12822	6.07512	0	0	0	3.40111	0	4.24531	0.0486028	1	Mir3091	2	179899329	179899404	+	76	miRNA	- && - && -	-
ENSMUSG00000110803	4.08447	1.03206	5.0626	0	0	0	3.39304	0	4.24244	0.0353526	1	Gm20275	9	59733540	59848360	-	1387	lncRNA	- && - && -	-
ENSMUSG00000079505	9.19005	4.12822	6.07512	0	1.01105	0	6.46446	0.337018	4.21006	0.00912795	1	Gm11131	17	35595997	35599268	-	3122	lncRNA	- && P01901.1 RecName: Full=H-2 class I histocompatibility antigen, K-B alpha chain; Short=H-2K(B); Flags: Precursor && -	-
ENSMUSG00000106815	3.06335	2.06411	4.05008	0	0	0	3.05918	0	4.09266	0.0456656	1	Gm43658	5	76445447	76449622	-	4176	TEC	- && - && -	-
ENSMUSG00000115553	3.06335	7.22439	5.0626	0	0	1.01426	5.11678	0.338085	3.87214	0.0228434	1	Gm49124	14	45802988	45823577	+	440	lncRNA	- && - && -	-
ENSMUSG00000097716	5.10559	4.12822	6.07512	0	0	1.01426	5.10298	0.338085	3.86891	0.0222131	1	1700026J14Rik	6	48513516	48514408	-	794	lncRNA	- && - && -	-
ENSMUSG00000073716	12.2534	8.25645	8.10015	0	1.01105	1.01426	9.53667	0.675103	3.86183	0.00413669	1	Gm13241	4	146559789	146560568	+	780	processed_pseudogene	- && - && PF15359:Carnitine deficiency-associated protein 3	-
ENSMUSG00000064057	21.4435	89.7889	63.7887	7.23291	2.02211	3.04277	58.3403	4.09926	3.8063	1.47e-09	1.57e-06	Scgb3a1	11	49554437	49555945	+	598	protein_coding	- && Q920D7.1 RecName: Full=Secretoglobin family 3A member 1; AltName: Full=Cytokine HIN-1; AltName: Full=High in normal 1; AltName: Full=Pneumo secretory protein 2; Short=PnSP-2; AltName: Full=Uteroglobin-related protein 2; Flags: Precursor && -	-
ENSMUSG00000104795	7.14782	6.19234	1.01252	0	1.01105	0	4.78423	0.337018	3.77482	0.0332798	1	Gm42783	3	96631842	96632636	-	795	TEC	- && - && -	-
ENSMUSG00000026285	6.1267	6.19234	2.02504	0	0	1.01426	4.78136	0.338085	3.77405	0.0301082	1	Pdcd1	1	93966027	93980278	-	1933	protein_coding	- && - && PF07686:Immunoglobulin V-set domain	V-set
ENSMUSG00000026822	575.91	1441.78	2030.1	130.192	68.7517	101.426	1349.26	100.123	3.75167	3.45e-11	4.25e-08	Lcn2	2	32274645	32278264	-	2623	protein_coding	- && P11672.1 RecName: Full=Neutrophil gelatinase-associated lipocalin; Short=NGAL; AltName: Full=Lipocalin-2; AltName: Full=SV-40-induced 24P3 protein; AltName: Full=Siderocalin LCN2; AltName: Full=p25; Flags: Precursor && PF00061:Lipocalin / cytosolic fatty-acid binding protein family	-
ENSMUSG00000087112	2.04223	5.16028	6.07512	0	0	1.01426	4.42588	0.338085	3.66334	0.0383874	1	Gm7237	19	33386531	33398042	-	1401	unprocessed_pseudogene	- && Q3YBN2.1 RecName: Full=Tear acid lipase-like protein; Short=TALLP; Flags: Precursor && PF04083:Partial alpha/beta-hydrolase lipase region	-
ENSMUSG00000073598	5.10559	2.06411	6.07512	0	0	1.01426	4.41494	0.338085	3.66038	0.0386007	1	1700066B19Rik	18	35836278	35863922	+	2837	protein_coding	- && - && -	-
ENSMUSG00000027398	3.06335	48.5066	7.08763	2.71234	2.02211	0	19.5525	1.57815	3.60862	0.000900908	1	Il1b	2	129206490	129213059	-	1907	protein_coding	- && P10749.1 RecName: Full=Interleukin-1 beta; Short=IL-1 beta; Flags: Precursor && PF00340:Interleukin-1 / 18|PF02394:Interleukin-1 propeptide	-
ENSMUSG00000118738	3.06335	4.12822	5.0626	0.904114	0	0	4.08472	0.301371	3.54766	0.0475533	1	Gm26243	10	79821340	79821446	+	107	snRNA	- && - && -	-
ENSMUSG00000045502	1.02112	9.2885	12.1502	0	1.01105	1.01426	7.48662	0.675103	3.5075	0.0185283	1	Hcar2	5	124001633	124003562	-	1930	protein_coding	- && - && PF00001:7 transmembrane receptor (rhodopsin family)	7tm_1
ENSMUSG00000035385	4.08447	73.276	1.01252	1.80823	3.03316	3.04277	26.1243	2.62805	3.31615	0.0369964	0.513584	Ccl2	11	81926397	81928279	+	1138	protein_coding	- && - && PF00048:Small cytokines (intecrine/chemokine), interleukin-8 like	-
ENSMUSG00000050370	30.6335	169.257	122.515	13.5617	13.1437	7.09979	107.469	11.2684	3.25131	1.68e-05	0.00537385	Ch25h	19	34451178	34452564	-	1387	protein_coding	- && Q9Z0F5.1 RecName: Full=Cholesterol 25-hydroxylase; AltName: Full=Cholesterol 25-monooxygenase; Short=m25OH && PF04116:Fatty acid hydroxylase superfamily	-
ENSMUSG00000028362	17.359	99.0774	45.5634	9.04114	5.05527	3.04277	53.9999	5.71306	3.22507	2.42e-07	0.000148844	Tnfsf8	4	63749545	63779584	-	3807	protein_coding	- && - && PF00229:TNF(Tumour Necrosis Factor) family	-
ENSMUSG00000028965	2.04223	19.6091	4.05008	0.904114	1.01105	1.01426	8.56713	0.976475	3.13426	0.0173724	1	Tnfrsf9	4	150999019	151030559	+	2722	protein_coding	- && - && PF00020:TNFR/NGFR cysteine-rich region	-
ENSMUSG00000059089	11.2323	28.8976	42.5258	4.52057	4.04422	1.01426	27.5519	3.19301	3.0963	3.61e-05	0.00964313	Fcgr4	1	170846489	170857330	+	1256	protein_coding	- && - && PF13895:Immunoglobulin domain	-
ENSMUSG00000074874	5.10559	7.22439	4.05008	0	0	2.02851	5.46002	0.67617	3.04868	0.0499783	1	Ctla2b	13	61043164	61045261	-	1723	protein_coding	- && - && PF08246:Cathepsin propeptide inhibitor domain (I29)	-
ENSMUSG00000021622	29.6124	4.12822	2.02504	2.71234	1.01105	1.01426	11.9219	1.57922	2.89713	0.0125708	1	Ckmt2	13	92001506	92025004	-	1486	protein_coding	- && Q6P8J7.1 RecName: Full=Creatine kinase S-type, mitochondrial; AltName: Full=Basic-type mitochondrial creatine kinase; Short=Mib-CK; AltName: Full=Sarcomeric mitochondrial creatine kinase; Short=S-MtCK; Flags: Precursor && PF00217:ATP:guanido phosphotransferase, C-terminal catalytic domain|PF02807:ATP:guanido phosphotransferase, N-terminal domain	-
ENSMUSG00000117442	7.14782	51.6028	13.1628	4.52057	1.01105	4.05702	23.9711	3.19622	2.89574	0.000598115	0.0846061	1810073O08Rik	17	84225366	84229035	+	1853	lncRNA	- && - && -	-
ENSMUSG00000056328	32.6757	0	3.03756	1.80823	1.01105	2.02851	11.9044	1.61593	2.8787	0.0227043	1	Myh1	11	67090878	67115401	+	6353	protein_coding	- && - && PF00063:Myosin head (motor domain)|PF01576:Myosin tail|PF02736:Myosin N-terminal SH3-like domain	Myosin_head
ENSMUSG00000026981	5.10559	48.5066	2.02504	5.42468	2.02211	0	18.5458	2.48226	2.87561	0.00768516	1	Il1rn	2	24226865	24241506	+	5535	protein_coding	- && P25085.1 RecName: Full=Interleukin-1 receptor antagonist protein; Short=IL-1RN; Short=IL-1ra; Short=IRAP; AltName: Full=IL1 inhibitor; Flags: Precursor && PF00340:Interleukin-1 / 18	-
ENSMUSG00000037095	190.949	307.553	241.992	39.781	22.2432	42.5987	246.831	34.8743	2.81991	1.41e-26	1.13e-22	Lrg1	17	56426678	56429001	-	1408	protein_coding	- && P02750.2 RecName: Full=Leucine-rich alpha-2-glycoprotein; Short=LRG; Flags: Precursor && PF13855:Leucine rich repeat	-
ENSMUSG00000032487	109.26	572.791	286.543	66.9044	49.5416	26.3706	322.865	47.6056	2.76056	0.000184332	0.0335317	Ptgs2	1	149975782	149983978	+	4580	protein_coding	- && Q05769.1 RecName: Full=Prostaglandin G/H synthase 2; AltName: Full=Cyclooxygenase-2; Short=COX-2; AltName: Full=Glucocorticoid-regulated inflammatory cyclooxygenase; AltName: Full=Gripghs; AltName: Full=Macrophage activation-associated marker protein P71/73; AltName: Full=PES-2; AltName: Full=PHS II; AltName: Full=Prostaglandin H2 synthase 2; Short=PGH synthase 2; Short=PGHS-2; AltName: Full…	An_peroxidase
ENSMUSG00000070025	12.2534	4.12822	3.03756	0	1.01105	2.02851	6.47306	1.01319	2.7067	0.0480484	1	Gm10284	8	58003333	58004337	+	1005	processed_pseudogene	- && P16858.2 RecName: Full=Glyceraldehyde-3-phosphate dehydrogenase; Short=GAPDH; AltName: Full=Peptidyl-cysteine S-nitrosylase GAPDH && PF00044:Glyceraldehyde 3-phosphate dehydrogenase, NAD binding domain|PF02800:Glyceraldehyde 3-phosphate dehydrogenase, C-terminal domain	-
novel.51	8.16894	12.3847	5.0626	0	4.04422	0	8.53874	1.34807	2.69004	0.0298032	1	-	13	112237405	112238214	+	404	-	- && - && -	-
ENSMUSG00000079014	10.2112	12.3847	23.2879	1.80823	3.03316	3.04277	15.2946	2.62805	2.55097	0.0027252	1	Serpina3i	12	104229381	104235631	+	2224	protein_coding	- && - && PF00079:Serpin (serine protease inhibitor)	Serpin
ENSMUSG00000087249	7.14782	12.3847	11.1377	1.80823	2.02211	2.02851	10.2234	1.95295	2.39025	0.0153404	1	Gm16062	11	59700906	59709317	+	771	lncRNA	- && - && -	-
ENSMUSG00000090364	11.2323	22.7052	6.07512	0.904114	3.03316	4.05702	13.3375	2.66477	2.34037	0.0108123	1	Gm3043	14	18771773	18780990	-	821	protein_coding	- && - && PF04822:Takusan	-
ENSMUSG00000068396	341.053	483.002	163.016	82.2744	53.5859	67.9551	329.024	67.9385	2.27487	2.06e-06	0.000869902	Rpl34-ps1	6	71101594	71101947	+	354	processed_pseudogene	- && Q9D1R9.2 RecName: Full=60S ribosomal protein L34 && PF01199:Ribosomal protein L34e	-
ENSMUSG00000046223	9.19005	43.3464	16.2003	3.61646	5.05527	6.08553	22.9122	4.91909	2.22511	0.00229466	0.177178	Plaur	7	24161909	24175393	+	2617	protein_coding	- && P35456.1 RecName: Full=Urokinase plasminogen activator surface receptor; Short=U-PAR; Short=uPAR; AltName: CD_antigen=CD87; Flags: Precursor && PF00021:u-PAR/Ly-6 domain	-
ENSMUSG00000097194	7.14782	8.25645	7.08763	0.904114	2.02211	2.02851	7.4973	1.65158	2.19562	0.047664	1	9330175E14Rik	8	95149526	95161731	-	5938	lncRNA	- && - && -	-
ENSMUSG00000037405	95.985	243.565	148.84	42.4934	31.3427	36.5132	162.797	36.7831	2.14304	1.79e-11	2.39e-08	Icam1	9	20927281	20940113	+	4360	protein_coding	- && - && PF03921:Intercellular adhesion molecule (ICAM), N-terminal domain	-
ENSMUSG00000097635	11.2323	5.16028	9.11267	2.71234	2.02211	1.01426	8.50175	1.91624	2.13821	0.0418119	1	Gm26826	6	122790578	122797573	-	1395	lncRNA	- && - && -	-
ENSMUSG00000053113	49.0136	210.539	98.2144	27.1234	25.2764	30.4277	119.256	27.6091	2.11076	2.31e-07	0.000147631	Socs3	11	117856905	117860873	-	2891	protein_coding	- && O35718.1 RecName: Full=Suppressor of cytokine signaling 3; Short=SOCS-3; AltName: Full=Cytokine-inducible SH2 protein 3; Short=CIS-3; AltName: Full=Protein EF-10 && -	-
ENSMUSG00000030474	6.1267	26.8335	23.2879	5.42468	3.03316	5.07128	18.7494	4.50971	2.05089	0.00689812	1	Siglece	7	43300494	43309585	-	1849	protein_coding	- && - && -	-
ENSMUSG00000071714	12.2534	71.2119	47.5884	15.3699	4.04422	12.1711	43.6846	10.5284	2.04493	0.000650084	0.08745	Csf2rb2	15	78166707	78189921	-	4740	protein_coding	- && - && -	-
ENSMUSG00000031803	39.8236	104.238	72.9014	15.3699	22.2432	17.2423	72.3209	18.2852	1.98662	1.35e-06	0.000635126	B3gnt3	8	72143400	72154433	-	3055	protein_coding	- && Q5JCS9.1 RecName: Full=N-acetyllactosaminide beta-1,3-N-acetylglucosaminyltransferase 3; AltName: Full=Core 1 extending beta-1,3-N-acetylglucosaminyltransferase; AltName: Full=Core1-beta3GlcNAcT; AltName: Full=UDP-GlcNAc:betaGal beta-1,3-N-acetylglucosaminyltransferase 3; Short=BGnT-3; Short=Beta-1,3-Gn-T3; Short=Beta-1,3-N-acetylglucosaminyltransferase 3; Short=Beta3Gn-T3 && PF01762:Galacto…	Galactosyl_T
ENSMUSG00000086029	8.16894	14.4488	7.08763	3.61646	1.01105	3.04277	9.90179	2.55676	1.94229	0.0424696	1	Pax6os1	2	105366425	105500675	-	1619	lncRNA	- && Q5R7Y8.3 RecName: Full=60S ribosomal protein L8 && -	-
ENSMUSG00000031304	22.4646	50.5707	24.3005	14.4658	8.08843	3.04277	32.4453	8.53234	1.91192	0.00132995	0.127831	Il2rg	X	100307984	100311861	-	2387	protein_coding	- && - && PF00041:Fibronectin type III domain|PF09240:Interleukin-6 receptor alpha chain, binding	fn3
ENSMUSG00000051439	51.0559	334.386	275.405	55.151	42.4643	79.1119	220.282	58.9091	1.90292	0.0130576	0.402747	Cd14	18	36858120	36859851	-	1732	protein_coding	- && - && -	-
ENSMUSG00000086017	9.19005	10.3206	11.1377	5.42468	1.01105	2.02851	10.2161	2.82142	1.83384	0.0491971	1	Gm11872	4	20343706	20347818	+	2219	lncRNA	- && - && -	-
ENSMUSG00000026175	14.2956	16.5129	18.2253	8.13703	4.04422	2.02851	16.3446	4.73658	1.76973	0.0162913	1	Vil1	1	74448535	74474718	+	3551	protein_coding	- && Q62468.3 RecName: Full=Villin-1 && PF00626:Gelsolin repeat|PF02209:Villin headpiece domain	-
ENSMUSG00000027399	10.2112	54.699	4.05008	8.13703	9.09949	3.04277	22.9867	6.75976	1.76144	0.0296905	0.481222	Il1a	2	129141530	129151892	-	1974	protein_coding	- && P01582.1 RecName: Full=Interleukin-1 alpha; Short=IL-1 alpha; Flags: Precursor && PF00340:Interleukin-1 / 18|PF02394:Interleukin-1 propeptide	-
ENSMUSG00000026068	6.1267	21.6732	12.1502	4.52057	5.05527	3.04277	13.3167	4.2062	1.66011	0.0415313	1	Il18rap	1	40554522	40590865	+	6752	protein_coding	- && - && -	-
ENSMUSG00000113647	14.2956	15.4808	12.1502	3.61646	5.05527	5.07128	13.9756	4.581	1.61413	0.0306339	1	Gm47210	13	93907458	93908702	-	1245	lncRNA	- && P50429.3 RecName: Full=Arylsulfatase B; Short=ASB; AltName: Full=N-acetylgalactosamine-4-sulfatase; Short=G4S; Flags: Precursor && PF00884:Sulfatase	Sulfatase
ENSMUSG00000025491	122.534	185.77	147.828	47.0139	38.4201	73.0264	152.044	52.8201	1.52714	2.62e-08	2.33e-05	Ifitm1	7	140547134	140549738	+	1094	protein_coding	- && Q9D103.1 RecName: Full=Interferon-induced transmembrane protein 1; AltName: Full=Dispanin subfamily A member 2a; Short=DSPA2a; AltName: Full=Fragilis protein 2; AltName: Full=Mouse ifitm-like protein 2; Short=Mil-2 && PF04505:Interferon-induced transmembrane protein	-
ENSMUSG00000097604	32.6757	27.8655	34.4257	11.7535	9.09949	12.1711	31.6556	11.008	1.52262	0.00212539	0.168686	Gm17322	9	57905324	57914734	+	2169	lncRNA	- && Q5R454.1 RecName: Full=ADP-ribosylation factor-like protein 6-interacting protein 1; Short=ARL-6-interacting protein 1; Short=Aip-1; AltName: Full=Protein TBX2 && -	-
ENSMUSG00000024679	13.2745	61.9234	55.6886	16.2741	15.1658	14.1996	43.6288	15.2131	1.5187	0.00364882	0.231787	Ms4a6d	19	11563968	11582213	-	1735	protein_coding	- && - && PF04103:CD20-like family	-
ENSMUSG00000075602	684.148	1574.92	1081.37	426.742	369.035	385.417	1113.48	393.731	1.49963	9.07e-06	0.00330086	Ly6a	15	74866726	74869880	-	1205	protein_coding	- && - && PF00021:u-PAR/Ly-6 domain	-
ENSMUSG00000109636	21.4435	26.8335	31.3881	6.3288	14.1548	8.11404	26.555	9.53253	1.48538	0.00752242	0.310165	Gm45644	8	58149757	58152496	+	2740	TEC	- && - && -	-
ENSMUSG00000031170	195.033	306.521	159.978	86.795	93.017	56.7983	220.511	78.8701	1.4816	1.03e-08	9.74e-06	Slc38a5	X	8137372	8146418	+	2241	protein_coding	- && - && PF01490:Transmembrane amino acid transporter protein	Aa_trans
ENSMUSG00000038811	10.2112	20.6411	21.2629	3.61646	9.09949	6.08553	17.3717	6.26716	1.47987	0.032341	1	Gngt2	11	95728042	95736560	+	1877	protein_coding	- && - && -	-
ENSMUSG00000030592	51.0559	12.3847	10.1252	5.42468	10.1105	11.1568	24.5219	8.89735	1.46896	0.0315843	0.49172	Ryr1	7	28702769	28824604	-	21838	protein_coding	- && E9PZQ0.1 RecName: Full=Ryanodine receptor 1; Short=RYR-1; Short=RyR1; AltName: Full=Skeletal muscle calcium release channel; AltName: Full=Skeletal muscle ryanodine receptor; AltName: Full=Skeletal muscle-type ryanodine receptor; AltName: Full=Type 1 ryanodine receptor && PF02026:RyR domain|PF08454:RyR and IP3R Homology associated|PF13833:EF-hand domain pair|PF08709:Inositol 1,4,5-trisphosph…	SPRY
novel.94	66.3726	175.45	148.84	57.8633	54.5969	30.4277	130.221	47.6293	1.44818	2.05e-05	0.0061887	-	17	35215753	35219681	-	3232	-	- && P03391.1 RecName: Full=Envelope glycoprotein; AltName: Full=Env polyprotein; Contains: RecName: Full=Surface protein; Short=SU; AltName: Full=Glycoprotein 70; Short=gp70; Contains: RecName: Full=Transmembrane protein; Short=TM; AltName: Full=Envelope protein p15E; Contains: RecName: Full=R-peptide; AltName: Full=p2E; Flags: Precursor && -	-
ENSMUSG00000002769	20.4223	11.3526	18.2253	5.42468	7.07738	6.08553	16.6668	6.19587	1.43081	0.0343622	1	Gnmt	17	47036590	47040094	-	1206	protein_coding	- && - && PF13847:Methyltransferase domain	-
ENSMUSG00000025044	14.2956	77.4042	13.1628	12.6576	19.21	7.09979	34.9542	12.9891	1.42739	0.0273579	0.474481	Msr1	8	40034726	40095714	-	6344	protein_coding	- && P30204.3 RecName: Full=Macrophage scavenger receptor types I and II; AltName: Full=Macrophage acetylated LDL receptor I and II; AltName: Full=Scavenger receptor type A; Short=SR-A; AltName: CD_antigen=CD204 && PF03523:Macrophage scavenger receptor|PF01391:Collagen triple helix repeat (20 copies)|PF00530:Scavenger receptor cysteine-rich domain	SRCR
ENSMUSG00000033538	26.549	114.558	26.3255	24.4111	22.2432	16.2281	55.8109	20.9608	1.41005	0.00654496	0.297148	Casp4	9	5308828	5336783	+	3710	protein_coding	- && P70343.2 RecName: Full=Caspase-4; Short=CASP-4; AltName: Full=Caspase-11; Short=CASP-11; AltName: Full=Protease ICH-3; Contains: RecName: Full=Caspase-4 subunit p10; Contains: RecName: Full=Caspase-4 subunit p20; Flags: Precursor && PF00619:Caspase recruitment domain|PF00656:Caspase domain	Peptidase_C14
ENSMUSG00000079419	12.2534	20.6411	17.2128	8.13703	3.03316	8.11404	16.7025	6.42808	1.37194	0.045532	1	Ms4a6c	19	11446730	11459556	+	2050	protein_coding	- && - && PF04103:CD20-like family	-
ENSMUSG00000109724	53.0981	50.5707	66.8263	43.3975	12.1326	10.1426	56.8317	21.8909	1.36286	0.00358748	0.230888	Gm18194	7	12529650	12533091	-	3442	transcribed_processed_pseudogene	- && - && -	-
ENSMUSG00000029082	18.3801	44.3784	29.3631	11.7535	9.09949	15.2138	30.7072	12.0223	1.35298	0.0102667	0.359626	Bst1	5	43976227	44001328	+	3317	protein_coding	- && Q64277.1 RecName: Full=ADP-ribosyl cyclase/cyclic ADP-ribose hydrolase 2; AltName: Full=ADP-ribosyl cyclase 2; AltName: Full=Antigen BP3; AltName: Full=BP-3 alloantigen; AltName: Full=Bone marrow stromal antigen 1; Short=BST-1; AltName: Full=Cyclic ADP-ribose hydrolase 2; Short=cADPr hydrolase 2; AltName: Full=Leukocyte antigen 65; Short=Ly-65; AltName: CD_antigen=CD157; Flags: Precursor && …	-
ENSMUSG00000090164	20.4223	19.6091	24.3005	9.04114	8.08843	8.11404	21.444	8.41454	1.34815	0.0202883	0.448032	BC035044	6	128826053	128868089	-	1584	protein_coding	- && - && -	-
ENSMUSG00000048489	62.2881	116.622	139.728	30.7399	34.3758	61.8696	106.213	42.3284	1.33117	0.000115031	0.0236078	Depp1	6	116627570	116629755	+	1358	protein_coding	- && Q8K2F3.1 RecName: Full=Protein DEPP; AltName: Full=Fat-specific-expressed gene protein && PF15343:Decidual protein induced by progesterone family	-
ENSMUSG00002076161	30.6335	41.2822	51.6385	7.23291	14.1548	28.3992	41.1847	16.5956	1.32116	0.00716111	0.304105	7SK	9	78082585	78082915	-	331	misc_RNA	- && - && -	-
ENSMUSG00000071713	27.5702	66.0516	45.5634	20.7946	18.199	20.2851	46.395	19.7596	1.23009	0.00434063	0.2464	Csf2rb	15	78209952	78238047	+	7277	protein_coding	- && P26955.2 RecName: Full=Cytokine receptor common subunit beta; AltName: Full=GM-CSF/IL-3/IL-5 receptor common beta subunit; AltName: CD_antigen=CD131; Flags: Precursor && PF09294:Interferon-alpha/beta receptor, fibronectin type III|PF09240:Interleukin-6 receptor alpha chain, binding	-
ENSMUSG00000024727	42.8869	46.4425	43.5383	16.2741	19.21	22.3136	44.2893	19.2659	1.20418	0.00269024	0.193988	Trpm6	19	18727347	18869875	+	7719	protein_coding	- && Q8CIR4.1 RecName: Full=Transient receptor potential cation channel subfamily M member 6; AltName: Full=Channel kinase 2; AltName: Full=Melastatin-related TRP cation channel 6 && PF02816:Alpha-kinase family|PF00520:Ion transport protein|PF16519:Tetramerisation domain of TRPM	Ion_trans
ENSMUSG00000101429	13.2745	31.9937	58.7261	9.04114	16.1769	20.2851	34.6648	15.1677	1.19892	0.0303021	0.485075	BC055402	1	57239804	57254152	-	3301	lncRNA	- && - && -	-
ENSMUSG00000049124	88.8372	91.853	41.5133	15.3699	62.6854	19.2709	74.0678	32.442	1.19596	0.00840687	0.326472	Gm8186	17	26317965	26318195	-	231	processed_pseudogene	- && P62308.1 RecName: Full=Small nuclear ribonucleoprotein G; Short=snRNP-G; AltName: Full=Sm protein G; Short=Sm-G; Short=SmG >P62309.1 RecName: Full=Small nuclear ribonucleoprotein G; Short=snRNP-G; AltName: Full=Sm protein G; Short=Sm-G; Short=SmG >Q3ZBL0.1 RecName: Full=Small nuclear ribonucleoprotein G; Short=snRNP-G; AltName: Full=Sm protein G; Short=Sm-G; Short=SmG && -	-
ENSMUSG00000026656	93.9428	177.514	112.39	62.3839	44.4864	62.8838	127.949	56.5847	1.17529	4.15e-05	0.01072	Fcgr2b	1	170786186	170804116	-	5790	protein_coding	- && - && -	-
ENSMUSG00000038007	587.142	867.959	694.588	355.317	296.239	301.234	716.563	317.597	1.17265	7.34e-15	1.17e-11	Acer2	4	86792633	86853059	+	7159	protein_coding	- && Q8VD53.1 RecName: Full=Alkaline ceramidase 2; Short=AlkCDase 2; Short=Alkaline CDase 2; Short=maCER2; AltName: Full=Acylsphingosine deacylase 3-like; AltName: Full=Cancer-related gene liver 1 protein; Short=CRG-L1; AltName: Full=N-acylsphingosine amidohydrolase 3-like && -	-
ENSMUSG00000030247	139.893	174.417	160.991	70.5209	64.7075	80.1262	158.434	71.7848	1.14242	3.39e-07	0.000194016	Kcnj8	6	142510563	142517340	-	2548	protein_coding	- && P97794.1 RecName: Full=ATP-sensitive inward rectifier potassium channel 8; AltName: Full=Inward rectifier K(+) channel Kir6.1; AltName: Full=Potassium channel, inwardly rectifying subfamily J member 8; AltName: Full=uKATP-1 && -	-
ENSMUSG00000001930	2156.6	3218.98	2034.15	1240.44	1030.26	1142.05	2469.91	1137.59	1.11835	1.41e-06	0.000645864	Vwf	6	125523737	125663642	+	16064	protein_coding	- && - && PF00092:von Willebrand factor type A domain|PF00094:von Willebrand factor type D domain|PF16164:VWA N-terminal|PF00093:von Willebrand factor type C domain|PF01826:Trypsin Inhibitor like cysteine rich domain|PF08742:C8 domain	VWD
ENSMUSG00000042485	19.4012	42.3143	48.6009	25.3152	15.1658	10.1426	36.7721	16.8745	1.11581	0.0254352	0.470368	Mustn1	14	30601157	30603567	+	1236	protein_coding	- && Q99JI1.1 RecName: Full=Musculoskeletal embryonic nuclear protein 1 && -	-
ENSMUSG00000044258	176.653	374.636	234.904	130.192	150.647	95.34	262.065	125.393	1.06282	1.85e-05	0.00569875	Ctla2a	13	61081969	61084439	-	2108	protein_coding	- && P12399.2 RecName: Full=Protein CTLA-2-alpha; AltName: Full=Cytotoxic T-lymphocyte-associated protein 2-alpha; Flags: Precursor && PF08246:Cathepsin propeptide inhibitor domain (I29)	-
ENSMUSG00000003541	222.604	427.271	303.756	160.932	126.382	169.381	317.877	152.232	1.06149	9.45e-07	0.000458596	Ier3	17	36132576	36133815	+	1131	protein_coding	- && P46694.1 RecName: Full=Radiation-inducible immediate-early gene IEX-1; AltName: Full=Immediate early protein GLY96; AltName: Full=Immediate early response 3 protein && -	-
ENSMUSG00000050914	72.4993	111.462	92.1393	44.3016	44.4864	43.613	92.0335	44.1337	1.05999	0.000243314	0.0418814	Ankrd37	8	46449939	46458744	-	1539	protein_coding	- && Q569N2.1 RecName: Full=Ankyrin repeat domain-containing protein 37 && -	-
ENSMUSG00000022146	273.659	491.259	349.319	182.631	189.067	167.352	371.412	179.683	1.04718	8.1e-08	6.18e-05	Osmr	15	6843058	6904450	-	12113	protein_coding	- && O70458.1 RecName: Full=Oncostatin-M-specific receptor subunit beta; AltName: Full=Interleukin-31 receptor subunit beta; Short=IL-31 receptor subunit beta; Short=IL-31R subunit beta; Short=IL-31R-beta; Short=IL-31RB; Flags: Precursor && PF00041:Fibronectin type III domain	fn3
ENSMUSG00000027861	38.8024	52.6349	50.626	27.1234	27.2985	14.1996	47.3544	22.8738	1.04622	0.00915465	0.337668	Casq2	3	101993731	102053830	+	2736	protein_coding	- && O09161.3 RecName: Full=Calsequestrin-2; AltName: Full=Calsequestrin, cardiac muscle isoform; Flags: Precursor && -	-
ENSMUSG00000048572	230.772	406.63	411.083	177.206	164.802	170.395	349.495	170.801	1.03257	3.22e-07	0.000190966	Tmem252	19	24651372	24659597	+	5034	protein_coding	- && Q8C353.1 RecName: Full=Transmembrane protein 252 && PF15664:Transmembrane protein 252 family	-
ENSMUSG00000018339	436.017	1366.44	960.881	410.468	370.046	571.026	921.113	450.513	1.03186	0.0362486	0.510979	Gpx3	11	54793279	54801203	+	1813	protein_coding	- && P46412.2 RecName: Full=Glutathione peroxidase 3; Short=GPx-3; Short=GSHPx-3; AltName: Full=Plasma glutathione peroxidase; Short=GPx-P; Short=GSHPx-P; Flags: Precursor && -	-
ENSMUSG00000022952	46.9714	42.3143	37.4632	23.507	20.2211	18.2566	42.2496	20.6615	1.0291	0.0103606	0.359767	Runx1	16	92398354	92623037	-	12025	protein_coding	- && - && -	-
ENSMUSG00000060591	157.252	256.982	173.141	105.781	78.8622	103.454	195.792	96.0325	1.02612	9.53e-06	0.00331503	Ifitm2	7	140534750	140535900	-	655	protein_coding	- && Q99J93.1 RecName: Full=Interferon-induced transmembrane protein 2; AltName: Full=Dispanin subfamily A member 2c; Short=DSPA2c; AltName: Full=Fragilis protein 3 && PF04505:Interferon-induced transmembrane protein	-
ENSMUSG00000022676	12.2534	13.4167	18.2253	27.1234	24.2653	36.5132	14.6318	29.3006	-1.00035	0.0398885	0.522497	Snai2	16	14523716	14527249	+	2021	protein_coding	- && P97469.1 RecName: Full=Zinc finger protein SNAI2; AltName: Full=Neural crest transcription factor Slug; AltName: Full=Protein snail homolog 2 && PF00096:Zinc finger, C2H2 type	zf-C2H2
ENSMUSG00000021223	18.3801	10.3206	29.3631	41.5892	37.409	38.5417	19.3546	39.18	-1.01658	0.0234357	0.462644	Papln	12	83810408	83839156	+	5635	protein_coding	- && - && PF16626:Linking region between Kunitz_BPTI and I-set on papilin|PF07679:Immunoglobulin I-set domain|PF05986:ADAM-TS Spacer 1|PF08686:PLAC (protease and lacunin) domain|PF00014:Kunitz/Bovine pancreatic trypsin inhibitor domain|PF00090:Thrombospondin type 1 domain|PF00047:Immunoglobulin domain	Kunitz_BPTI
ENSMUSG00000030669	267.533	187.834	217.692	499.975	553.047	330.647	224.353	461.223	-1.04	3.7e-08	3.11e-05	Calca	7	114230713	114235592	-	1684	protein_coding	- && Q99JA0.1 RecName: Full=Calcitonin gene-related peptide 1; AltName: Full=Alpha-type CGRP; AltName: Full=Calcitonin gene-related peptide I; Short=CGRP-I; Flags: Precursor && PF00214:Calcitonin / CGRP / IAPP family	-
ENSMUSG00000108049	9.19005	17.545	15.1878	23.507	32.3537	31.4419	13.9743	29.1009	-1.05644	0.0333558	0.500711	Gm44168	6	87963173	87966711	+	3539	TEC	- && - && -	-
ENSMUSG00000044034	14.2956	13.4167	18.2253	19.8905	33.3648	42.5987	15.3126	31.9513	-1.05656	0.0304328	0.486196	Npb	11	120499303	120499919	+	542	protein_coding	- && Q8K4P1.1 RecName: Full=Neuropeptide B; AltName: Full=Preproprotein L7; Short=mPPL7; Contains: RecName: Full=Neuropeptide B-29; Short=NPB29; AltName: Full=L7C; Flags: Precursor && PF15180:Neuropeptides B and W	-
ENSMUSG00000030834	34.718	11.3526	10.1252	27.1234	40.4422	50.7128	18.7319	39.4261	-1.0711	0.0333293	0.500711	Abcc6	7	45616979	45679726	-	5721	protein_coding	- && Q9R1S7.3 RecName: Full=Multidrug resistance-associated protein 6; AltName: Full=ATP-binding cassette sub-family C member 6 && PF00664:ABC transporter transmembrane region|PF00005:ABC transporter	ABC_membrane
ENSMUSG00000051149	36.7602	20.6411	32.4006	63.288	46.5085	79.1119	29.934	62.9695	-1.07221	0.00314706	0.212566	Adnp	2	168022906	168049032	-	5350	protein_coding	- && Q9Z103.2 RecName: Full=Activity-dependent neuroprotector homeobox protein; AltName: Full=Activity-dependent neuroprotective protein && PF00046:Homeobox domain	Homeobox
ENSMUSG00000023046	162.358	135.199	120.49	279.371	175.923	423.959	139.349	293.084	-1.07243	1.54e-05	0.00502428	Igfbp6	15	102052797	102057946	+	1112	protein_coding	- && P47880.2 RecName: Full=Insulin-like growth factor-binding protein 6; Short=IBP-6; Short=IGF-binding protein 6; Short=IGFBP-6; Flags: Precursor && PF00086:Thyroglobulin type-1 repeat|PF00219:Insulin-like growth factor binding protein	-
ENSMUSG00000087675	9.19005	12.3847	20.2504	35.2604	29.3206	23.3279	13.9417	29.303	-1.07302	0.0338015	0.504543	Gm11762	11	119439456	119459872	+	1705	lncRNA	- && - && -	-
ENSMUSG00000095332	17.359	16.5129	17.2128	41.5892	31.3427	34.4847	17.0282	35.8055	-1.07411	0.0141223	0.411783	Gm9821	2	91776048	91779033	+	2034	lncRNA	- && Q13574.3 RecName: Full=Diacylglycerol kinase zeta; Short=DAG kinase zeta; AltName: Full=Diglyceride kinase zeta; Short=DGK-zeta && -	-
ENSMUSG00000075268	30.6335	20.6411	50.626	54.2468	66.7296	94.3258	33.9669	71.7674	-1.07605	0.00360582	0.230888	Gm10819	19	16244425	16244985	-	561	processed_pseudogene	- && P70296.3 RecName: Full=Phosphatidylethanolamine-binding protein 1; Short=PEBP-1; AltName: Full=HCNPpp; Contains: RecName: Full=Hippocampal cholinergic neurostimulating peptide; Short=HCNP && PF01161:Phosphatidylethanolamine-binding protein	-
ENSMUSG00000110279	17.359	8.25645	18.2253	27.1234	40.4422	25.3564	14.6136	30.974	-1.08136	0.030207	0.48499	Gm45552	7	44771341	44773568	+	778	lncRNA	- && - && -	-
ENSMUSG00000050397	20.4223	15.4808	14.1753	35.2604	32.3537	38.5417	16.6928	35.3853	-1.08394	0.0144072	0.414388	Foxl2	9	98837341	98840596	+	3256	protein_coding	- && - && -	-
ENSMUSG00000075589	19.4012	13.4167	14.1753	35.2604	23.2542	41.5845	15.6644	33.3664	-1.09132	0.020674	0.448273	Gm11536	11	96227125	96232934	-	535	lncRNA	- && - && -	-
ENSMUSG00000071497	13.2745	15.4808	22.2754	34.3563	38.4201	36.5132	17.0103	36.4299	-1.09741	0.0129957	0.402389	Nutf2-ps1	19	53576599	53577499	-	901	protein_coding	- && - && PF02136:Nuclear transport factor 2 (NTF2) domain	-
ENSMUSG00000098449	17.359	11.3526	10.1252	22.6029	22.2432	38.5417	12.9456	27.7959	-1.10038	0.0348496	0.507576	Gm7467	5	76452723	76453374	+	652	lncRNA	- && - && -	-
ENSMUSG00000110358	14.2956	23.7373	14.1753	44.3016	36.3979	31.4419	17.4027	37.3805	-1.10601	0.0130331	0.402747	A730009L09Rik	16	84312009	84320776	+	2512	protein_coding	- && - && -	-
ENSMUSG00000023886	146.02	112.494	70.8763	268.522	123.349	317.462	109.797	236.444	-1.10691	0.0235477	0.462644	Smoc2	17	14499768	14625052	+	6951	protein_coding	- && Q8CD91.1 RecName: Full=SPARC-related modular calcium-binding protein 2; AltName: Full=Secreted modular calcium-binding protein 2; Short=SMOC-2; Flags: Precursor && PF07648:Kazal-type serine protease inhibitor domain|PF10591:Secreted protein acidic and rich in cysteine Ca binding region|PF16597:Thyroglobulin_1 repeat associated disordered domain|PF00086:Thyroglobulin type-1 repeat	-
ENSMUSG00000105340	19.4012	11.3526	19.2379	42.4934	33.3648	33.4704	16.6639	36.4429	-1.12993	0.0117505	0.379867	Gm42878	5	121656676	121683545	-	4783	protein_coding	- && O54992.1 RecName: Full=MAP kinase-activated protein kinase 5; Short=MAPK-activated protein kinase 5; Short=MAPKAP kinase 5; Short=MAPKAPK-5 && -	-
ENSMUSG00000043833	15.3168	14.4488	15.1878	38.8769	32.3537	27.3849	14.9844	32.8718	-1.13549	0.0140136	0.411783	2900005J15Rik	5	25305981	25315107	+	2928	lncRNA	- && - && -	-
ENSMUSG00000078302	12.2534	18.577	18.2253	45.2057	18.199	44.6272	16.3519	36.0106	-1.14135	0.0193399	0.446747	Foxd1	13	98490750	98495813	+	5064	protein_coding	- && Q61345.2 RecName: Full=Forkhead box protein D1; AltName: Full=Brain factor 2; Short=BF-2; AltName: Full=Forkhead-related protein FKHL8; AltName: Full=Forkhead-related transcription factor 4; Short=FREAC-4; AltName: Full=HFH-BF-2 && -	-
ENSMUSG00000042436	21.4435	11.3526	24.3005	42.4934	32.3537	54.7698	19.0322	43.2056	-1.18142	0.00691547	0.303961	Mfap4	11	61376257	61379726	+	1922	protein_coding	- && - && PF00147:Fibrinogen beta and gamma chains, C-terminal globular domain	Fibrinogen_C
ENSMUSG00000046714	25.5279	8.25645	18.2253	38.8769	20.2211	60.8553	17.3366	39.9844	-1.20446	0.0184207	0.44276	Foxc2	8	121842910	121845634	+	2725	protein_coding	- && - && PF00250:Forkhead domain	Fork_head
ENSMUSG00000090873	6.1267	11.3526	7.08763	18.0823	18.199	21.2994	8.18898	19.1935	-1.22918	0.0449905	0.534675	Gm17112	5	137530685	137538980	+	432	lncRNA	- && - && -	-
ENSMUSG00000021319	37.7813	35.0899	23.2879	131.097	37.409	56.7983	32.0531	75.1013	-1.23312	0.00334164	0.221045	Sfrp4	13	19807274	19817164	+	4179	protein_coding	- && Q9Z1N6.1 RecName: Full=Secreted frizzled-related sequence protein 4; Short=FRP-4; Short=sFRP-4; Flags: Precursor && PF01759:UNC-6/NTR/C345C module|PF01392:Fz domain	Fz
ENSMUSG00000028845	5.10559	10.3206	10.1252	14.4658	25.2764	21.2994	8.51711	20.3472	-1.25335	0.0406729	0.525647	Tekt2	4	126215914	126219481	-	1900	protein_coding	- && Q922G7.1 RecName: Full=Tektin-2; AltName: Full=Tektin-t; AltName: Full=Testicular tektin && PF03148:Tektin family	-
ENSMUSG00000060586	52.077	34.0578	50.626	151.891	58.6411	118.668	45.5869	109.733	-1.26926	0.000163263	0.0307473	H2-Eb1	17	34524841	34535648	+	1944	protein_coding	- && P04230.1 RecName: Full=H-2 class II histocompatibility antigen, E-B beta chain; Flags: Precursor && -	-
ENSMUSG00000036594	76.5838	31.9937	62.7762	188.96	74.818	150.11	57.1179	137.963	-1.2735	0.000166904	0.0310674	H2-Aa	17	34501718	34506797	-	3798	protein_coding	- && P14434.2 RecName: Full=H-2 class II histocompatibility antigen, A-B alpha chain; Short=IAalpha; Flags: Precursor && PF00993:Class II histocompatibility antigen, alpha domain|PF16196:C1-set C-terminal domain|PF07654:Immunoglobulin C1-set domain	C1-set
ENSMUSG00000024610	140.914	54.699	168.078	342.659	175.923	373.246	121.23	297.276	-1.294	0.0195183	0.447635	Cd74	18	60936920	60945724	+	1679	protein_coding	- && P04441.3 RecName: Full=H-2 class II histocompatibility antigen gamma chain; AltName: Full=Ia antigen-associated invariant chain; Short=Ii; AltName: Full=MHC class II-associated invariant chain; AltName: CD_antigen=CD74 && PF08831:Class II MHC-associated invariant chain trimerisation domain|PF09307:CLIP, MHC2 interacting	-
ENSMUSG00000033227	23.4857	13.4167	18.2253	54.2468	13.1437	69.9836	18.3759	45.7914	-1.31797	0.0115534	0.377746	Wnt6	1	74811051	74824481	+	2192	protein_coding	- && P22727.2 RecName: Full=Protein Wnt-6; Flags: Precursor && PF00110:wnt family	wnt
ENSMUSG00000028963	68.4148	26.8335	51.6385	139.234	130.426	108.525	48.9623	126.062	-1.36441	4.96e-06	0.00198582	Uts2	4	151081554	151086267	+	538	protein_coding	- && - && PF02083:Urotensin II	-
ENSMUSG00000104435	12.2534	4.12822	5.0626	20.7946	13.1437	21.2994	7.14808	18.4126	-1.36595	0.0409015	0.525647	Gm37422	1	189612132	189616849	+	4718	lncRNA	- && Q8R5A0.1 RecName: Full=N-lysine methyltransferase SMYD2; AltName: Full=Histone methyltransferase SMYD2; AltName: Full=SET and MYND domain-containing protein 2 && -	-
ENSMUSG00000030361	10.2112	5.16028	3.03756	21.6987	12.1326	16.2281	6.13634	16.6865	-1.44678	0.04047	1	Klrb1a	6	128586190	128600496	-	1595	protein_coding	- && P27811.2 RecName: Full=Killer cell lectin-like receptor subfamily B member 1A; Short=NKR-P1A; AltName: Full=CD161 antigen-like family member A; AltName: Full=Lymphocyte antigen 55A; Short=Ly-55A; AltName: Full=NKR-P1.7; AltName: Full=Natural killer cell surface protein P1-2; Short=NKR-P1 2; AltName: CD_antigen=CD161a && PF00059:Lectin C-type domain	Lectin_C
ENSMUSG00000049103	10.2112	8.25645	7.08763	33.4522	11.1216	26.3706	8.51842	23.6482	-1.47715	0.0159016	0.426608	Ccr2	9	123901987	123913594	+	6760	protein_coding	- && P51683.2 RecName: Full=C-C chemokine receptor type 2; Short=C-C CKR-2; Short=CC-CKR-2; Short=CCR-2; Short=CCR2; AltName: Full=JE/FIC receptor; AltName: Full=MCP-1 receptor; AltName: CD_antigen=CD192 && PF00001:7 transmembrane receptor (rhodopsin family)	7tm_1
ENSMUSG00000087038	4.08447	9.2885	6.07512	18.9864	18.199	19.2709	6.4827	18.8187	-1.53869	0.0179547	0.439478	2900079G21Rik	9	112063345	112177993	+	6718	lncRNA	- && - && -	-
ENSMUSG00000037579	3.06335	6.19234	5.0626	14.4658	10.1105	17.2423	4.77276	13.9396	-1.54719	0.0407317	1	Kcnh3	15	99122742	99140698	+	5756	protein_coding	- && Q9WVJ0.2 RecName: Full=Potassium voltage-gated channel subfamily H member 3; AltName: Full=Ether-a-go-go-like potassium channel 2; Short=ELK channel 2; Short=mElk2; AltName: Full=Voltage-gated potassium channel subunit Kv12.2 && PF00027:Cyclic nucleotide-binding domain|PF13426:PAS domain|PF00520:Ion transport protein	Ion_trans
ENSMUSG00000031849	7.14782	5.16028	8.10015	42.4934	3.03316	16.2281	6.80275	20.5849	-1.60371	0.0392975	0.519485	Comp	8	70826208	70834716	+	2967	protein_coding	- && - && PF02412:Thrombospondin type 3 repeat|PF11598:Cartilage oligomeric matrix protein|PF05735:Thrombospondin C-terminal region|PF07645:Calcium-binding EGF domain	TSP_C
ENSMUSG00000113918	5.10559	5.16028	4.05008	12.6576	12.1326	19.2709	4.77198	14.687	-1.62073	0.0283655	1	Gm6566	12	87196249	87202260	-	1171	lncRNA	- && P31789.1 RecName: Full=Envelope glycoprotein; AltName: Full=Env polyprotein; Contains: RecName: Full=Surface protein; Short=SU; Contains: RecName: Full=Transmembrane protein; Short=TM; Flags: Precursor [Mouse Intracisternal A-particle] && -	-
ENSMUSG00000021055	5.10559	3.09617	5.0626	9.94525	15.1658	16.2281	4.42145	13.7797	-1.63587	0.0330076	1	Esr2	12	76167193	76224033	-	3368	protein_coding	- && - && PF12497:Estrogen receptor beta|PF00104:Ligand-binding domain of nuclear hormone receptor|PF00105:Zinc finger, C4 type (two domains)	Hormone_recep
ENSMUSG00000097760	3.06335	5.16028	3.03756	15.3699	14.1548	7.09979	3.75373	12.2082	-1.70553	0.0405457	1	6030442K20Rik	1	132394171	132404802	-	2222	lncRNA	- && - && -	-
ENSMUSG00000112596	2.04223	4.12822	4.05008	21.6987	5.05527	8.11404	3.40685	11.6227	-1.77855	0.0498875	1	Gm48804	10	121664923	121667963	-	3041	TEC	- && Q7Z6B7.1 RecName: Full=SLIT-ROBO Rho GTPase-activating protein 1; Short=srGAP1; AltName: Full=Rho GTPase-activating protein 13 && -	-
ENSMUSG00000112449	47.9925	307.553	102.264	442.112	341.736	870.231	152.603	551.36	-1.85326	0.0243495	0.465509	Srp54b	12	55201889	55236358	+	4513	protein_coding	- && P14576.2 RecName: Full=Signal recognition particle 54 kDa protein; Short=SRP54 && -	-
ENSMUSG00000027656	5.10559	5.16028	5.0626	28.9317	4.04422	22.3136	5.10949	18.4298	-1.85522	0.0165514	1	Ccn5	2	163662781	163675066	+	1924	protein_coding	- && Q9Z0G4.1 RecName: Full=WNT1-inducible-signaling pathway protein 2; Short=WISP-2; AltName: Full=CCN family member 5; AltName: Full=Connective tissue growth factor-like protein; Short=CTGF-L; Flags: Precursor && -	-
ENSMUSG00000000031	29.6124	18.577	18.2253	162.741	26.2874	62.8838	22.1383	83.9706	-1.927	8.99e-05	0.0189368	H19	7	142129266	142131880	-	2460	lncRNA	- && - && -	-
ENSMUSG00000022595	3.06335	3.09617	3.03756	10.8494	8.08843	16.2281	3.06569	11.722	-1.93407	0.0260932	1	Lypd2	15	74604096	74606178	-	679	protein_coding	- && - && PF00021:u-PAR/Ly-6 domain	-
ENSMUSG00000092512	1.02112	2.06411	4.05008	6.3288	7.07738	15.2138	2.37844	9.54	-1.99881	0.045774	1	Gm4152	17	34199457	34199732	-	276	processed_pseudogene	- && P62075.1 RecName: Full=Mitochondrial import inner membrane translocase subunit Tim13 >P62076.1 RecName: Full=Mitochondrial import inner membrane translocase subunit Tim13 && -	-
ENSMUSG00000056054	22.4646	49.5387	47.5884	270.33	62.6854	161.267	39.8639	164.761	-2.0479	0.00212859	0.168686	S100a8	3	90576285	90577342	+	694	protein_coding	- && P27005.3 RecName: Full=Protein S100-A8; AltName: Full=Calgranulin-A; AltName: Full=Chemotactic cytokine CP-10; AltName: Full=Leukocyte L1 complex light chain; AltName: Full=Migration inhibitory factor-related protein 8; Short=MRP-8; Short=p8; AltName: Full=Pro-inflammatory S100 cytokine; AltName: Full=S100 calcium-binding protein A8 && -	-
ENSMUSG00000029372	8.16894	0	3.03756	13.5617	16.1769	17.2423	3.7355	15.6603	-2.06467	0.0139383	1	Ppbp	5	90916377	90917922	+	1083	protein_coding	- && P43030.1 RecName: Full=Platelet basic protein; Short=PBP; AltName: Full=C-X-C motif chemokine 7; AltName: Full=Small-inducible cytokine B7; Flags: Precursor && PF00048:Small cytokines (intecrine/chemokine), interleukin-8 like	-
ENSMUSG00000040592	0	1.03206	6.07512	10.8494	7.07738	12.1711	2.36906	10.0326	-2.07876	0.046282	1	Cd79b	11	106202167	106205588	-	1431	protein_coding	- && P15530.1 RecName: Full=B-cell antigen receptor complex-associated protein beta chain; AltName: Full=B-cell-specific glycoprotein B29; AltName: Full=Ig-beta; AltName: Full=Immunoglobulin-associated B29 protein; AltName: CD_antigen=CD79b; Flags: Precursor && PF07679:Immunoglobulin I-set domain	I-set
novel.41	1.02112	5.16028	1.01252	9.04114	15.1658	7.09979	2.39797	10.4356	-2.12452	0.0319893	1	-	12	111503674	111504285	+	612	-	- && - && -	-
ENSMUSG00000024650	3.06335	1.03206	6.07512	9.04114	6.06632	32.4562	3.39017	15.8545	-2.21926	0.0132363	1	Slc22a6	19	8595403	8605663	+	3983	protein_coding	- && - && PF00083:Sugar (and other) transporter	Sugar_tr
ENSMUSG00000028989	1.02112	3.09617	4.05008	16.2741	6.06632	18.2566	2.72245	13.5323	-2.31448	0.00998699	1	Angptl7	4	148579640	148584917	-	2157	protein_coding	- && Q8R1Q3.1 RecName: Full=Angiopoietin-related protein 7; AltName: Full=Angiopoietin-like protein 7; Flags: Precursor && PF00147:Fibrinogen beta and gamma chains, C-terminal globular domain	Fibrinogen_C
ENSMUSG00000028571	4.08447	3.09617	2.02504	21.6987	13.1437	18.2566	3.06856	17.6997	-2.53108	0.00123448	1	Cyp2j13	4	95915771	95965783	-	4690	protein_coding	- && P51590.1 RecName: Full=Cytochrome P450 2J3; AltName: Full=CYPIIJ3 && PF00067:Cytochrome P450	p450
ENSMUSG00000103543	2.04223	0	2.02504	5.42468	9.09949	9.1283	1.35576	7.88416	-2.53282	0.0324136	1	Gm37669	1	153319227	153320046	+	820	TEC	- && - && -	-
ENSMUSG00000118426	1.02112	2.06411	1.01252	11.7535	6.06632	7.09979	1.36592	8.30653	-2.61065	0.022965	1	Gm2102	1	78193369	78194113	-	745	processed_pseudogene	- && - && PF14634:zinc-RING finger domain	-
ENSMUSG00000034028	0	1.03206	3.03756	6.3288	10.1105	9.1283	1.35654	8.52255	-2.64539	0.0238319	1	Cd226	18	89195091	89290353	+	4891	protein_coding	- && - && PF07686:Immunoglobulin V-set domain	V-set
ENSMUSG00000075405	1.02112	1.03206	2.02504	5.42468	18.199	2.02851	1.3594	8.55072	-2.64858	0.0300659	1	9430097D07Rik	2	32464196	32465696	-	1501	lncRNA	- && - && -	-
ENSMUSG00000106691	1.02112	0	2.02504	7.23291	5.05527	7.09979	1.01539	6.46266	-2.66578	0.0441399	1	2700029L08Rik	5	134548179	134549643	-	1465	TEC	- && - && -	-
ENSMUSG00000056071	15.3168	24.7693	25.313	253.152	57.6301	114.611	21.7997	141.798	-2.70244	4.14e-05	0.01072	S100a9	3	90599939	90603028	-	522	protein_coding	- && P31725.3 RecName: Full=Protein S100-A9; AltName: Full=Calgranulin-B; AltName: Full=Leukocyte L1 complex heavy chain; AltName: Full=Migration inhibitory factor-related protein 14; Short=MRP-14; Short=p14; AltName: Full=S100 calcium-binding protein A9 && PF01023:S-100/ICaBP type calcium binding domain	-
ENSMUSG00000004885	3.06335	2.06411	1.01252	14.4658	5.05527	21.2994	2.04666	13.6068	-2.73455	0.00464039	1	Crabp2	3	87855973	87860683	+	1322	protein_coding	- && P22935.2 RecName: Full=Cellular retinoic acid-binding protein 2; AltName: Full=Cellular retinoic acid-binding protein II; Short=CRABP-II && PF00061:Lipocalin / cytosolic fatty-acid binding protein family	-
ENSMUSG00000097487	0	1.03206	2.02504	4.52057	2.02211	15.2138	1.01903	7.25217	-2.82577	0.0384856	1	Ptges3l	11	101309638	101316159	-	2108	protein_coding	- && Q9D9A7.1 RecName: Full=Putative protein PTGES3L; AltName: Full=Prostaglandin E synthase 3-like && -	-
ENSMUSG00000040809	2.04223	11.3526	7.08763	96.7402	18.199	30.4277	6.8275	48.4556	-2.83306	1.21e-05	0.00411581	Chil3	3	106054870	106074880	-	1632	protein_coding	- && - && PF00704:Glycosyl hydrolases family 18	-
ENSMUSG00000005800	0	5.16028	1.01252	26.2193	9.09949	9.1283	2.0576	14.8157	-2.85882	0.00402659	1	Mmp8	9	7558457	7568486	+	2425	protein_coding	- && O70138.2 RecName: Full=Neutrophil collagenase; AltName: Full=Collagenase 2; AltName: Full=Matrix metalloproteinase-8; Short=MMP-8; Flags: Precursor && PF00413:Matrixin|PF01471:Putative peptidoglycan binding domain|PF00045:Hemopexin	Hemopexin
ENSMUSG00000061100	3.06335	0	1.01252	9.94525	12.1326	10.1426	1.35862	10.7402	-2.9796	0.00675574	1	Retnla	16	48662914	48664824	+	599	protein_coding	- && Q9EP95.1 RecName: Full=Resistin-like alpha; AltName: Full=Cysteine-rich secreted protein A12-gamma; AltName: Full=Cysteine-rich secreted protein FIZZ1; AltName: Full=Hypoxia-induced mitogenic factor; AltName: Full=Parasite-induced macrophage novel gene 1 protein; AltName: Full=RELMalpha; Flags: Precursor && PF06954:Resistin	-
ENSMUSG00000052212	2.04223	2.06411	1.01252	26.2193	1.01105	13.1853	1.70629	13.4719	-2.98837	0.00663732	1	Cd177	7	24443408	24459736	-	2840	protein_coding	- && Q8R2S8.1 RecName: Full=CD177 antigen; AltName: CD_antigen=CD177; Flags: Precursor && PF00021:u-PAR/Ly-6 domain	-
ENSMUSG00000090024	2.04223	1.03206	0	10.8494	6.06632	10.1426	1.02476	9.01942	-3.1422	0.01047	1	Gm16350	8	15011066	15011586	-	446	lncRNA	- && - && -	-
ENSMUSG00000102830	0	1.03206	1.01252	8.13703	1.01105	9.1283	0.681525	6.09213	-3.16311	0.0402668	1	Gm37012	9	87070389	87071466	-	1078	TEC	- && - && -	-
ENSMUSG00000079402	3.06335	2.06411	3.03756	23.507	49.5416	3.04277	2.72167	25.3638	-3.21908	0.000263877	0.0449377	Gm3020	14	18796558	18817743	-	1933	protein_coding	- && - && -	-
ENSMUSG00000004552	1.02112	0	1.01252	10.8494	5.05527	3.04277	0.677879	6.3158	-3.22157	0.0309246	1	Ctse	1	131566044	131603243	+	3170	protein_coding	- && - && -	-
ENSMUSG00000022651	1.02112	3.09617	1.01252	24.4111	12.1326	11.1568	1.70993	15.9002	-3.22536	0.000716634	1	Retnlg	16	48692984	48694859	+	593	protein_coding	- && Q9EP95.1 RecName: Full=Resistin-like alpha; AltName: Full=Cysteine-rich secreted protein A12-gamma; AltName: Full=Cysteine-rich secreted protein FIZZ1; AltName: Full=Hypoxia-induced mitogenic factor; AltName: Full=Parasite-induced macrophage novel gene 1 protein; AltName: Full=RELMalpha; Flags: Precursor && PF06954:Resistin	-
ENSMUSG00000026581	2.04223	1.03206	0	19.8905	3.03316	7.09979	1.02476	10.0078	-3.2976	0.00912062	1	Sell	1	163889551	163911750	+	5911	protein_coding	- && P18337.1 RecName: Full=L-selectin; AltName: Full=CD62 antigen-like family member L; AltName: Full=Leukocyte adhesion molecule 1; Short=LAM-1; AltName: Full=Leukocyte-endothelial cell adhesion molecule 1; Short=LECAM1; AltName: Full=Lymph node homing receptor; AltName: Full=Lymphocyte antigen 22; Short=Ly-22; AltName: Full=Lymphocyte surface MEL-14 antigen; AltName: CD_antigen=CD62L; Flags: P…	-
ENSMUSG00000094066	3.06335	0	3.03756	18.9864	21.2321	21.2994	2.03364	20.506	-3.32849	8.88e-05	1	Fam205a2	4	42522580	42528175	-	3927	protein_coding	- && - && PF14650:FAM75 family|PF15371:Domain of unknown function (DUF4599)	-
ENSMUSG00000038357	1.02112	1.03206	3.03756	33.4522	12.1326	8.11404	1.69691	17.8996	-3.40194	0.000448318	1	Camp	9	109676447	109678685	-	758	protein_coding	- && P51437.2 RecName: Full=Cathelicidin antimicrobial peptide; AltName: Full=Cathelin-like protein; Short=CLP; Contains: RecName: Full=Cathelin-related antimicrobial peptide; Short=Cramp; Flags: Precursor && PF00666:Cathelicidin|PF12153:LPS binding domain of CAP18 (C terminal)	-
ENSMUSG00000051839	1.02112	2.06411	0	22.6029	4.04422	6.08553	1.02841	10.9109	-3.42084	0.00599954	1	Gypa	8	81220410	81237171	+	1848	protein_coding	- && P14220.2 RecName: Full=Glycophorin-A; AltName: CD_antigen=CD235a && PF01102:Glycophorin A	-
ENSMUSG00000117123	1.02112	0	0	5.42468	2.02211	5.07128	0.340372	4.17269	-3.51321	0.0495845	1	Gm49890	4	88828092	88856758	-	1087	lncRNA	- && - && -	-
ENSMUSG00000032496	4.08447	3.09617	6.07512	103.069	21.2321	33.4704	4.41858	52.5905	-3.57607	5.38e-08	4.3e-05	Ltf	9	110848339	110871835	+	3450	protein_coding	- && - && PF00405:Transferrin	-
ENSMUSG00000105282	0	1.03206	0	9.04114	3.03316	1.01426	0.344019	4.36285	-3.58346	0.0495512	1	Gm42981	5	44649512	44652763	-	3252	TEC	- && - && -	-
ENSMUSG00000022584	2.04223	1.03206	0	21.6987	8.08843	7.09979	1.02476	12.2957	-3.5936	0.00229518	1	Ly6c2	15	74980007	74983819	-	2740	protein_coding	- && P0CW03.1 RecName: Full=Lymphocyte antigen 6C2; Short=Ly-6C2; Flags: Precursor && PF00021:u-PAR/Ly-6 domain	-
ENSMUSG00000054191	0	1.03206	0	4.52057	6.06632	3.04277	0.344019	4.54322	-3.63343	0.0369796	1	Klf1	8	85628557	85631924	+	1534	protein_coding	- && P46099.2 RecName: Full=Krueppel-like factor 1; AltName: Full=Erythroid krueppel-like transcription factor; Short=EKLF && PF16832:Erythroid krueppel-like transcription factor, transactivation 1|PF16833:Erythroid krueppel-like transcription factor, transactivation 2	-
ENSMUSG00000038580	0	0	1.01252	3.61646	6.06632	4.05702	0.337506	4.57993	-3.64317	0.0358607	1	Sct	7	140858243	140859046	-	645	protein_coding	- && Q08535.1 RecName: Full=Secretin; Flags: Precursor && -	-
ENSMUSG00000119873	1.02112	0	0	4.52057	6.06632	4.05702	0.340372	4.88131	-3.73634	0.0286492	1	Gm24497	1	72283372	72283562	+	191	snRNA	- && - && -	-
ENSMUSG00000119577	1.02112	0	0	4.52057	4.04422	6.08553	0.340372	4.88344	-3.73686	0.0286196	1	Gm24727	8	34181829	34181972	+	144	snoRNA	- && - && -	-
ENSMUSG00000032484	2.04223	8.25645	11.1377	176.302	44.4864	70.9979	7.14546	97.2622	-3.76739	7.25e-06	0.00270054	Ngp	9	110248815	110252080	+	1222	protein_coding	- && O08692.1 RecName: Full=Neutrophilic granule protein; Short=NGP; AltName: Full=Cystatin-like protein; AltName: Full=Myeloid bactenecin protein; AltName: Full=Myeloid secondary granule protein; Flags: Precursor && PF00666:Cathelicidin	-
ENSMUSG00000086127	0	0	1.01252	0	8.08843	7.09979	0.337506	5.06274	-3.78295	0.0409278	1	Gm11934	4	33303569	33310137	-	1536	lncRNA	- && - && -	-
ENSMUSG00000049709	0	1.03206	0	6.3288	6.06632	5.07128	0.344019	5.82213	-3.99202	0.0147901	1	Nlrp10	7	108521059	108529385	-	4504	protein_coding	- && Q8CCN1.1 RecName: Full=NACHT, LRR and PYD domains-containing protein 10 && PF02758:PAAD/DAPIN/Pyrin domain|PF05729:NACHT domain	NACHT
ENSMUSG00000025270	6.1267	8.25645	1.01252	104.877	76.8401	78.0977	5.13189	86.605	-4.0831	2.14e-16	3.81e-13	Alas2	X	149330371	149353634	+	2403	protein_coding	- && P08680.3 RecName: Full=5-aminolevulinate synthase, erythroid-specific, mitochondrial; Short=ALAS-E; AltName: Full=5-aminolevulinic acid synthase 2; AltName: Full=Delta-ALA synthase 2; AltName: Full=Delta-aminolevulinate synthase 2; Flags: Precursor && PF00155:Aminotransferase class I and II|PF09029:5-aminolevulinate synthase presequence	Aminotran_1_2
ENSMUSG00000027556	0	0	1.01252	11.7535	6.06632	2.02851	0.337506	6.61611	-4.18173	0.0109245	1	Car1	3	14831276	14873428	-	1248	protein_coding	- && - && PF00194:Eukaryotic-type carbonic anhydrase	-
ENSMUSG00000115378	0	0	0	2.71234	5.05527	3.04277	0	3.60346	-4.25896	0.0282093	1	Gm39653	1	63655127	63659978	+	1105	protein_coding	- && - && -	-
ENSMUSG00000026532	0	0	0	2.71234	4.04422	4.05702	0	3.60453	-4.25931	0.0277777	1	Spta1	1	174000342	174076016	+	9691	protein_coding	- && P08032.3 RecName: Full=Spectrin alpha chain, erythrocytic 1; AltName: Full=Erythroid alpha-spectrin && PF00435:Spectrin repeat|PF00018:SH3 domain|PF08726:Ca2+ insensitive EF hand	SH3_1
ENSMUSG00000095675	0	0	0	9.04114	2.02211	0	0	3.68775	-4.3027	0.0439416	1	Ccl21b	4	42255693	42256825	+	869	protein_coding	- && - && PF00048:Small cytokines (intecrine/chemokine), interleukin-8 like	-
ENSMUSG00000018168	0	0	0	3.61646	5.05527	3.04277	0	3.90483	-4.3762	0.0206043	1	Ikzf3	11	98355728	98436857	-	8754	protein_coding	- && - && PF00096:Zinc finger, C2H2 type	zf-C2H2
ENSMUSG00000108594	0	0	0	2.71234	6.06632	3.04277	0	3.94048	-4.3875	0.0206251	1	Gm44770	6	71779872	71781135	+	1264	TEC	- && - && -	-
ENSMUSG00000106060	0	0	0	8.13703	3.03316	1.01426	0	4.06148	-4.4406	0.0217409	1	Gm42488	5	112087670	112092101	-	3225	lncRNA	- && - && -	-
ENSMUSG00000116628	0	0	0	8.13703	3.03316	1.01426	0	4.06148	-4.4406	0.0217409	1	4930478L05Rik	16	78357204	78361757	+	1880	lncRNA	- && - && -	-
ENSMUSG00000117891	0	0	0	3.61646	8.08843	1.01426	0	4.23971	-4.49456	0.0184603	1	Gm41764	18	68231418	68251445	-	3452	lncRNA	- && - && -	-
ENSMUSG00000024673	0	0	0	9.94525	3.03316	4.05702	0	5.67848	-4.92252	0.00441566	1	Ms4a1	19	11227039	11243605	-	6187	protein_coding	- && P19437.1 RecName: Full=B-lymphocyte antigen CD20; AltName: Full=B-cell differentiation antigen Ly-44; AltName: Full=Lymphocyte antigen 44; AltName: Full=Membrane-spanning 4-domains subfamily A member 1; AltName: CD_antigen=CD20 && PF04103:CD20-like family	-
ENSMUSG00000006389	0	0	0	2.71234	9.09949	7.09979	0	6.30387	-5.06346	0.00258435	1	Mpl	4	118299612	118314710	-	3155	protein_coding	- && - && -	-
ENSMUSG00000092490	0	0	1.01252	18.0823	22.2432	1.01426	0.337506	13.7799	-5.23604	0.000530403	1	Gm20482	7	8858846	8865850	-	1644	transcribed_unprocessed_pseudogene	- && - && -	-
ENSMUSG00000069917	1.02112	1.03206	4.05008	100.357	89.9838	178.509	2.03442	122.95	-5.9105	1.21e-18	4.82e-15	Hba-a2	11	32246489	32247298	+	667	protein_coding	- && P01942.2 RecName: Full=Hemoglobin subunit alpha; AltName: Full=Alpha-globin; AltName: Full=Hemoglobin alpha chain && PF00042:Globin	-
ENSMUSG00000006574	0	0	0	29.8358	3.03316	11.1568	0	14.6752	-6.29258	2.33e-05	1	Slc4a1	11	102239650	102257029	-	4891	protein_coding	- && P04919.1 RecName: Full=Band 3 anion transport protein; AltName: Full=Anion exchange protein 1; Short=AE 1; Short=Anion exchanger 1; AltName: Full=MEB3; AltName: Full=Solute carrier family 4 member 1; AltName: CD_antigen=CD233 && PF00955:HCO3- transporter family|PF07565:Band 3 cytoplasmic domain	Band_3_cyto
ENSMUSG00000052305	0	0	39.4883	1985.43	1921	2367.27	13.1628	2091.24	-7.31145	0.00130941	0.127036	Hbb-bs	7	103475741	103477303	-	768	protein_coding	- && P02088.2 RecName: Full=Hemoglobin subunit beta-1; AltName: Full=Beta-1-globin; AltName: Full=Hemoglobin beta-1 chain; AltName: Full=Hemoglobin beta-major chain && PF00042:Globin	-
ENSMUSG00000069919	0	0	18.2253	1487.27	1238.54	1323.6	6.07512	1349.8	-7.79484	8.43e-05	0.0184845	Hba-a1	11	32233511	32234465	+	812	protein_coding	- && P01942.2 RecName: Full=Hemoglobin subunit alpha; AltName: Full=Alpha-globin; AltName: Full=Hemoglobin alpha chain && PF00042:Globin	-
ENSMUSG00000073940	0	0	0	231.453	188.056	338.761	0	252.757	-10.3926	5.38e-18	1.72e-14	Hbb-bt	7	103461731	103463203	-	703	protein_coding	- && P02088.2 RecName: Full=Hemoglobin subunit beta-1; AltName: Full=Beta-1-globin; AltName: Full=Hemoglobin beta-1 chain; AltName: Full=Hemoglobin beta-major chain && PF00042:Globin	-
Significantly up or down-regulated DEGs between OXL+NS and GS+NS group, values of gene expression were illustrated as normalized read count

## Sheet: GS_GeXIVAvsGS_NS_deg_all
gene_id	GS_GeXIVA_1	GS_GeXIVA_2	GS_GeXIVA_3	GS_NS_1	GS_NS_2	GS_NS_3	GS_GeXIVA	GS_NS	log2FoldChange	pvalue	padj	gene_name	gene_chr	gene_start	gene_end	gene_strand	gene_length	gene_biotype	gene_description	tf_family
ENSMUSG00000069045	1555.61	129.989	0	0	0	0	561.866	0	11.5375	0.0031461	0.0137685	Ddx3y	Y	1260771	1286629	-	5199	protein_coding	- && - && PF00271:Helicase conserved C-terminal domain|PF00270:DEAD/DEAH box helicase	DEAD
ENSMUSG00000069049	434.967	51.0326	0.913621	0	0	0	162.304	0	9.74602	0.00108042	0.00576546	Eif2s3y	Y	1010543	1028847	+	4161	protein_coding	- && Q9Z0N2.2 RecName: Full=Eukaryotic translation initiation factor 2 subunit 3, Y-linked; AltName: Full=Eukaryotic translation initiation factor 2 subunit gamma, Y-linked; Short=eIF-2-gamma Y; AltName: Full=Spermatogonial proliferation factor; Short=Spy && -	-
ENSMUSG00000056673	349.383	43.3296	0	0	0	0	130.904	0	9.43577	0.0157423	0.0501498	Kdm5d	Y	897788	956786	+	15164	protein_coding	- && - && -	-
ENSMUSG00000068457	289.978	14.4432	0	0	0	0	101.474	0	9.06836	0.0203033	0.0613248	Uty	Y	1096861	1245759	-	9791	protein_coding	- && P79457.2 RecName: Full=Histone demethylase UTY; AltName: Full=Male-specific histocompatibility antigen H-YDB; AltName: Full=Ubiquitously transcribed TPR protein on the Y chromosome; AltName: Full=Ubiquitously transcribed Y chromosome tetratricopeptide repeat protein && PF13414:TPR repeat|PF02373:JmjC domain, hydroxylase	JmjC
ENSMUSG00000079466	1.00687	174.281	78.5714	0	0	0	84.6198	0	8.80654	0.000948689	0.00518376	Prdm12	2	31530049	31545807	+	2471	protein_coding	- && - && -	-
ENSMUSG00000051207	1.00687	146.358	68.5216	0	0	0	71.962	0	8.5728	0.00108868	0.00579745	Mrgprd	7	144868572	144877823	+	3144	protein_coding	- && - && PF00001:7 transmembrane receptor (rhodopsin family)	7tm_1
ENSMUSG00000079278	7.04807	506.475	216.528	0	0	2.12618	243.35	0.708726	8.44229	5.04681e-05	0.000452234	Tmem233	5	116176814	116221305	-	2479	protein_coding	- && - && PF04505:Interferon-induced transmembrane protein	-
ENSMUSG00000034533	2.01373	925.327	422.093	0.949799	3.22245	0	449.811	1.39075	8.34246	4.6256e-05	0.000419032	Scn10a	9	119437522	119548388	-	7966	protein_coding	- && Q6QIY3.2 RecName: Full=Sodium channel protein type 10 subunit alpha; AltName: Full=Peripheral nerve sodium channel 3; Short=PN3; AltName: Full=Sensory neuron sodium channel; AltName: Full=Sodium channel protein type X subunit alpha; AltName: Full=Voltage-gated sodium channel subunit alpha Nav1.8 && PF00520:Ion transport protein|PF06512:Sodium ion transport-associated	Ion_trans
ENSMUSG00000085224	0	92.4364	54.8173	0	0	0	49.0846	0	8.02073	0.0401577	0.103454	Gm13425	2	31523465	31530601	-	5391	lncRNA	- && A2AJ77.1 RecName: Full=PR domain zinc finger protein 12; AltName: Full=PR domain-containing protein 12 && -	-
ENSMUSG00000041737	0	116.508	67.608	0.949799	0	0	61.3721	0.3166	7.38135	0.0103433	0.0361577	Tmem45b	9	31337492	31375758	-	4724	protein_coding	- && - && -	-
ENSMUSG00000068327	0	104.954	40.1993	0	0	1.06309	48.3844	0.354363	7.03831	0.0139214	0.0454926	Tlx2	6	83045305	83047274	-	1582	protein_coding	- && Q61663.1 RecName: Full=T-cell leukemia homeobox protein 2; AltName: Full=Enteric neuron homeobox protein; AltName: Full=Homeobox TLX-2; AltName: Full=Homeobox protein Hox-11L1; AltName: Full=Hox11L.1; AltName: Full=PMUR10F && PF00046:Homeobox domain	Homeobox
ENSMUSG00000034115	4.02747	403.446	258.555	0.949799	1.07415	3.18927	222.01	1.73774	7.0036	1.08906e-05	0.000124143	Scn11a	9	119582825	119654522	-	5931	protein_coding	- && - && PF00520:Ion transport protein|PF06512:Sodium ion transport-associated	Ion_trans
ENSMUSG00000114278	7.04807	44.2924	15.5316	0.949799	0	0	22.2907	0.3166	5.92099	1.95854e-05	1	Gm49027	5	123650145	123663551	-	1956	protein_coding	- && - && PF09057:Second Mitochondria-derived Activator of Caspases	-
ENSMUSG00000099560	0	53.9212	10.0498	0	1.07415	0	21.3237	0.35805	5.85626	0.0352217	1	Mrgprx3-ps	7	46959126	46960043	-	918	unprocessed_pseudogene	- && Q91ZC6.2 RecName: Full=Mas-related G-protein coupled receptor member A6 && PF00001:7 transmembrane receptor (rhodopsin family)	7tm_1
ENSMUSG00000028072	7.04807	335.082	113.289	3.7992	4.2966	5.31544	151.806	4.47041	5.08711	8.96276e-05	0.000730635	Ntrk1	3	87685551	87702469	-	2588	protein_coding	- && Q3UFB7.2 RecName: Full=High affinity nerve growth factor receptor; AltName: Full=Neurotrophic tyrosine kinase receptor type 1; Flags: Precursor && PF07714:Protein tyrosine kinase|PF16920:Tyrosine-protein kinase receptor C2 Ig-like domain|PF13855:Leucine rich repeat	Pkinase_Tyr
ENSMUSG00000025432	13.0893	612.391	310.631	5.6988	16.1123	7.44162	312.037	9.75089	5.00225	9.84191e-05	0.00078657	Avil	10	126836578	126856863	+	3398	protein_coding	- && - && PF00626:Gelsolin repeat|PF02209:Villin headpiece domain	-
ENSMUSG00000070691	2.01373	11.5546	14.6179	0.949799	0	0	9.39541	0.3166	4.67784	0.00252053	1	Runx3	4	134847963	134905301	+	5003	protein_coding	- && Q64131.3 RecName: Full=Runt-related transcription factor 3; AltName: Full=Acute myeloid leukemia 2 protein; AltName: Full=Core-binding factor subunit alpha-3; Short=CBF-alpha-3; AltName: Full=Oncogene AML-2; AltName: Full=Polyomavirus enhancer-binding protein 2 alpha C subunit; Short=PEA2-alpha C; Short=PEBP2-alpha C; AltName: Full=SL3-3 enhancer factor 1 alpha C subunit; AltName: Full=SL3/A…	-
ENSMUSG00000028794	5.03434	70.2902	26.495	0	3.22245	1.06309	33.9399	1.42851	4.61342	4.55136e-06	1	A3galt2	4	128649157	128663091	+	3588	protein_coding	- && - && PF03414:Glycosyltransferase family 6	-
ENSMUSG00000030200	0	10.5917	1.82724	0	0	0	4.13964	0	4.45397	0.0318336	1	Bcl2l14	6	134373281	134415699	+	4093	protein_coding	- && Q9CPT0.1 RecName: Full=Apoptosis facilitator Bcl-2-like protein 14; Short=Bcl2-L-14 && -	-
ENSMUSG00000022215	0	1.92576	10.0498	0	0	0	3.99187	0	4.40695	0.0350543	1	Fitm1	14	55813074	55814411	+	971	protein_coding	- && Q91V79.1 RecName: Full=Fat storage-inducing transmembrane protein 1; AltName: Full=Fat-inducing protein 1 && -	-
ENSMUSG00000107233	0	0.962879	10.9635	0	0	0	3.97545	0	4.40127	0.0391956	1	Gm42959	6	3190691	3190902	+	212	TEC	- && P03975.1 RecName: Full=IgE-binding protein && -	-
ENSMUSG00000007877	12.0824	0.962879	73.0897	0.949799	0	3.18927	28.7117	1.37969	4.38314	0.0170167	1	Tcap	11	98274637	98275779	+	948	protein_coding	- && O70548.1 RecName: Full=Telethonin; AltName: Full=Titin cap protein && PF09470:Telethonin protein	-
ENSMUSG00000108196	7.04807	0.962879	3.65449	0	0	0	3.88848	0	4.36025	0.0249559	1	Gm36328	6	134731209	134732155	+	432	lncRNA	- && - && -	-
ENSMUSG00000091412	6.0412	1.92576	3.65449	0	0	0	3.87382	0	4.35544	0.0224744	1	Gm2895	15	66841172	66884888	+	3194	lncRNA	- && - && -	-
novel.54	16.1099	0.962879	5.48173	0.949799	0	0	7.51816	0.3166	4.34829	0.00858849	1	-	13	21996347	22004298	-	906	-	- && - && -	-
ENSMUSG00000114469	5.03434	0.962879	5.48173	0	0	0	3.82631	0	4.3401	0.0256805	1	C730002L08Rik	19	20387908	20529694	-	5929	lncRNA	- && - && -	-
ENSMUSG00000100320	11.0755	5.77728	5.48173	0	0	1.06309	7.44485	0.354363	4.33539	0.0055775	1	Gm29417	18	35963442	35964146	-	571	lncRNA	- && - && -	-
ENSMUSG00000079168	3.0206	2.88864	5.48173	0	0	0	3.79699	0	4.33072	0.0231295	1	Cd209g	8	4184098	4187707	+	3610	protein_coding	- && - && -	-
ENSMUSG00000117313	7.04807	3.85152	0	0	0	0	3.6332	0	4.25974	0.0438938	1	Gm49838	17	28643697	28645404	-	1708	lncRNA	- && - && -	-
ENSMUSG00000018862	5.03434	3.85152	1.82724	0	0	0	3.57103	0	4.23694	0.0298958	1	Otop3	11	115225557	115237753	+	2426	protein_coding	- && - && PF03189:Otopetrin	-
ENSMUSG00000103658	2.01373	7.70303	0.913621	0	0	0	3.54346	0	4.22761	0.0363731	1	Gm37201	9	108037478	108038000	+	523	processed_pseudogene	- && Q91WK5.2 RecName: Full=Glycine cleavage system H protein, mitochondrial; AltName: Full=Lipoic acid-containing protein; Flags: Precursor && -	-
ENSMUSG00000093445	5.03434	0	5.48173	0	0	0	3.50536	0	4.21369	0.0474925	1	Lrch4	5	137627383	137639361	+	3925	protein_coding	- && Q921G6.1 RecName: Full=Leucine-rich repeat and calponin homology domain-containing protein 4 && -	-
ENSMUSG00000084863	3.0206	1.92576	5.48173	0	0	0	3.47603	0	4.20352	0.0328533	1	Gm12523	3	108191214	108192159	-	599	lncRNA	- && O54861.3 RecName: Full=Sortilin; AltName: Full=Glycoprotein 110; Short=Gp110; AltName: Full=Neurotensin receptor 3; Short=NTR3; Flags: Precursor && -	-
ENSMUSG00000085683	0	6.74016	3.65449	0	0	0	3.46488	0	4.19907	0.0494335	1	Tmem238l	11	66847464	66855842	+	1518	protein_coding	- && A6NJY4.2 RecName: Full=Putative transmembrane protein LOC100289255 && -	-
ENSMUSG00000029134	19.1305	10.5917	8.22259	0	1.07415	1.06309	12.6482	0.712413	4.19246	0.00115098	1	Plb1	5	32390052	32523864	+	11660	protein_coding	- && Q3TTY0.2 RecName: Full=Phospholipase B1, membrane-associated; Short=Phospholipase B; AltName: Full=Phospholipase B/lipase; Short=PLB/LIP; Includes: RecName: Full=Phospholipase A2; Includes: RecName: Full=Lysophospholipase; Flags: Precursor && PF00657:GDSL-like Lipase/Acylhydrolase	Lipase_GDSL
ENSMUSG00000115403	6.0412	0.962879	2.74086	0	0	0	3.24832	0	4.10021	0.0451289	1	Gm49304	14	48228985	48231260	-	1278	lncRNA	- && - && -	-
ENSMUSG00000081574	5.03434	1.92576	2.74086	0	0	0	3.23365	0	4.09449	0.0418578	1	Gm14429	2	177493945	177497296	-	2024	unprocessed_pseudogene	- && Q8BZW4.1 RecName: Full=Zinc finger protein 120; AltName: Full=Zinc finger protein 31; Short=mZF31 && PF01352:KRAB box	KRAB
ENSMUSG00000046275	25.1717	634.537	283.223	19.9458	17.1864	19.1356	314.311	18.7559	4.06659	0.000180973	0.00131677	Trarg1	11	76570634	76589490	+	3302	protein_coding	- && - && PF04505:Interferon-induced transmembrane protein	-
ENSMUSG00000097716	6.0412	4.8144	7.30897	0	0	1.06309	6.05486	0.354363	4.04077	0.0127396	1	1700026J14Rik	6	48513516	48514408	-	794	lncRNA	- && - && -	-
ENSMUSG00000070552	0	15.4061	2.74086	0	0	1.06309	6.04898	0.354363	4.03942	0.0265381	1	Mrgprx1	7	47670719	47677345	-	1180	protein_coding	- && - && PF00001:7 transmembrane receptor (rhodopsin family)	7tm_1
ENSMUSG00000001027	4.02747	8.66591	33.804	1.8996	0	1.06309	15.4991	0.987562	3.94039	0.000953746	1	Scn4a	11	106209418	106244114	-	7041	protein_coding	- && - && -	-
ENSMUSG00000048070	19.1305	901.255	347.176	22.7952	24.7055	37.2081	422.521	28.2362	3.90374	0.00137994	0.00706412	Pirt	11	66802807	66820702	+	4200	protein_coding	- && Q8BFY0.1 RecName: Full=Phosphoinositide-interacting protein && -	-
ENSMUSG00000117509	3.0206	8.66591	4.56811	0	0	1.06309	5.41821	0.354363	3.88056	0.0209452	1	Gm46606	17	83405447	83428170	-	738	lncRNA	- && - && -	-
ENSMUSG00000046518	6.0412	8.66591	0.913621	0	0	1.06309	5.20691	0.354363	3.81881	0.028647	1	Ferd3l	12	33978424	33979309	+	886	protein_coding	- && Q923Z4.1 RecName: Full=Fer3-like protein; AltName: Full=Basic helix-loop-helix protein N-twist; AltName: Full=Nephew of atonal 3; AltName: Full=Neuronal twist && PF00010:Helix-loop-helix DNA-binding domain	HLH
novel.85	8.05494	4.8144	2.74086	0	0	1.06309	5.2034	0.354363	3.81751	0.0243434	1	-	16	34503503	34505382	-	352	-	- && - && -	-
ENSMUSG00000065485	5.03434	2.88864	7.30897	0.949799	0	0	5.07732	0.3166	3.78767	0.0260578	1	Mir219a-2	2	29735643	29735739	-	97	miRNA	- && - && -	-
ENSMUSG00000102324	5.03434	5.77728	3.65449	0.949799	0	0	4.82203	0.3166	3.71032	0.0301003	1	Gm19721	9	107507975	107509738	-	1764	TEC	- && - && -	-
ENSMUSG00000055865	4.02747	21.1833	13.7043	0	2.1483	1.06309	12.9717	1.07046	3.64224	0.00197959	1	Tafa3	3	104674722	104689156	-	4484	protein_coding	- && - && -	-
ENSMUSG00000031162	9.06181	3.85152	0.913621	0	0	1.06309	4.60898	0.354363	3.64028	0.0428388	1	Gata1	X	7825499	7844310	-	2438	protein_coding	- && P17679.1 RecName: Full=Erythroid transcription factor; AltName: Full=Eryf1; AltName: Full=GATA-binding factor 1; Short=GATA-1; Short=GF-1; AltName: Full=NF-E1 DNA-binding protein && -	-
ENSMUSG00000059412	18.1236	435.221	203.738	21.8454	19.3347	11.694	219.028	17.6247	3.63473	0.000913631	0.00502681	Fxyd2	9	45310967	45321576	+	4005	protein_coding	- && Q04646.2 RecName: Full=Sodium/potassium-transporting ATPase subunit gamma; Short=Na(+)/K(+) ATPase subunit gamma; AltName: Full=FXYD domain-containing ion transport regulator 2; AltName: Full=Sodium pump gamma chain && -	-
ENSMUSG00000048108	3.0206	23.1091	24.6678	0	2.1483	2.12618	16.9325	1.42483	3.61081	0.00075601	1	Tmem72	6	116656024	116693874	-	17177	protein_coding	- && - && -	-
ENSMUSG00000106644	5.03434	3.85152	4.56811	0	1.07415	0	4.48465	0.35805	3.60646	0.0376245	1	Gm40331	5	126929821	126962380	+	217	lncRNA	- && - && -	-
ENSMUSG00000083458	2.01373	4.8144	6.39535	0	0	1.06309	4.40783	0.354363	3.58561	0.0421285	1	Gm5510	19	6202745	6203230	+	486	processed_pseudogene	- && - && PF15454:Late endosomal/lysosomal adaptor and MAPK and MTOR activator	-
ENSMUSG00000005952	6.0412	86.6591	41.113	2.8494	0	8.50471	44.6044	3.7847	3.56051	0.014661	0.0474571	Trpv1	11	73125118	73152068	+	3681	protein_coding	- && Q704Y3.1 RecName: Full=Transient receptor potential cation channel subfamily V member 1; Short=TrpV1; AltName: Full=Osm-9-like TRP channel 1; Short=OTRPC1; AltName: Full=Vanilloid receptor 1 && PF00520:Ion transport protein|PF12796:Ankyrin repeats (3 copies)	Ion_trans
ENSMUSG00000061808	4.02747	3.85152	4.56811	0	0	1.06309	4.14903	0.354363	3.49514	0.0479943	1	Ttr	18	20798337	20807378	+	1186	protein_coding	- && P07309.1 RecName: Full=Transthyretin; AltName: Full=Prealbumin; Flags: Precursor && PF00576:HIUase/Transthyretin family	-
novel.120	68.467	11.5546	6.39535	0.949799	3.22245	5.31544	28.8056	3.16256	3.20098	0.000266164	1	-	3	70697650	70714579	-	1236	-	- && P11369.2 RecName: Full=LINE-1 retrotransposable element ORF2 protein; Short=ORF2p; AltName: Full=Long interspersed element-1; Short=L1; AltName: Full=Retrovirus-related Pol polyprotein LINE-1; Includes: RecName: Full=Reverse transcriptase; Includes: RecName: Full=Endonuclease && -	-
ENSMUSG00000101013	13.0893	4.8144	9.13621	0	0	3.18927	9.0133	1.06309	3.11304	0.0145976	1	A630072M18Rik	5	21155987	21161396	+	5410	lncRNA	- && - && -	-
ENSMUSG00000086929	5.03434	6.74016	5.48173	0.949799	1.07415	0	5.75207	0.67465	3.07936	0.0388567	1	Gm11788	11	120380232	120383220	-	562	lncRNA	- && Q9QZD8.2 RecName: Full=Mitochondrial dicarboxylate carrier; AltName: Full=Solute carrier family 25 member 10 && -	-
ENSMUSG00000032561	26.1785	454.479	220.183	25.6446	24.7055	32.9557	233.613	27.7686	3.07287	0.00201093	0.00958192	Acpp	9	104165450	104214947	-	7330	protein_coding	- && - && PF00328:Histidine phosphatase superfamily (branch 2)	Acid_phosphat_A
ENSMUSG00000040901	0	21.1833	4.56811	0	1.07415	2.12618	8.58382	1.06678	3.03725	0.0351453	1	Kcnk18	19	59207646	59225806	+	3470	protein_coding	- && Q6VV64.1 RecName: Full=Potassium channel subfamily K member 18; AltName: Full=Two-pore-domain potassium channel TRESK && PF07885:Ion channel	Ion_trans_2
ENSMUSG00000040434	3.0206	7.70303	6.39535	0	2.1483	0	5.70633	0.7161	3.03715	0.0486507	1	Large2	2	92195391	92205214	-	5837	protein_coding	- && - && PF13896:Glycosyl-transferase for dystroglycan|PF01501:Glycosyl transferase family 8	Glyco_transf_8
ENSMUSG00000043017	6.0412	45.2553	16.4452	0.949799	3.22245	4.25235	22.5806	2.8082	3.02775	0.000483327	1	Ptgir	7	16640415	16644830	+	3334	protein_coding	- && P43252.1 RecName: Full=Prostacyclin receptor; AltName: Full=Prostaglandin I2 receptor; Short=PGI receptor; Short=PGI2 receptor; AltName: Full=Prostanoid IP receptor; Flags: Precursor && -	-
ENSMUSG00000071340	1.00687	83.7705	45.6811	2.8494	6.4449	7.44162	43.4861	5.57864	2.96644	0.0299669	0.0826502	Trappc3l	10	33913593	33985811	+	1343	protein_coding	- && Q4KL14.1 RecName: Full=Trafficking protein particle complex subunit 3-like protein; Short=TRAPPC3-like protein; AltName: Full=BET3-like protein && PF04051:Transport protein particle (TRAPP) component	TRAPP_Bet3
ENSMUSG00000087001	13.0893	6.74016	3.65449	0.949799	0	2.12618	7.82797	1.02533	2.92748	0.0234918	1	Gm15475	6	84070754	84083989	-	3757	lncRNA	- && Q9ESD7.3 RecName: Full=Dysferlin; AltName: Full=Dystrophy-associated fer-1-like protein; AltName: Full=Fer-1-like protein 1 && -	-
ENSMUSG00000004655	28.1923	233.017	190.033	29.4438	11.8157	20.1987	150.414	20.486	2.87432	0.0010903	0.00580403	Aqp1	6	55313417	55325540	+	2627	protein_coding	- && Q02013.3 RecName: Full=Aquaporin-1; Short=AQP-1; AltName: Full=Aquaporin-CHIP; AltName: Full=Delayed early response protein 2; Short=DER2; AltName: Full=Water channel protein for red blood cells and kidney proximal tubule && -	-
ENSMUSG00000112278	48.3296	28.8864	46.5947	4.749	5.37075	7.44162	41.2702	5.85379	2.82347	2.93245e-07	5.70635e-06	Gm30025	12	80481983	80482710	+	728	lncRNA	- && - && -	-
ENSMUSG00000038276	12.0824	77.0303	44.7675	4.749	5.37075	9.5678	44.6267	6.56252	2.77338	1.11999e-05	0.000126817	Asic3	5	24618390	24622833	+	2423	protein_coding	- && - && PF00858:Amiloride-sensitive sodium channel	-
ENSMUSG00000108452	60.412	42.3667	73.0897	12.3474	10.7415	3.18927	58.6228	8.75939	2.73204	1.34311e-08	4.09202e-07	4930413G21Rik	7	122568281	122569273	-	993	TEC	- && - && -	-
ENSMUSG00000113234	6.0412	9.62879	4.56811	0	0	3.18927	6.74603	1.06309	2.69277	0.0482092	1	Gm49330	12	18043134	18043259	+	126	unprocessed_pseudogene	- && Q7SIG6.3 RecName: Full=Arf-GAP with SH3 domain, ANK repeat and PH domain-containing protein 2; AltName: Full=Development and differentiation-enhancing factor 2; AltName: Full=Paxillin-associated protein with ARF GAP activity 3; Short=PAG3; AltName: Full=Pyk2 C-terminus-associated protein; Short=PAP && -	-
ENSMUSG00000030592	16.1099	17.3318	144.352	5.6988	10.7415	11.694	59.2646	9.37809	2.66357	0.0131503	0.0434721	Ryr1	7	28702769	28824604	-	21838	protein_coding	- && E9PZQ0.1 RecName: Full=Ryanodine receptor 1; Short=RYR-1; Short=RyR1; AltName: Full=Skeletal muscle calcium release channel; AltName: Full=Skeletal muscle ryanodine receptor; AltName: Full=Skeletal muscle-type ryanodine receptor; AltName: Full=Type 1 ryanodine receptor && PF02026:RyR domain|PF08454:RyR and IP3R Homology associated|PF13833:EF-hand domain pair|PF08709:Inositol 1,4,5-trisphosph…	SPRY
ENSMUSG00000034127	12.0824	84.7334	42.0266	11.3976	0	10.6309	46.2808	7.34283	2.65265	0.0468252	0.116684	Tspan8	10	115652737	115685798	+	1702	protein_coding	- && Q8R3G9.1 RecName: Full=Tetraspanin-8; Short=Tspan-8 && PF00335:Tetraspanin family	Tetraspannin
ENSMUSG00000103486	11.0755	13.4803	10.9635	1.8996	1.07415	3.18927	11.8398	2.05434	2.52783	0.00757666	1	Gm10657	9	58462082	58463112	+	1031	TEC	- && - && -	-
ENSMUSG00000016255	42.2884	7.70303	2.74086	1.8996	3.22245	4.25235	17.5774	3.1248	2.49531	0.0088793	1	Tubb1	2	174292488	174299675	+	1406	protein_coding	- && A2AQ07.1 RecName: Full=Tubulin beta-1 chain && PF00091:Tubulin/FtsZ family, GTPase domain|PF03953:Tubulin C-terminal domain	Tubulin
ENSMUSG00000103403	11.0755	10.5917	1.82724	0	1.07415	3.18927	7.83149	1.42114	2.48545	0.0472249	1	Gm37931	1	74347007	74349872	+	2866	TEC	- && - && -	-
ENSMUSG00000020125	15.103	4.8144	2.74086	1.8996	0	2.12618	7.55276	1.34193	2.47253	0.0489599	1	Elane	10	79722081	79724049	+	984	protein_coding	- && - && PF00089:Trypsin	Trypsin
ENSMUSG00000025172	5.03434	7.70303	9.13621	1.8996	1.07415	1.06309	7.2912	1.34561	2.42698	0.039455	1	Ankrd2	19	42024439	42033549	+	1138	protein_coding	- && - && PF12796:Ankyrin repeats (3 copies)	-
ENSMUSG00000115970	10.0687	13.4803	9.13621	1.8996	0	4.25235	10.8951	2.05065	2.4086	0.0165095	1	8430426J06Rik	15	81126858	81197067	-	1712	lncRNA	- && - && -	-
ENSMUSG00000033196	1.00687	0.962879	40.1993	3.7992	1.07415	3.18927	14.0564	2.68754	2.3839	0.0409189	1	Myh2	11	67061853	67088343	+	7137	protein_coding	- && Q9BE41.1 RecName: Full=Myosin-2; AltName: Full=Myosin heavy chain 2; AltName: Full=Myosin heavy chain 2a; Short=MyHC-2a; AltName: Full=Myosin heavy chain, skeletal muscle, adult 2 && PF02736:Myosin N-terminal SH3-like domain|PF00063:Myosin head (motor domain)|PF01576:Myosin tail	Myosin_head
ENSMUSG00000086924	8.05494	15.4061	8.22259	0.949799	0	5.31544	10.5612	2.08841	2.35054	0.0249736	1	Gm11766	11	119829337	119832900	+	3018	lncRNA	- && - && -	-
ENSMUSG00000029372	202.38	38.5152	9.13621	14.247	17.1864	18.0725	83.3439	16.502	2.33623	0.038154	0.0993097	Ppbp	5	90916377	90917922	+	1083	protein_coding	- && P43030.1 RecName: Full=Platelet basic protein; Short=PBP; AltName: Full=C-X-C motif chemokine 7; AltName: Full=Small-inducible cytokine B7; Flags: Precursor && PF00048:Small cytokines (intecrine/chemokine), interleukin-8 like	-
ENSMUSG00000034683	19.1305	333.156	153.488	41.7912	27.9279	30.8296	168.592	33.5162	2.33015	0.0193457	0.0589994	Ppp1r1c	2	79538124	79648840	+	5826	protein_coding	- && - && -	-
ENSMUSG00000002228	23.1579	121.323	85.8804	11.3976	15.0381	20.1987	76.7871	15.5448	2.3107	2.42131e-06	3.45793e-05	Ppm1j	3	104688372	104693334	+	1814	protein_coding	- && Q149T7.1 RecName: Full=Protein phosphatase 1J; AltName: Full=Protein phosphatase 2C isoform zeta; Short=PP2C-zeta && PF00481:Protein phosphatase 2C	PP2C
ENSMUSG00000087249	6.0412	14.4432	10.0498	1.8996	2.1483	2.12618	10.1781	2.05803	2.31014	0.0197064	1	Gm16062	11	59700906	59709317	+	771	lncRNA	- && - && -	-
ENSMUSG00000115424	1.00687	18.2947	10.0498	1.8996	2.1483	2.12618	9.7838	2.05803	2.25412	0.0405976	1	D130079A08Rik	14	104525867	104696772	-	7110	lncRNA	- && - && -	-
ENSMUSG00000054342	21.1442	29.8493	30.1495	9.49799	3.22245	4.25235	27.0477	5.6576	2.23878	0.000316649	1	Kcnn4	7	24069688	24086115	+	5115	protein_coding	- && - && PF07885:Ion channel|PF02888:Calmodulin binding domain|PF03530:Calcium-activated SK potassium channel	Ion_trans_2
ENSMUSG00000019464	14.0961	7.70303	7.30897	0.949799	3.22245	2.12618	9.70272	2.09948	2.22271	0.0274242	1	Ptger1	8	84393307	84399382	+	5459	protein_coding	- && P35375.1 RecName: Full=Prostaglandin E2 receptor EP1 subtype; Short=PGE receptor EP1 subtype; Short=PGE2 receptor EP1 subtype; AltName: Full=Prostanoid EP1 receptor && -	-
ENSMUSG00000060981	30.206	29.8493	23.7542	8.5482	4.2966	5.31544	27.9365	6.05341	2.19284	0.000213414	1	H4c8	13	23715220	23715689	+	470	protein_coding	- && Q6WV72.3 RecName: Full=Histone H4 >Q6WV73.3 RecName: Full=Histone H4 >Q6WV90.3 RecName: Full=Histone H4 >Q7K8C0.3 RecName: Full=Histone H4 >Q7KQD1.3 RecName: Full=Histone H4 >P62802.2 RecName: Full=Histone H4 >P62804.2 RecName: Full=Histone H4; Contains: RecName: Full=Osteogenic growth peptide; Short=OGP >P62794.2 RecName: Full=Histone H4 >P62795.2 RecName: Full=Histone H4 >P62796.2 RecName:…	-
ENSMUSG00000027071	17.1167	199.316	103.239	18.996	27.9279	23.3879	106.557	23.4373	2.18584	0.0149853	0.0482583	P2rx3	2	84828927	84867806	-	2789	protein_coding	- && - && PF00864:ATP P2X receptor	-
ENSMUSG00000038775	31.2129	24.072	32.8904	7.5984	5.37075	6.37853	29.3917	6.44923	2.18296	0.00013615	1	Vill	9	118881846	118900593	+	4409	protein_coding	- && - && -	-
ENSMUSG00000027913	14.0961	6.74016	10.9635	2.8494	3.22245	1.06309	10.5999	2.37831	2.15018	0.0241389	1	Crct1	3	92921512	92922994	-	792	protein_coding	- && - && PF15845:Cysteine-rich C-terminal 1 family	-
ENSMUSG00000020660	36.2472	13.4803	22.8405	4.749	4.2966	7.44162	24.1894	5.49574	2.13898	0.00118494	1	Pomc	12	4004951	4010642	+	1318	protein_coding	- && P01193.1 RecName: Full=Pro-opiomelanocortin; Short=POMC; AltName: Full=Corticotropin-lipotropin; Contains: RecName: Full=NPP; Contains: RecName: Full=Melanotropin gamma; AltName: Full=Gamma-MSH; Contains: RecName: Full=Corticotropin; AltName: Full=Adrenocorticotropic hormone; Short=ACTH; Contains: RecName: Full=Melanotropin alpha; AltName: Full=Alpha-MSH; Contains: RecName: Full=Corticotropi…	-
ENSMUSG00000023903	11.0755	94.3622	41.113	21.8454	3.22245	8.50471	48.8502	11.1908	2.12043	0.0439737	0.111063	Mmp25	17	23847285	23864251	-	5303	protein_coding	- && Q3U435.1 RecName: Full=Matrix metalloproteinase-25; Short=MMP-25; Flags: Precursor && -	-
ENSMUSG00000036526	8.05494	4.8144	13.7043	1.8996	2.1483	2.12618	8.85789	2.05803	2.11092	0.0409612	1	Card11	5	140858745	140986337	-	4866	protein_coding	- && Q8CIS0.2 RecName: Full=Caspase recruitment domain-containing protein 11 && PF00619:Caspase recruitment domain	CARD
ENSMUSG00000000120	173.181	695.199	382.807	111.127	68.7456	110.561	417.062	96.8111	2.10673	0.000374974	0.00240945	Ngfr	11	95459644	95478561	-	3446	protein_coding	- && Q9Z0W1.1 RecName: Full=Tumor necrosis factor receptor superfamily member 16; AltName: Full=Low affinity neurotrophin receptor p75NTR; AltName: Full=Low-affinity nerve growth factor receptor; Short=NGF receptor; AltName: CD_antigen=CD271; Flags: Precursor && -	-
ENSMUSG00002075524	6.0412	11.5546	11.8771	1.8996	2.1483	3.18927	9.82428	2.41239	2.03419	0.0343831	1	-	9	56130999	56131055	-	57	miRNA	- && - && -	-
ENSMUSG00000024366	4.02747	37.5523	17.3588	1.8996	0	12.7571	19.6462	4.88555	2.01743	0.0291102	1	Gfra3	18	34822951	34853440	-	1997	protein_coding	- && - && PF02351:GDNF/GAS1 domain	-
ENSMUSG00000039376	13.0893	6.74016	16.4452	2.8494	2.1483	4.25235	12.0915	3.08335	1.97405	0.0238143	1	Synpo2l	14	20709014	20718422	-	4629	protein_coding	- && Q8BWB1.1 RecName: Full=Synaptopodin 2-like protein && PF00595:PDZ domain (Also known as DHR or GLGF)	PDZ
ENSMUSG00000084093	37.2541	36.5894	55.7309	14.247	11.8157	7.44162	43.1915	11.1681	1.94633	3.83744e-05	0.000358787	Gm16418	1	166259274	166259444	-	171	processed_pseudogene	- && Q9CPX8.1 RecName: Full=Cytochrome b-c1 complex subunit 10; AltName: Full=Complex III subunit 10; AltName: Full=Complex III subunit XI; AltName: Full=Ubiquinol-cytochrome c reductase complex 6.4 kDa protein && -	-
ENSMUSG00000060467	8.05494	14.4432	8.22259	2.8494	2.1483	3.18927	10.2402	2.72899	1.90604	0.038698	1	Gm10080	9	44286041	44286478	-	438	processed_pseudogene	- && Q64119.3 RecName: Full=Myosin light polypeptide 6; AltName: Full=17 kDa myosin light chain; Short=LC17; AltName: Full=Myosin light chain 3; Short=MLC-3; AltName: Full=Myosin light chain alkali 3; Short=Myosin light chain A3; AltName: Full=Smooth muscle and nonmuscle myosin light chain alkali 6 && PF13405:EF-hand domain	-
ENSMUSG00000068335	29.1991	48.144	29.2359	11.3976	3.22245	13.8202	35.5263	9.48007	1.89981	0.000483919	0.00298608	Dok1	6	83007915	83010452	-	1977	protein_coding	- && P97465.2 RecName: Full=Docking protein 1; AltName: Full=Downstream of tyrosine kinase 1; AltName: Full=p62(dok) && PF02174:PTB domain (IRS-1 type)|PF00169:PH domain	PH
ENSMUSG00000004610	73.5013	69.3273	92.2758	23.745	17.1864	22.3249	78.3681	21.0854	1.89144	3.99252e-08	1.0188e-06	Etfb	7	43093507	43107224	+	1164	protein_coding	- && - && PF01012:Electron transfer flavoprotein domain	-
ENSMUSG00000030890	27.1854	18.2947	30.1495	7.5984	7.51905	5.31544	25.2099	6.81096	1.88589	0.00152698	1	Ilk	7	105385799	105392132	+	2744	protein_coding	- && Q99J82.1 RecName: Full=Integrin-linked protein kinase >O55222.2 RecName: Full=Integrin-linked protein kinase && PF12796:Ankyrin repeats (3 copies)|PF07714:Protein tyrosine kinase|PF13857:Ankyrin repeats (many copies)	Pkinase_Tyr
ENSMUSG00000032318	35.2404	228.202	154.402	34.1928	31.1504	47.839	139.282	37.7274	1.88494	0.0106229	0.0368624	Isl2	9	55445956	55453464	+	2193	protein_coding	- && - && PF00046:Homeobox domain|PF00412:LIM domain	LIM
ENSMUSG00000053916	34.2335	19.2576	14.6179	1.8996	4.2966	12.7571	22.703	6.31775	1.85692	0.00790604	1	Nanp	2	150871605	150881318	-	1488	protein_coding	- && Q9CPT3.1 RecName: Full=N-acylneuraminate-9-phosphatase; AltName: Full=Haloacid dehalogenase-like hydrolase domain-containing protein 4; AltName: Full=Neu5Ac-9-Pase && PF13419:Haloacid dehalogenase-like hydrolase	-
ENSMUSG00000086688	27.1854	23.1091	22.8405	8.5482	6.4449	5.31544	24.3784	6.76951	1.84061	0.00190398	1	Gm11560	11	99822988	99823935	+	948	processed_pseudogene	- && - && -	-
ENSMUSG00000111875	8.05494	13.4803	28.3223	4.749	5.37075	4.25235	16.6192	4.7907	1.79996	0.0173208	1	Gm5425	10	84144750	84145208	+	459	processed_pseudogene	- && Q01768.1 RecName: Full=Nucleoside diphosphate kinase B; Short=NDK B; Short=NDP kinase B; AltName: Full=Histidine protein kinase NDKB; AltName: Full=P18; AltName: Full=nm23-M2 && -	-
ENSMUSG00000004371	16.1099	12.5174	10.0498	4.749	1.07415	5.31544	12.8924	3.71286	1.78526	0.0312706	1	Il11	7	4775372	4785858	-	2081	protein_coding	- && P47873.1 RecName: Full=Interleukin-11; Short=IL-11; Flags: Precursor && PF07400:Interleukin 11	-
ENSMUSG00000059406	7.04807	12.5174	15.5316	2.8494	2.1483	5.31544	11.699	3.43771	1.77354	0.039518	1	Tmprss9	10	80707682	80735326	+	3812	protein_coding	- && P69525.1 RecName: Full=Transmembrane protease serine 9; AltName: Full=Polyserase-I; AltName: Full=Polyserine protease 1; Short=Polyserase-1; Contains: RecName: Full=Serase-1; Contains: RecName: Full=Serase-2; Contains: RecName: Full=Serase-3 && PF01390:SEA domain|PF00089:Trypsin|PF00057:Low-density lipoprotein receptor domain class A	Trypsin
ENSMUSG00000047671	11.0755	15.4061	11.8771	3.7992	5.37075	2.12618	12.7862	3.76538	1.76474	0.0293843	1	Dynlt4	4	116983991	116985935	+	1111	protein_coding	- && Q8CDY7.1 RecName: Full=Tctex1 domain-containing protein 4 && PF03645:Tctex-1 family	-
ENSMUSG00002076161	27.1854	94.3622	53.9037	7.5984	15.0381	29.7665	58.4838	17.4677	1.75296	0.000497476	0.00304822	7SK	9	78082585	78082915	-	331	misc_RNA	- && - && -	-
ENSMUSG00000067714	12.0824	21.1833	21.0133	7.5984	2.1483	6.37853	18.093	5.37508	1.7419	0.0134425	1	Lpar5	6	125044883	125059435	+	1515	protein_coding	- && Q149R9.2 RecName: Full=Lysophosphatidic acid receptor 5; Short=LPA receptor 5; Short=LPA-5; AltName: Full=G-protein coupled receptor 92 && PF00001:7 transmembrane receptor (rhodopsin family)	7tm_1
ENSMUSG00000052241	10.0687	20.2205	13.7043	3.7992	1.07415	8.50471	14.6645	4.45935	1.72009	0.0319281	1	A930035D04Rik	6	47430710	47431254	-	543	pseudogene	- && - && -	-
ENSMUSG00000002769	14.0961	19.2576	30.1495	5.6988	7.51905	6.37853	21.1677	6.53213	1.70307	0.00772428	1	Gnmt	17	47036590	47040094	-	1206	protein_coding	- && - && PF13847:Methyltransferase domain	-
ENSMUSG00000060600	74.5082	78.9561	367.276	62.6868	39.7436	58.4699	173.58	53.6334	1.69446	0.0297687	0.0822539	Eno3	11	70548028	70553339	+	1739	protein_coding	- && - && PF00113:Enolase, C-terminal TIM barrel domain|PF03952:Enolase, N-terminal domain	-
ENSMUSG00000001420	24.1648	89.5478	41.113	6.6486	19.3347	22.3249	51.6085	16.1027	1.69062	0.00117091	0.00615651	Tmem79	3	88235962	88243455	-	2912	protein_coding	- && Q9D709.1 RecName: Full=Transmembrane protein 79; AltName: Full=Mattrin && -	-
ENSMUSG00000000320	78.5356	27.9235	18.2724	17.0964	8.59321	12.7571	41.5772	12.8156	1.68776	0.00248981	0.0114548	Alox12	11	70132283	70146179	-	4085	protein_coding	- && P39655.4 RecName: Full=Arachidonate 12-lipoxygenase, 12S-type; Short=12S-LOX; Short=12S-lipoxygenase; AltName: Full=Lipoxin synthase 12-LO; AltName: Full=Platelet-type lipoxygenase 12; Short=P-12LO && PF00305:Lipoxygenase|PF01477:PLAT/LH2 domain	Lipoxygenase
ENSMUSG00000081965	11.0755	16.3689	22.8405	1.8996	11.8157	2.12618	16.7617	5.28048	1.6848	0.0309082	1	Gm11620	11	105055602	105057446	-	1845	processed_pseudogene	- && Q9CS00.2 RecName: Full=Cactin && -	-
ENSMUSG00000059278	200.367	260.94	329.817	98.7791	91.3028	56.3437	263.708	82.1419	1.681	5.52082e-13	6.40457e-11	Naa38	11	69286313	69287506	+	890	protein_coding	- && - && PF01423:LSM domain	LSM
ENSMUSG00000020911	17.1167	17.3318	13.7043	8.5482	1.07415	5.31544	16.051	4.97926	1.66965	0.0259739	1	Krt19	11	100031636	100039491	-	1855	protein_coding	- && P19001.1 RecName: Full=Keratin, type I cytoskeletal 19; AltName: Full=Cytokeratin-19; Short=CK-19; AltName: Full=Keratin-19; Short=K19 && -	-
ENSMUSG00000022952	36.2472	101.102	65.7807	24.6948	21.483	19.1356	67.7101	21.7711	1.63573	6.0067e-05	0.00052302	Runx1	16	92398354	92623037	-	12025	protein_coding	- && - && -	-
ENSMUSG00000001739	20.1373	13.4803	7.30897	6.6486	3.22245	3.18927	13.6422	4.35344	1.63095	0.0412115	1	Cldn15	5	136995470	137004712	+	2124	protein_coding	- && Q9Z0S5.2 RecName: Full=Claudin-15 && PF00822:PMP-22/EMP/MP20/Claudin family	-
ENSMUSG00000061462	14.0961	16.3689	95.9303	13.2972	15.0381	12.7571	42.1318	13.6975	1.62565	0.00902751	0.0324461	Obscn	11	58885082	59029996	-	29422	protein_coding	- && A2AAJ9.2 RecName: Full=Obscurin; AltName: Full=Obscurin-RhoGEF; AltName: Full=Obscurin-myosin light chain kinase; Short=Obscurin-MLCK && PF00069:Protein kinase domain|PF07679:Immunoglobulin I-set domain|PF00621:RhoGEF domain|PF00041:Fibronectin type III domain	Pkinase
ENSMUSG00000025401	8.05494	27.9235	27.4086	5.6988	5.37075	9.5678	21.129	6.87912	1.62559	0.015873	1	Myo1a	10	127541039	127556809	+	3714	protein_coding	- && - && PF06017:Unconventional myosin tail, actin- and lipid-binding|PF00063:Myosin head (motor domain)	Myosin_head
ENSMUSG00000081673	17.1167	28.8864	13.7043	7.5984	6.4449	5.31544	19.9025	6.45291	1.61981	0.0129798	1	Gm14794	X	87793058	87793249	+	192	processed_pseudogene	- && Q91VR2.1 RecName: Full=ATP synthase subunit gamma, mitochondrial; AltName: Full=F-ATPase gamma subunit; Flags: Precursor && -	-
ENSMUSG00000110528	40.2747	23.1091	43.8538	9.49799	10.7415	14.8832	35.7459	11.7076	1.61499	0.00115098	0.00607132	Gm1943	8	110067323	110067496	-	174	processed_pseudogene	- && Q5EB92.1 RecName: Full=WD repeat-containing protein 70 && -	-
ENSMUSG00000086043	35.2404	33.7008	59.3854	14.247	9.66736	18.0725	42.7755	13.9956	1.61313	0.000489753	0.00301099	Gm12473	4	43631539	43641533	-	579	lncRNA	- && - && -	-
ENSMUSG00000117648	18.1236	19.2576	27.4086	9.49799	3.22245	8.50471	21.5966	7.07505	1.60281	0.0108427	1	Gm32282	17	78506685	78507454	-	528	lncRNA	- && - && -	-
ENSMUSG00000041831	24.1648	29.8493	18.2724	3.7992	6.4449	13.8202	24.0955	8.02142	1.59702	0.00922676	1	Sytl3	17	6926492	7005443	+	5062	protein_coding	- && Q99N48.2 RecName: Full=Synaptotagmin-like protein 3; AltName: Full=Exophilin-6 && PF00168:C2 domain|PF02318:FYVE-type zinc finger	C2
ENSMUSG00000021697	50.3434	37.5523	75.8306	18.0462	20.4089	15.9463	54.5754	18.1338	1.59186	0.00011424	0.000890367	Depdc1b	13	108452866	108544316	+	3350	protein_coding	- && - && -	-
ENSMUSG00000107770	11.0755	7.70303	58.4718	6.6486	4.2966	14.8832	25.7501	8.60948	1.58777	0.0329042	1	Gm44126	6	76261399	76261912	+	514	processed_pseudogene	- && Q91XL3.1 RecName: Full=UDP-glucuronic acid decarboxylase 1; AltName: Full=UDP-glucuronate decarboxylase 1; Short=UGD; Short=UXS-1 && PF16363:GDP-mannose 4,6 dehydratase|PF11803:UDP-glucuronate decarboxylase N-terminal	-
ENSMUSG00000028716	14.0961	19.2576	6.39535	5.6988	3.22245	4.25235	13.2497	4.3912	1.5831	0.0480937	1	Pdzk1ip1	4	114945905	114951096	+	1778	protein_coding	- && Q9CQH0.1 RecName: Full=PDZK1-interacting protein 1; AltName: Full=17 kDa membrane-associated protein && PF15807:Membrane-associated protein 117 kDa, PDZK1-interacting protein 1	-
ENSMUSG00000091204	6.0412	43.3296	21.0133	7.5984	10.7415	5.31544	23.4614	7.88511	1.57618	0.0233444	1	Gm7271	5	76631887	76664496	+	836	protein_coding	- && - && PF15277:Exocyst complex component SEC3 N-terminal PIP2 binding PH	-
ENSMUSG00000002580	131.9	207.019	256.728	67.4358	82.7096	49.9652	198.549	66.7035	1.57543	1.92808e-09	7.34276e-08	Mien1	11	98328534	98329817	-	747	protein_coding	- && - && PF10262:Rdx family	-
ENSMUSG00000118426	9.06181	30.8121	38.3721	12.3474	6.4449	7.44162	26.082	8.74464	1.57205	0.0124058	1	Gm2102	1	78193369	78194113	-	745	processed_pseudogene	- && - && PF14634:zinc-RING finger domain	-
novel.108	10.0687	18.2947	17.3588	4.749	4.2966	6.37853	15.2407	5.14138	1.57139	0.029985	1	-	2	144670700	144762508	+	390	-	- && - && -	-
ENSMUSG00000074274	11.0755	48.144	30.1495	4.749	10.7415	14.8832	29.7897	10.1246	1.5685	0.0106575	1	D930028M14Rik	7	24851882	24856052	+	1071	lncRNA	- && - && -	-
ENSMUSG00000030474	11.0755	15.4061	15.5316	5.6988	3.22245	5.31544	14.0044	4.74556	1.5571	0.0370326	1	Siglece	7	43300494	43309585	-	1849	protein_coding	- && - && -	-
ENSMUSG00000045725	35.2404	29.8493	37.4585	10.4478	7.51905	17.0094	34.1827	11.6588	1.55382	0.00168333	0.00831248	Prr15	6	54302820	54307186	+	3157	protein_coding	- && - && PF15321:ATPase family AAA domain containing 4	-
ENSMUSG00000000958	53.364	116.508	66.6944	20.8956	35.447	25.5141	78.8556	27.2856	1.53626	3.70924e-05	0.000349619	Slc7a7	14	54606899	54655237	-	3315	protein_coding	- && Q9Z1K8.1 RecName: Full=Y+L amino acid transporter 1; AltName: Full=Solute carrier family 7 member 7; AltName: Full=y(+)L-type amino acid transporter 1; Short=Y+LAT1; Short=y+LAT-1 && PF13520:Amino acid permease	-
ENSMUSG00000020018	76.5219	73.1788	163.538	51.2892	25.7796	30.8296	104.413	35.9661	1.53312	2.27128e-05	0.00023254	Snrpf	10	93418891	93425568	-	861	protein_coding	- && P62321.1 RecName: Full=Small nuclear ribonucleoprotein F; Short=snRNP-F; AltName: Full=Sm protein F; Short=Sm-F; Short=SmF >P62306.1 RecName: Full=Small nuclear ribonucleoprotein F; Short=snRNP-F; AltName: Full=Sm protein F; Short=Sm-F; Short=SmF >P62307.1 RecName: Full=Small nuclear ribonucleoprotein F; Short=snRNP-F; AltName: Full=Sm protein F; Short=Sm-F; Short=SmF >Q3T0Z8.2 RecName: Full…	-
ENSMUSG00000025723	23.1579	96.2879	49.3356	19.9458	16.1123	22.3249	56.2605	19.461	1.53206	0.00118962	0.00624241	Nmb	7	80551975	80554824	-	793	protein_coding	- && - && PF02044:Bombesin-like peptide	Bombesin
novel.216	123.845	97.2508	73.0897	40.8414	19.3347	41.4605	98.0617	33.8788	1.52717	4.43025e-06	5.78707e-05	-	X	168960833	169015066	-	843	-	- && P50427.1 RecName: Full=Steryl-sulfatase; AltName: Full=Arylsulfatase C; Short=ASC; AltName: Full=Steroid sulfatase; AltName: Full=Steryl-sulfate sulfohydrolase; Flags: Precursor && PF00884:Sulfatase	Sulfatase
ENSMUSG00000025257	23.1579	22.1462	18.2724	12.3474	7.51905	2.12618	21.1922	7.33087	1.51595	0.0191969	1	Ribc1	X	150787578	150799291	-	1547	protein_coding	- && Q9D0B8.1 RecName: Full=RIB43A-like with coiled-coils protein 1 && PF05914:RIB43A	-
ENSMUSG00000042448	11.0755	15.4061	28.3223	8.5482	7.51905	3.18927	18.268	6.41884	1.50614	0.0296382	1	Hoxd1	2	74593324	74595486	+	1862	protein_coding	- && Q01822.2 RecName: Full=Homeobox protein Hox-D1; AltName: Full=Homeobox protein Hox-4.9 && PF00046:Homeobox domain	Homeobox
novel.215	48.3296	49.1068	41.113	18.0462	8.59321	22.3249	46.1831	16.3214	1.49668	0.000553774	0.00332993	-	X	168909029	168910388	-	431	-	- && P50427.1 RecName: Full=Steryl-sulfatase; AltName: Full=Arylsulfatase C; Short=ASC; AltName: Full=Steroid sulfatase; AltName: Full=Steryl-sulfate sulfohydrolase; Flags: Precursor && PF00884:Sulfatase	Sulfatase
ENSMUSG00000079941	162.106	206.056	272.259	101.629	84.8579	40.3974	213.474	75.6279	1.49406	5.08138e-08	1.26248e-06	Cox5b-ps	13	21685199	21685588	-	390	protein_coding	- && P12075.2 RecName: Full=Cytochrome c oxidase subunit 5B, mitochondrial; AltName: Full=Cytochrome c oxidase polypeptide Vb; AltName: Full=Cytochrome c oxidase subunit VIA*; Flags: Precursor && PF01215:Cytochrome c oxidase subunit Vb	-
ENSMUSG00000032643	73.5013	54.8841	42.0266	30.3936	6.4449	23.3879	56.804	20.0755	1.48922	0.000939305	0.00514614	Fhl3	4	124594494	124602404	+	1683	protein_coding	- && Q9R059.2 RecName: Full=Four and a half LIM domains protein 3; Short=FHL-3; AltName: Full=Skeletal muscle LIM-protein 2; Short=SLIM-2 && PF00412:LIM domain	LIM
ENSMUSG00000029373	130.893	58.7356	25.5814	23.745	24.7055	28.7034	71.7366	25.7179	1.4776	0.00133961	0.0069041	Pf4	5	90920294	90921242	+	721	protein_coding	- && Q9Z126.1 RecName: Full=Platelet factor 4; Short=PF-4; AltName: Full=C-X-C motif chemokine 4; Flags: Precursor && PF00048:Small cytokines (intecrine/chemokine), interleukin-8 like	-
ENSMUSG00000050896	33.2266	32.7379	25.5814	6.6486	12.8898	13.8202	30.5153	11.1195	1.46477	0.00434605	1	Rtn4rl2	2	84702268	84717054	-	1506	protein_coding	- && Q7M6Z0.1 RecName: Full=Reticulon-4 receptor-like 2; AltName: Full=Nogo receptor-like 3; AltName: Full=Nogo-66 receptor homolog 1; AltName: Full=Nogo-66 receptor-related protein 2; Short=NgR2; Flags: Precursor && PF13855:Leucine rich repeat	-
ENSMUSG00000103755	18.1236	23.1091	16.4452	1.8996	13.964	5.31544	19.226	7.05967	1.46157	0.0351953	1	Gm37805	9	95289514	95290607	+	1094	TEC	- && - && -	-
ENSMUSG00000065126	8.05494	21.1833	18.2724	7.5984	7.51905	2.12618	15.8369	5.74788	1.45862	0.0490581	1	Snord104	11	106391819	106391888	+	70	snoRNA	- && - && -	-
ENSMUSG00000095526	41.2816	29.8493	24.6678	10.4478	12.8898	11.694	31.9329	11.6772	1.45156	0.00357423	0.0153003	Gm10243	6	48500452	48500784	+	333	processed_pseudogene	- && P04646.1 RecName: Full=60S ribosomal protein L35a >O55142.2 RecName: Full=60S ribosomal protein L35a && PF01247:Ribosomal protein L35Ae	-
ENSMUSG00000024043	55.3777	105.917	60.299	37.992	19.3347	23.3879	73.8645	26.9049	1.44939	0.000122858	0.000944354	Arhgap28	17	68149708	68311115	-	5377	protein_coding	- && Q8BN58.1 RecName: Full=Rho GTPase-activating protein 28; AltName: Full=Rho-type GTPase-activating protein 28 && -	-
ENSMUSG00000046223	13.0893	13.4803	15.5316	3.7992	5.37075	6.37853	14.0337	5.18283	1.44449	0.0473005	1	Plaur	7	24161909	24175393	+	2617	protein_coding	- && P35456.1 RecName: Full=Urokinase plasminogen activator surface receptor; Short=U-PAR; Short=uPAR; AltName: CD_antigen=CD87; Flags: Precursor && PF00021:u-PAR/Ly-6 domain	-
ENSMUSG00000001025	698.766	764.526	662.376	270.693	193.347	318.927	708.556	260.989	1.44005	2.00154e-21	1.3124e-18	S100a6	3	90520189	90531488	+	1367	protein_coding	- && P14069.3 RecName: Full=Protein S100-A6; AltName: Full=5B10; AltName: Full=Calcyclin; AltName: Full=Prolactin receptor-associated protein; AltName: Full=S100 calcium-binding protein A6 && -	-
ENSMUSG00000091223	15.103	12.5174	25.5814	3.7992	3.22245	12.7571	17.7339	6.5929	1.43759	0.04377	1	Gm8775	3	4276778	4278104	+	1327	processed_pseudogene	- && - && -	-
ENSMUSG00000098893	41.2816	37.5523	30.1495	10.4478	23.6313	6.37853	36.3278	13.4859	1.43424	0.00462114	0.0187949	Gm17828	9	72199824	72200622	-	799	processed_pseudogene	- && P12970.2 RecName: Full=60S ribosomal protein L7a; AltName: Full=Surfeit locus protein 3 && PF01248:Ribosomal protein L7Ae/L30e/S12e/Gadd45 family	-
ENSMUSG00000014294	919.27	1162.2	1204.15	361.874	411.4	448.623	1095.21	407.299	1.4288	2.99597e-30	5.64778e-27	Ndufa2	18	36875385	36877610	-	572	protein_coding	- && - && PF05047:Mitochondrial ribosomal protein L51 / S25 / CI-B8 domain	-
ENSMUSG00000026407	17.1167	8.66591	42.0266	12.3474	4.2966	8.50471	22.6031	8.3829	1.42578	0.0364543	1	Cacna1s	1	135980488	136047560	+	6550	protein_coding	- && Q02789.2 RecName: Full=Voltage-dependent L-type calcium channel subunit alpha-1S; AltName: Full=Calcium channel, L type, alpha-1 polypeptide, isoform 3, skeletal muscle; AltName: Full=Voltage-gated calcium channel subunit alpha Cav1.1 && PF08763:Voltage gated calcium channel IQ domain|PF16905:Voltage-dependent L-type calcium channel, IQ-associated|PF00520:Ion transport protein	Ion_trans
ENSMUSG00000050299	80.5494	103.991	83.1396	24.6948	31.1504	44.6497	89.2266	33.4983	1.4187	6.46522e-06	7.99197e-05	Gm9843	16	76200139	76200540	-	402	processed_pseudogene	- && P35545.1 RecName: Full=Ubiquitin-like protein FUBI; AltName: Full=Monoclonal non-specific suppressor factor beta; Short=MNSF-beta >P62868.1 RecName: Full=Ubiquitin-like protein FUBI && PF00240:Ubiquitin family|PF04758:Ribosomal protein S30	Ribosomal_S30
ENSMUSG00000099471	12.0824	26.9606	14.6179	10.4478	4.2966	5.31544	17.887	6.68661	1.40744	0.0397728	1	Gm8451	1	127210399	127210845	-	447	processed_pseudogene	- && P14115.5 RecName: Full=60S ribosomal protein L27a; AltName: Full=L29 && PF00828:Ribosomal protein L18e/L15	-
ENSMUSG00000043068	30.206	68.3644	37.4585	14.247	19.3347	18.0725	45.343	17.2181	1.40107	0.00178223	0.00872655	Fam89a	8	125466996	125478571	-	1338	protein_coding	- && Q14BJ1.2 RecName: Full=Protein FAM89A && -	-
ENSMUSG00000004885	36.2472	40.4409	36.5449	15.1968	5.37075	22.3249	37.7443	14.2975	1.39812	0.00429372	0.0177602	Crabp2	3	87855973	87860683	+	1322	protein_coding	- && P22935.2 RecName: Full=Cellular retinoic acid-binding protein 2; AltName: Full=Cellular retinoic acid-binding protein II; Short=CRABP-II && PF00061:Lipocalin / cytosolic fatty-acid binding protein family	-
ENSMUSG00000069919	4197.63	3276.68	3727.58	1562.42	1315.83	1387.33	3733.96	1421.86	1.39225	4.66952e-46	3.52105e-42	Hba-a1	11	32233511	32234465	+	812	protein_coding	- && P01942.2 RecName: Full=Hemoglobin subunit alpha; AltName: Full=Alpha-globin; AltName: Full=Hemoglobin alpha chain && PF00042:Globin	-
ENSMUSG00000059901	25.1717	12.5174	15.5316	9.49799	4.2966	6.37853	17.7402	6.72438	1.3874	0.0387383	1	Adamts14	10	61032891	61109217	-	5197	protein_coding	- && Q8WXS8.2 RecName: Full=A disintegrin and metalloproteinase with thrombospondin motifs 14; Short=ADAM-TS 14; Short=ADAM-TS14; Short=ADAMTS-14; Flags: Precursor && PF01562:Reprolysin family propeptide|PF01421:Reprolysin (M12B) family zinc metalloprotease|PF00090:Thrombospondin type 1 domain|PF05986:ADAM-TS Spacer 1	TSP_1
ENSMUSG00000050212	87.5974	52.9584	56.6445	18.996	23.6313	32.9557	65.7334	25.1943	1.38644	0.000178388	0.00130406	Eva1b	4	126041537	126043668	+	1942	protein_coding	- && - && -	-
ENSMUSG00000029454	53.364	42.3667	46.5947	17.0964	17.1864	20.1987	47.4418	18.1605	1.38592	0.000507878	0.00309717	Mapkapk5	5	121663101	121683968	-	3195	protein_coding	- && O54992.1 RecName: Full=MAP kinase-activated protein kinase 5; Short=MAPK-activated protein kinase 5; Short=MAPKAP kinase 5; Short=MAPKAPK-5 && PF00069:Protein kinase domain	Pkinase
ENSMUSG00000101320	19.1305	21.1833	21.0133	9.49799	9.66736	4.25235	20.4424	7.8059	1.38493	0.0234566	1	Gm28529	18	6490143	6496962	+	977	lncRNA	- && - && -	-
ENSMUSG00000025150	27.1854	31.775	29.2359	10.4478	11.8157	11.694	29.3988	11.3191	1.37922	0.00573503	1	Cbr2	11	120620315	120622940	-	1327	protein_coding	- && P08074.1 RecName: Full=Carbonyl reductase [NADPH] 2; AltName: Full=Adipocyte protein P27; Short=AP27; AltName: Full=Lung carbonyl reductase; Short=LCR; AltName: Full=NADPH-dependent carbonyl reductase 2 && PF00106:short chain dehydrogenase	adh_short
ENSMUSG00000050856	606.134	738.528	759.219	330.53	294.317	187.104	701.294	270.65	1.37192	1.77574e-16	5.57914e-14	Atp5k	5	108581110	108582314	-	616	protein_coding	- && - && -	-
ENSMUSG00000025739	68.467	108.805	154.402	45.5904	40.8177	42.5235	110.558	42.9772	1.36459	1.26687e-05	0.000141523	Gng13	17	25936145	25938380	+	773	protein_coding	- && Q9JMF3.1 RecName: Full=Guanine nucleotide-binding protein G(I)/G(S)/G(O) subunit gamma-13; Flags: Precursor && PF00631:GGL domain	-
ENSMUSG00000079523	1661.33	2138.55	1947.84	902.309	749.757	592.14	1915.91	748.069	1.35572	9.13838e-26	1.25287e-22	Tmsb10	6	72934330	72935731	-	1276	protein_coding	- && Q6ZWY8.3 RecName: Full=Thymosin beta-10 >P63312.2 RecName: Full=Thymosin beta-10 >P63313.2 RecName: Full=Thymosin beta-10 >P63314.2 RecName: Full=Thymosin beta-10 && -	-
ENSMUSG00000036832	15.103	51.0326	50.2492	8.5482	19.3347	18.0725	38.7949	15.3185	1.35115	0.0101584	0.0356275	Lpar3	3	145926718	145991941	+	2464	protein_coding	- && Q9EQ31.1 RecName: Full=Lysophosphatidic acid receptor 3; Short=LPA receptor 3; Short=LPA-3; AltName: Full=Lysophosphatidic acid receptor Edg-7 && PF00001:7 transmembrane receptor (rhodopsin family)	7tm_1
ENSMUSG00000026271	11.0755	46.2182	27.4086	5.6988	18.2606	9.5678	28.2341	11.1757	1.34798	0.0278195	1	Gpr35	1	92878587	92914113	+	4839	protein_coding	- && Q9ES90.1 RecName: Full=G-protein coupled receptor 35; AltName: Full=Kynurenic acid receptor; Short=KYNA receptor && -	-
ENSMUSG00000024309	422.884	463.145	581.977	227.002	190.125	161.589	489.335	192.905	1.34137	3.00869e-16	8.72579e-14	Pfdn6	17	34157795	34159317	-	1193	protein_coding	- && Q03958.1 RecName: Full=Prefoldin subunit 6; AltName: Full=Protein Ke2 && PF01920:Prefoldin subunit	-
ENSMUSG00000032593	28.1923	103.991	73.0897	21.8454	32.2245	27.6403	68.4243	27.2367	1.33381	0.00159891	0.00797391	Amigo3	9	107930358	107932900	+	2543	protein_coding	- && Q8C2S7.1 RecName: Full=Amphoterin-induced protein 3; AltName: Full=AMIGO-3; AltName: Full=Alivin-3; Flags: Precursor && PF13855:Leucine rich repeat	-
ENSMUSG00000058603	137.941	132.877	152.575	58.8876	68.7456	40.3974	141.131	56.0102	1.33312	9.32155e-08	2.12354e-06	Rpl28-ps1	1	127966306	127966719	+	414	processed_pseudogene	- && P41105.2 RecName: Full=60S ribosomal protein L28 && PF01778:Ribosomal L28e protein family	-
ENSMUSG00000041482	152.037	466.996	310.631	144.37	97.7477	128.634	309.888	123.584	1.32598	0.00574081	0.0224817	Piezo2	18	63143284	63520254	-	17162	protein_coding	- && - && PF15917:Piezo|PF12166:Piezo non-specific cation channel, R-Ras-binding domain	-
ENSMUSG00000096935	26.1785	22.1462	10.0498	12.3474	5.37075	5.31544	19.4582	7.67786	1.32542	0.0454033	1	1700113A16Rik	3	88078863	88085092	-	1095	lncRNA	- && - && -	-
ENSMUSG00000118642	329.246	332.193	296.927	117.775	104.193	162.653	319.455	128.207	1.31785	3.54346e-13	4.38024e-11	AY036118	17	40158994	40159718	-	714	pseudogene	- && - && -	-
ENSMUSG00000032860	207.415	98.2137	118.771	52.239	35.447	82.9209	141.466	56.8689	1.31389	4.15407e-05	0.000383166	P2ry2	7	100645775	100662073	-	3927	protein_coding	- && - && PF00001:7 transmembrane receptor (rhodopsin family)	7tm_1
ENSMUSG00000060438	58.3983	54.8841	71.2625	29.4438	23.6313	21.2618	61.515	24.779	1.30867	0.000210617	0.00149474	Rps10-ps1	3	95529589	95530083	+	495	processed_pseudogene	- && - && PF03501:Plectin/S10 domain	-
ENSMUSG00000093674	3514.97	4589.08	4623.84	1622.26	2106.41	1416.03	4242.63	1714.9	1.30695	7.73636e-10	3.33349e-08	Rpl41	10	128383983	128385174	-	1168	protein_coding	- && - && -	-
ENSMUSG00000023064	1303.89	2224.25	1888.46	880.464	699.272	611.276	1805.53	730.337	1.30556	8.05615e-07	1.35748e-05	Sncg	14	34092231	34096746	-	852	protein_coding	- && - && PF01387:Synuclein	-
ENSMUSG00000080848	41.2816	50.0697	47.5083	15.1968	25.7796	15.9463	46.2865	18.9742	1.29215	0.00153395	0.00770604	Gm9385	9	115869661	115870132	-	472	processed_pseudogene	- && P83732.1 RecName: Full=60S ribosomal protein L24; AltName: Full=L30 >Q862I1.2 RecName: Full=60S ribosomal protein L24; AltName: Full=Ribosomal protein L30 >Q8BP67.2 RecName: Full=60S ribosomal protein L24 >P83731.1 RecName: Full=60S ribosomal protein L24; AltName: Full=60S ribosomal protein L30 >P61122.1 RecName: Full=60S ribosomal protein L24 >Q66WF5.1 RecName: Full=60S ribosomal protein L2…	-
ENSMUSG00000002083	98.673	91.4735	88.6213	49.3896	25.7796	38.2712	92.9226	37.8135	1.29007	1.87915e-05	0.000198734	Bbc3	7	16042318	16052130	+	2124	protein_coding	- && - && -	-
ENSMUSG00000098720	16.1099	20.2205	16.4452	5.6988	6.4449	9.5678	17.5918	7.23717	1.28605	0.0444684	1	Gm27239	18	81030671	81031790	+	642	lncRNA	- && - && -	-
ENSMUSG00000020562	24.1648	20.2205	13.7043	3.7992	9.66736	10.6309	19.3632	8.03248	1.27838	0.0447849	1	Efcab10	12	33444853	33451266	+	673	protein_coding	- && Q9D581.1 RecName: Full=EF-hand calcium-binding domain-containing protein 10 && -	-
ENSMUSG00000040610	126.865	214.722	159.884	70.2852	50.4851	86.1102	167.157	68.9601	1.27725	7.05474e-07	1.20626e-05	Tlx3	11	33150752	33153589	-	1533	protein_coding	- && O55144.2 RecName: Full=T-cell leukemia homeobox protein 3; AltName: Full=Homeobox TLX-3; AltName: Full=Homeobox protein Hox-11L2; AltName: Full=Respiratory neuron homeobox protein && PF00046:Homeobox domain	Homeobox
ENSMUSG00000034664	179.222	98.2137	67.608	41.7912	33.2987	68.0377	115.015	47.7092	1.26835	0.00030459	0.00202358	Itga2b	11	102344123	102360948	-	5454	protein_coding	- && Q9QUM0.2 RecName: Full=Integrin alpha-IIb; AltName: Full=GPalpha IIb; Short=GPIIb; AltName: Full=Platelet membrane glycoprotein IIb; AltName: CD_antigen=CD41; Contains: RecName: Full=Integrin alpha-IIb heavy chain; Contains: RecName: Full=Integrin alpha-IIb light chain; Flags: Precursor && PF01839:FG-GAP repeat|PF08441:Integrin alpha	FG-GAP
ENSMUSG00000020155	25.1717	84.7334	53.9037	22.7952	17.1864	28.7034	54.6029	22.895	1.25522	0.00473355	0.0191437	Kcnmb1	11	33913013	33923641	+	4191	protein_coding	- && Q8CAE3.3 RecName: Full=Calcium-activated potassium channel subunit beta-1; AltName: Full=BK channel subunit beta-1; Short=BKbeta; Short=BKbeta1; AltName: Full=Calcium-activated potassium channel, subfamily M subunit beta-1; Short=Calcium-activated potassium channel subunit beta; AltName: Full=Charybdotoxin receptor subunit beta-1; AltName: Full=K(VCA)beta-1; AltName: Full=Maxi K channel subu…	-
ENSMUSG00000020163	725.951	864.666	1036.96	338.129	379.175	384.838	875.859	367.381	1.25508	6.71224e-21	4.2178e-18	Uqcr11	10	80238831	80242664	-	641	protein_coding	- && Q9CPX8.1 RecName: Full=Cytochrome b-c1 complex subunit 10; AltName: Full=Complex III subunit 10; AltName: Full=Complex III subunit XI; AltName: Full=Ubiquinol-cytochrome c reductase complex 6.4 kDa protein && -	-
ENSMUSG00000021040	23.1579	24.072	29.2359	17.0964	9.66736	5.31544	25.4886	10.6931	1.24204	0.026384	1	Slirp	12	87490666	87498976	+	3104	protein_coding	- && Q9D8T7.2 RecName: Full=SRA stem-loop-interacting RNA-binding protein, mitochondrial; Flags: Precursor && -	-
ENSMUSG00000035273	49.3365	17.3318	16.4452	9.49799	9.66736	15.9463	27.7045	11.7039	1.24179	0.0329167	1	Hpse	5	100827350	100867582	-	3516	protein_coding	- && Q6YGZ1.3 RecName: Full=Heparanase; AltName: Full=Endo-glucoronidase; Contains: RecName: Full=Heparanase 8 kDa subunit; Contains: RecName: Full=Heparanase 50 kDa subunit; Flags: Precursor && PF03662:Glycosyl hydrolase family 79, N-terminal domain	-
ENSMUSG00000071052	106.728	132.877	123.339	53.1888	55.8558	44.6497	120.981	51.2314	1.23967	9.58537e-07	1.56278e-05	Rpl7a-ps5	17	58145425	58146216	-	792	processed_pseudogene	- && P12970.2 RecName: Full=60S ribosomal protein L7a; AltName: Full=Surfeit locus protein 3 && PF01248:Ribosomal protein L7Ae/L30e/S12e/Gadd45 family	-
ENSMUSG00000040950	35.2404	26.9606	36.5449	17.0964	11.8157	12.7571	32.9153	13.8897	1.23967	0.0085109	0.0309358	Mgl2	11	70021155	70028376	+	2094	protein_coding	- && P49300.1 RecName: Full=C-type lectin domain family 10 member A; AltName: Full=MMGL; AltName: Full=Macrophage asialoglycoprotein-binding protein 1; Short=M-ASGP-BP-1; AltName: Full=Macrophage galactose/N-acetylgalactosamine-specific lectin && PF03954:Hepatic lectin, N-terminal domain|PF00059:Lectin C-type domain	Lectin_C
ENSMUSG00000069917	397.713	260.94	254.9	105.428	95.5994	187.104	304.518	129.377	1.23565	1.6564e-07	3.47429e-06	Hba-a2	11	32246489	32247298	+	667	protein_coding	- && P01942.2 RecName: Full=Hemoglobin subunit alpha; AltName: Full=Alpha-globin; AltName: Full=Hemoglobin alpha chain && PF00042:Globin	-
ENSMUSG00000038451	74.5082	61.6243	53.9037	18.996	32.2245	29.7665	63.3454	26.9957	1.23542	0.000490706	0.0030144	Spsb2	6	124785624	124787582	+	1658	protein_coding	- && O88838.1 RecName: Full=SPRY domain-containing SOCS box protein 2; Short=SSB-2; AltName: Full=Gene-rich cluster protein C9 && PF07525:SOCS box|PF00622:SPRY domain	SPRY
ENSMUSG00000044951	23.1579	11.5546	83.1396	17.0964	13.964	19.1356	39.284	16.732	1.23475	0.0355043	0.0942678	Mylk4	13	32884810	32967937	-	7696	protein_coding	- && - && -	-
ENSMUSG00000086096	52.3571	32.7379	50.2492	30.3936	13.964	12.7571	45.1147	19.0382	1.23334	0.0055235	0.0218031	Gm12688	4	99541844	99543220	-	701	lncRNA	- && - && -	-
ENSMUSG00000024497	16.1099	38.5152	12.7907	9.49799	10.7415	8.50471	22.4719	9.5814	1.22938	0.045049	1	Pou4f3	18	42527604	42530314	+	2399	protein_coding	- && Q63955.2 RecName: Full=POU domain, class 4, transcription factor 3; AltName: Full=Brain-specific homeobox/POU domain protein 3C; Short=Brain-3C; Short=Brn-3C; AltName: Full=Brn-3.1 && PF00157:Pou domain - N-terminal to homeobox domain|PF00046:Homeobox domain	Pou
ENSMUSG00000040564	45.309	57.7728	54.8173	23.745	27.9279	15.9463	52.633	22.5397	1.22366	0.00130816	0.00676555	Apoc1	7	19423406	19426585	-	744	protein_coding	- && P34928.1 RecName: Full=Apolipoprotein C-I; Short=Apo-CI; Short=ApoC-I; AltName: Full=Apolipoprotein C1; Contains: RecName: Full=Truncated apolipoprotein C-I; Flags: Precursor && -	-
ENSMUSG00000046491	37.2541	43.3296	39.2857	15.1968	16.1123	20.1987	39.9565	17.1692	1.22125	0.00381695	0.0161604	C1qtnf2	11	43365103	43382352	+	1308	protein_coding	- && - && PF01391:Collagen triple helix repeat (20 copies)|PF00386:C1q domain	Collagen
ENSMUSG00000073940	730.986	536.324	587.459	243.149	199.792	355.072	618.256	266.004	1.21692	5.22256e-12	4.71625e-10	Hbb-bt	7	103461731	103463203	-	703	protein_coding	- && P02088.2 RecName: Full=Hemoglobin subunit beta-1; AltName: Full=Beta-1-globin; AltName: Full=Hemoglobin beta-1 chain; AltName: Full=Hemoglobin beta-major chain && PF00042:Globin	-
ENSMUSG00000043155	16.1099	35.6265	14.6179	11.3976	9.66736	7.44162	22.1181	9.50219	1.21453	0.0443583	1	Hpdl	4	116677101	116678904	-	1804	protein_coding	- && Q8K248.1 RecName: Full=4-hydroxyphenylpyruvate dioxygenase-like protein; AltName: Full=Glyoxalase domain-containing protein 1 && -	-
ENSMUSG00000091955	32.2198	26.9606	19.1861	12.3474	10.7415	10.6309	26.1221	11.2399	1.21192	0.0214728	1	Gm9844	7	24561638	24562122	+	485	protein_coding	- && Q6ZWY8.3 RecName: Full=Thymosin beta-10 >P63312.2 RecName: Full=Thymosin beta-10 >P63313.2 RecName: Full=Thymosin beta-10 >P63314.2 RecName: Full=Thymosin beta-10 && -	-
ENSMUSG00000091957	64.4395	55.847	80.3987	27.5442	36.5211	23.3879	66.8951	29.1511	1.20105	0.00045608	0.00284927	Rps2-ps10	18	61392079	61393043	-	965	transcribed_processed_pseudogene	- && P27952.1 RecName: Full=40S ribosomal protein S2 >P25444.3 RecName: Full=40S ribosomal protein S2; AltName: Full=40S ribosomal protein S4; AltName: Full=Protein LLRep3 && PF03719:Ribosomal protein S5, C-terminal domain|PF00333:Ribosomal protein S5, N-terminal domain	-
ENSMUSG00000022842	59.4052	43.3296	63.0399	31.3434	21.483	19.1356	55.2582	23.9873	1.19797	0.00148043	0.00748014	Ece2	16	20448578	20465235	+	5110	protein_coding	- && Q80Z60.2 RecName: Full=Endothelin-converting enzyme 2; Short=ECE-2; Includes: RecName: Full=Methyltransferase-like region; Includes: RecName: Full=Endothelin-converting enzyme 2 region && PF01431:Peptidase family M13|PF05649:Peptidase family M13	-
ENSMUSG00000060639	30.206	23.1091	21.9269	11.3976	9.66736	11.694	25.0807	10.9196	1.19678	0.0238472	1	H4c9	13	22224806	22225532	-	727	protein_coding	- && - && PF15511:Centromere kinetochore component CENP-T histone fold	-
ENSMUSG00000067847	311.122	372.634	461.379	161.466	152.529	187.104	381.712	167.033	1.19388	4.92905e-12	4.53262e-10	Romo1	2	155985959	155987717	+	747	protein_coding	- && P60602.1 RecName: Full=Reactive oxygen species modulator 1; Short=ROS modulator 1; AltName: Full=Epididymis tissue protein Li 175; AltName: Full=Glyrichin; AltName: Full=Mitochondrial targeting GxxxG motif protein; Short=MTGM; AltName: Full=Protein MGR2 homolog >P60603.1 RecName: Full=Reactive oxygen species modulator 1; Short=ROS modulator 1; AltName: Full=Protein MGR2 homolog >Q3SZV8.1 Rec…	-
ENSMUSG00000052305	5877.08	4934.76	4302.24	2085.76	2040.89	2481.25	5038.03	2202.63	1.19359	1.62728e-29	2.72678e-26	Hbb-bs	7	103475741	103477303	-	768	protein_coding	- && P02088.2 RecName: Full=Hemoglobin subunit beta-1; AltName: Full=Beta-1-globin; AltName: Full=Hemoglobin beta-1 chain; AltName: Full=Hemoglobin beta-major chain && PF00042:Globin	-
ENSMUSG00000030717	125.858	125.174	114.203	75.0342	30.0762	54.2175	121.745	53.1093	1.18942	3.98583e-05	0.00036991	Nupr1	7	126222421	126230033	-	2514	protein_coding	- && Q9WTK0.1 RecName: Full=Nuclear protein 1; AltName: Full=Nuclear transcriptional regulator protein 1; AltName: Full=Protein p8 && -	-
ENSMUSG00000020219	594.052	720.234	740.033	309.635	276.057	315.737	684.773	300.476	1.18846	2.19241e-20	1.18085e-17	Timm13	10	80735284	80736803	-	1371	protein_coding	- && - && -	-
ENSMUSG00000019278	30.206	27.9235	40.1993	12.3474	4.2966	26.5772	32.7763	14.4071	1.18825	0.0290426	0.0806169	Dpep1	8	123912981	123928551	+	2486	protein_coding	- && P31428.2 RecName: Full=Dipeptidase 1; AltName: Full=Membrane-bound dipeptidase 1; Short=MBD-1; AltName: Full=Microsomal dipeptidase; AltName: Full=Renal dipeptidase; Flags: Precursor && PF01244:Membrane dipeptidase (Peptidase family M19)	-
ENSMUSG00000015092	1136.75	1230.56	1340.28	622.119	529.556	474.137	1235.87	541.937	1.18813	1.68978e-25	1.82025e-22	Edf1	2	25447859	25452094	+	1317	protein_coding	- && P69736.1 RecName: Full=Endothelial differentiation-related factor 1; Short=EDF-1; AltName: Full=Calmodulin-associated peptide 19; Short=CAP-19; AltName: Full=Multiprotein-bridging factor 1; Short=MBF1 >Q9JMG1.1 RecName: Full=Endothelial differentiation-related factor 1; Short=EDF-1; AltName: Full=Multiprotein-bridging factor 1; Short=MBF1 && PF08523:Multiprotein bridging factor 1|PF01381:Hel…	HTH_3
ENSMUSG00000082585	83.57	84.7334	99.5847	55.0884	40.8177	21.2618	89.296	39.056	1.18697	0.000277499	0.00187246	Gm15387	15	73965535	73966182	-	648	processed_pseudogene	- && - && PF09011:HMG-box domain|PF00505:HMG (high mobility group) box	HMG_box
ENSMUSG00000043099	116.797	66.4387	95.9303	33.243	41.8919	47.839	93.0552	40.9913	1.18537	0.000117067	0.000909108	Hic1	11	75055391	75060345	-	3765	protein_coding	- && Q9R1Y5.4 RecName: Full=Hypermethylated in cancer 1 protein; Short=Hic-1 && PF00651:BTB/POZ domain	BTB
ENSMUSG00000086841	180.229	230.128	219.269	112.076	90.2287	74.4162	209.876	92.2404	1.18303	1.63419e-08	4.82295e-07	2410006H16Rik	11	62493703	62495633	+	462	lncRNA	- && - && -	-
ENSMUSG00000074218	22.1511	24.072	51.1628	13.2972	19.3347	10.6309	32.462	14.4209	1.17628	0.0221105	0.0653844	Cox7a1	7	29883569	29885503	+	535	protein_coding	- && - && -	-
ENSMUSG00000040631	152.037	474.7	287.791	144.37	120.305	143.517	304.842	136.064	1.16379	0.0129331	0.0429236	Dok4	8	95590456	95602958	-	3054	protein_coding	- && Q99KE3.1 RecName: Full=Docking protein 4; AltName: Full=Downstream of tyrosine kinase 4 && PF02174:PTB domain (IRS-1 type)	-
ENSMUSG00000028998	302.06	350.488	592.027	193.759	196.57	165.842	414.858	185.39	1.163	2.07215e-08	5.84114e-07	Tomm7	5	24043942	24049159	-	1125	protein_coding	- && Q9D173.1 RecName: Full=Mitochondrial import receptor subunit TOM7 homolog; AltName: Full=Translocase of outer membrane 7 kDa subunit homolog && -	-
ENSMUSG00000042485	42.2884	36.5894	41.113	26.5944	16.1123	10.6309	39.9969	17.7792	1.1598	0.00898708	0.0323162	Mustn1	14	30601157	30603567	+	1236	protein_coding	- && Q99JI1.1 RecName: Full=Musculoskeletal embryonic nuclear protein 1 && -	-
ENSMUSG00000022831	73.5013	59.6985	60.299	36.0924	17.1864	32.9557	64.4996	28.7448	1.1596	0.00111678	0.00591994	Hcls1	16	36755345	36783574	+	2525	protein_coding	- && P49710.2 RecName: Full=Hematopoietic lineage cell-specific protein; AltName: Full=Hematopoietic cell-specific LYN substrate 1; AltName: Full=LckBP1 && PF00018:SH3 domain|PF02218:Repeat in HS1/Cortactin	SH3_1
ENSMUSG00000057322	1407.6	1620.53	1484.63	644.914	715.384	667.62	1504.25	675.973	1.15473	5.26106e-34	1.13346e-30	Rpl38	11	114559350	114563157	+	542	protein_coding	- && - && PF01781:Ribosomal L38e protein family	-
ENSMUSG00000002233	257.758	269.606	238.455	143.42	102.044	97.8041	255.273	114.423	1.15297	1.42717e-09	5.59042e-08	Rhoc	3	104695691	104701775	+	1618	protein_coding	- && - && PF00071:Ras family	Ras
ENSMUSG00000103034	25.1717	29.8493	19.1861	17.0964	7.51905	8.50471	24.7357	11.0401	1.15115	0.0382031	1	Gm8797	3	5815866	5816355	+	490	protein_coding	- && P0CG62.1 RecName: Full=Polyubiquitin-B; Contains: RecName: Full=Ubiquitin; Flags: Precursor >P0CG49.1 RecName: Full=Polyubiquitin-B; Contains: RecName: Full=Ubiquitin; Flags: Precursor >P0CG51.1 RecName: Full=Polyubiquitin-B; Contains: RecName: Full=Ubiquitin; Flags: Precursor && -	-
ENSMUSG00000104960	113.776	131.914	144.352	73.1346	50.4851	52.0913	130.014	58.5703	1.14656	4.90078e-06	6.3062e-05	Snhg8	3	123301201	123302053	-	853	lncRNA	- && - && -	-
ENSMUSG00000059479	27.1854	30.8121	29.2359	6.6486	19.3347	13.8202	29.0778	13.2678	1.14305	0.025978	0.0740091	B3gnt8	7	25326079	25334525	+	6474	protein_coding	- && - && -	-
ENSMUSG00000095304	302.06	396.706	376.412	108.277	224.497	159.463	358.393	164.079	1.13138	5.69084e-08	1.38746e-06	Plac9a	14	25887930	25903524	-	1751	protein_coding	- && Q8K262.1 RecName: Full=Placenta-specific protein 9; Flags: Precursor && PF15205:Placenta-specific protein 9	-
ENSMUSG00000046337	656.477	386.115	412.957	299.187	128.898	236.006	485.183	221.364	1.13113	0.00579444	0.022633	Fam178b	1	36601773	36722264	-	3190	protein_coding	- && - && -	-
ENSMUSG00000047963	98.673	189.687	141.611	56.0382	59.0783	81.8578	143.324	65.6581	1.12911	3.39186e-05	0.000325605	Stbd1	5	92750900	92754438	+	2221	protein_coding	- && - && PF00686:Starch binding domain	-
ENSMUSG00000028148	75.515	32.7379	45.6811	28.494	17.1864	24.451	51.3113	23.3771	1.12784	0.00677024	0.0255702	Them5	3	94249406	94254659	+	1540	protein_coding	- && Q9CQJ0.1 RecName: Full=Acyl-coenzyme A thioesterase THEM5; Short=Acyl-CoA thioesterase THEM5; AltName: Full=Acyl-coenzyme A thioesterase 15; AltName: Full=Thioesterase superfamily member 5 && -	-
ENSMUSG00000043243	24.1648	40.4409	16.4452	10.4478	15.0381	11.694	27.017	12.3933	1.12628	0.0368162	1	Niban3	8	72050292	72060580	+	3560	protein_coding	- && - && -	-
ENSMUSG00000036887	446.042	558.47	638.621	239.349	280.353	233.879	547.711	251.194	1.12627	8.97284e-14	1.25296e-11	C1qa	4	136623228	136626114	-	1040	protein_coding	- && P98086.2 RecName: Full=Complement C1q subcomponent subunit A; Flags: Precursor && PF01391:Collagen triple helix repeat (20 copies)|PF00386:C1q domain	Collagen
ENSMUSG00000020812	28.1923	24.072	22.8405	17.0964	4.2966	12.7571	25.0349	11.3834	1.12548	0.0455146	1	Snhg16	11	116562430	116575898	+	3353	lncRNA	- && - && -	-
ENSMUSG00000070343	66.4532	68.3644	47.5083	22.7952	32.2245	28.7034	60.7753	27.9077	1.12527	0.00136921	0.00702112	Gm10288	3	146544566	146545102	-	537	processed_pseudogene	- && Q6QMZ8.3 RecName: Full=60S ribosomal protein L11 >P62914.2 RecName: Full=60S ribosomal protein L11 >P62913.2 RecName: Full=60S ribosomal protein L11; AltName: Full=CLL-associated antigen KW-12 >Q9CXW4.4 RecName: Full=60S ribosomal protein L11 >Q3T087.3 RecName: Full=60S ribosomal protein L11 && PF00281:Ribosomal protein L5|PF00673:ribosomal L5P family C-terminus	-
ENSMUSG00000078480	28.1923	25.0349	21.0133	9.49799	13.964	10.6309	24.7468	11.3643	1.12523	0.0333365	1	Mrpl48-ps	4	88517412	88518047	-	636	processed_pseudogene	- && - && PF00338:Ribosomal protein S10p/S20e	Ribosomal_S10
ENSMUSG00000053113	78.5356	53.9212	57.5582	28.494	26.8538	31.8927	63.3383	29.0801	1.12177	0.00103302	0.0055679	Socs3	11	117856905	117860873	-	2891	protein_coding	- && O35718.1 RecName: Full=Suppressor of cytokine signaling 3; Short=SOCS-3; AltName: Full=Cytokine-inducible SH2 protein 3; Short=CIS-3; AltName: Full=Protein EF-10 && -	-
ENSMUSG00000021773	36.2472	77.0303	69.4352	23.745	29.0021	31.8927	60.9043	28.2132	1.1151	0.0030374	0.0134069	Comtd1	14	21895923	21899045	-	2470	protein_coding	- && Q8BIG7.1 RecName: Full=Catechol O-methyltransferase domain-containing protein 1 && PF01596:O-methyltransferase	-
ENSMUSG00000050328	387.644	249.386	260.382	141.52	120.305	152.022	299.137	137.949	1.11496	1.40641e-08	4.25051e-07	Hoxc12	15	102845192	102847044	+	1031	protein_coding	- && Q8K5B8.1 RecName: Full=Homeobox protein Hox-C12; AltName: Full=Homeobox protein Hox-3.8 && PF00046:Homeobox domain	Homeobox
ENSMUSG00000000126	63.4326	56.8099	31.9768	27.5442	13.964	28.7034	50.7398	23.4038	1.11022	0.0076565	0.0283223	Wnt9a	11	59197754	59224378	+	3329	protein_coding	- && Q8R5M2.1 RecName: Full=Protein Wnt-9a; AltName: Full=Protein Wnt-14; Flags: Precursor && PF00110:wnt family	wnt
ENSMUSG00000052629	45.309	44.2924	77.6578	30.3936	32.2245	14.8832	55.7531	25.8338	1.1095	0.00566455	0.0222351	Gm9885	7	78228578	78230786	+	2209	lncRNA	- && - && -	-
ENSMUSG00000096257	44.3022	48.144	44.7675	18.996	18.2606	26.5772	45.7379	21.2779	1.10604	0.00469886	0.0190545	Ccer2	7	28455599	28458393	+	1054	protein_coding	- && - && -	-
ENSMUSG00000034872	35.2404	27.9235	36.5449	13.2972	18.2606	14.8832	33.2362	15.4803	1.10593	0.0154257	0.0494231	Gipc3	10	81171099	81179100	-	3521	protein_coding	- && Q8R5M0.1 RecName: Full=PDZ domain-containing protein GIPC3; AltName: Full=Regulator of G-protein signaling 19-interacting protein 3 && -	-
ENSMUSG00000030674	27.1854	54.8841	42.0266	14.247	11.8157	31.8927	41.3654	19.3184	1.10343	0.0189673	0.0581631	Qprt	7	126706286	126721398	-	2645	protein_coding	- && - && PF02749:Quinolinate phosphoribosyl transferase, N-terminal domain|PF01729:Quinolinate phosphoribosyl transferase, C-terminal domain	-
ENSMUSG00000023046	864.899	555.581	565.532	293.488	186.902	444.371	662.004	308.254	1.10261	0.00740092	0.0275657	Igfbp6	15	102052797	102057946	+	1112	protein_coding	- && P47880.2 RecName: Full=Insulin-like growth factor-binding protein 6; Short=IBP-6; Short=IGF-binding protein 6; Short=IGFBP-6; Flags: Precursor && PF00086:Thyroglobulin type-1 repeat|PF00219:Insulin-like growth factor binding protein	-
ENSMUSG00000020544	140.961	129.989	133.389	80.733	49.4109	57.4068	134.78	62.5169	1.10241	7.81387e-06	9.39721e-05	Cox11	11	90528999	90535757	+	1423	protein_coding	- && Q6P8I6.1 RecName: Full=Cytochrome c oxidase assembly protein COX11, mitochondrial; Flags: Precursor && PF04442:Cytochrome c oxidase assembly protein CtaG/Cox11	-
ENSMUSG00000017817	29.1991	25.0349	72.1761	23.745	10.7415	24.451	42.1367	19.6458	1.1006	0.0262317	0.0745711	Jph2	2	163178162	163239913	-	4255	protein_coding	- && Q9ET78.2 RecName: Full=Junctophilin-2; Short=JP-2; AltName: Full=Junctophilin type 2 && -	-
ENSMUSG00000048373	88.6043	47.1811	68.5216	31.3434	8.59321	55.2806	68.1023	31.7391	1.10014	0.0143403	0.0466393	Fgfbp1	5	44136200	44139121	-	2263	protein_coding	- && O70514.1 RecName: Full=Fibroblast growth factor-binding protein 1; Short=FGF-BP; Short=FGF-BP1; Short=FGF-binding protein 1; Short=FGFBP-1; Flags: Precursor && PF06473:FGF binding protein 1 (FGF-BP1)	-
ENSMUSG00000067288	606.134	670.164	625.831	304.886	319.023	263.646	634.043	295.851	1.09945	6.61339e-19	3.11677e-16	Rps28	17	34038001	34043536	-	1719	protein_coding	- && Q6QAT1.2 RecName: Full=40S ribosomal protein S28 >P62859.1 RecName: Full=40S ribosomal protein S28 >P62857.1 RecName: Full=40S ribosomal protein S28 >P62858.1 RecName: Full=40S ribosomal protein S28 >Q56JX6.1 RecName: Full=40S ribosomal protein S28 && -	-
ENSMUSG00000071497	75.515	98.2137	71.2625	36.0924	40.8177	38.2712	81.6637	38.3938	1.08982	0.000278369	0.00187716	Nutf2-ps1	19	53576599	53577499	-	901	protein_coding	- && - && PF02136:Nuclear transport factor 2 (NTF2) domain	-
ENSMUSG00000024960	512.495	869.48	699.834	336.229	293.243	349.756	693.937	326.409	1.08824	1.61042e-11	1.22044e-09	Plcb3	19	6929693	6953838	-	6960	protein_coding	- && P51432.2 RecName: Full=1-phosphatidylinositol 4,5-bisphosphate phosphodiesterase beta-3; AltName: Full=Phosphoinositide phospholipase C-beta-3; AltName: Full=Phospholipase C-beta-3; Short=PLC-beta-3 && PF09279:Phosphoinositide-specific phospholipase C, efhand-like|PF00388:Phosphatidylinositol-specific phospholipase C, X domain|PF00168:C2 domain|PF00387:Phosphatidylinositol-specific phospholi…	PI-PLC-X
ENSMUSG00000079547	203.387	122.286	116.944	77.8836	51.5592	78.6685	147.539	69.3704	1.08483	5.79603e-05	0.000507607	H2-DMb1	17	34372046	34379204	+	1681	protein_coding	- && P35737.1 RecName: Full=Class II histocompatibility antigen, M beta 1 chain; AltName: Full=H2-M beta 1 chain; Flags: Precursor && PF00969:Class II histocompatibility antigen, beta domain|PF07654:Immunoglobulin C1-set domain	C1-set
ENSMUSG00000050105	61.4189	71.2531	91.3621	34.1928	42.966	28.7034	74.678	35.2874	1.08432	0.000755932	0.00431826	Fam110d	4	133978421	133981417	-	1275	protein_coding	- && - && PF14161:Centrosome-associated N terminus|PF14160:Centrosome-associated C terminus	-
ENSMUSG00000073421	205.401	131.914	157.143	92.1305	61.2266	79.7316	164.819	77.6963	1.08075	6.83862e-06	8.41467e-05	H2-Ab1	17	34476663	34488393	+	2568	protein_coding	- && - && PF07654:Immunoglobulin C1-set domain|PF00969:Class II histocompatibility antigen, beta domain	C1-set
ENSMUSG00000034786	35.2404	42.3667	43.8538	18.0462	18.2606	21.2618	40.487	19.1895	1.0794	0.0085063	0.0309266	Gpsm3	17	34808780	34810728	+	1343	protein_coding	- && Q3U1Z5.2 RecName: Full=G-protein-signaling modulator 3 && PF02188:GoLoco motif	-
ENSMUSG00000068240	436.98	408.261	339.867	244.098	175.087	140.328	395.036	186.504	1.07862	4.9708e-09	1.68082e-07	Gm11808	4	3973092	3973595	-	504	protein_coding	- && P63048.2 RecName: Full=Ubiquitin-60S ribosomal protein L40; AltName: Full=Ubiquitin A-52 residue ribosomal protein fusion product 1; Contains: RecName: Full=Ubiquitin; Contains: RecName: Full=60S ribosomal protein L40; AltName: Full=CEP52; Flags: Precursor >P63050.2 RecName: Full=Ubiquitin-60S ribosomal protein L40; AltName: Full=Ubiquitin A-52 residue ribosomal protein fusion product 1; Con…	ubiquitin
ENSMUSG00000015467	102.7	109.768	105.066	62.6868	30.0762	57.4068	105.845	50.0566	1.07552	0.000181172	0.00131677	Egfl8	17	34832323	34834945	-	1761	protein_coding	- && Q6GUQ1.2 RecName: Full=Epidermal growth factor-like protein 8; Short=EGF-like protein 8; Flags: Precursor && PF07546:EMI domain|PF07645:Calcium-binding EGF domain	EGF_CA
ENSMUSG00000041361	25.1717	33.7008	31.9768	12.3474	10.7415	20.1987	30.2831	14.4292	1.07302	0.0273352	0.0769949	Myzap	9	71411629	71499642	-	5635	protein_coding	- && - && -	-
ENSMUSG00000068794	129.886	157.912	109.635	71.235	36.5211	80.7947	132.478	62.8503	1.07276	0.00013395	0.00101974	Col28a1	6	7997808	8192617	-	4904	protein_coding	- && Q2UY11.1 RecName: Full=Collagen alpha-1(XXVIII) chain; Flags: Precursor && PF00014:Kunitz/Bovine pancreatic trypsin inhibitor domain|PF00092:von Willebrand factor type A domain	VWA
ENSMUSG00000002980	823.617	1257.52	941.944	475.85	441.476	523.04	1007.69	480.122	1.06976	1.8175e-14	3.15054e-12	Bcam	7	19490056	19504941	-	3199	protein_coding	- && Q9R069.1 RecName: Full=Basal cell adhesion molecule; AltName: Full=B-CAM cell surface glycoprotein; AltName: Full=Lutheran antigen; AltName: CD_antigen=CD239; Flags: Precursor && -	-
ENSMUSG00000039232	52.3571	25.9977	14.6179	14.247	15.0381	14.8832	30.9909	14.7228	1.06966	0.0452947	0.113621	Stx11	10	12813953	12840042	-	4209	protein_coding	- && Q9D3G5.1 RecName: Full=Syntaxin-11 && -	-
ENSMUSG00000109274	91.6249	64.5129	97.7575	17.0964	44.0402	60.596	84.6318	40.5775	1.06843	0.00372039	0.0158019	Gm45133	7	5062276	5065048	-	2773	TEC	- && - && -	-
ENSMUSG00000024846	73.5013	114.583	84.0532	64.5864	36.5211	28.7034	90.7124	43.2703	1.0607	0.00128304	0.0066594	Cst6	19	5394733	5399602	-	4090	protein_coding	- && - && PF00031:Cystatin domain	-
ENSMUSG00000062758	33.2266	57.7728	40.1993	28.494	22.5572	11.694	43.7329	20.915	1.05855	0.0150987	0.048551	Gm16477	7	131215917	131216717	-	801	processed_pseudogene	- && P12970.2 RecName: Full=60S ribosomal protein L7a; AltName: Full=Surfeit locus protein 3 && PF01248:Ribosomal protein L7Ae/L30e/S12e/Gadd45 family	-
ENSMUSG00000038489	249.703	333.156	423.92	185.211	165.419	132.886	335.593	161.172	1.05775	8.1822e-08	1.90132e-06	Polr2l	7	141051773	141055045	-	1650	protein_coding	- && Q6QN04.1 RecName: Full=DNA-directed RNA polymerases I, II, and III subunit RPABC5; Short=RNA polymerases I, II, and III subunit ABC5; AltName: Full=DNA-directed RNA polymerase III subunit L >P62875.1 RecName: Full=DNA-directed RNA polymerases I, II, and III subunit RPABC5; Short=RNA polymerases I, II, and III subunit ABC5; AltName: Full=DNA-directed RNA polymerase III subunit L; AltName: Ful…	-
ENSMUSG00000020857	31.2129	25.0349	31.9768	9.49799	11.8157	21.2618	29.4082	14.1918	1.05752	0.034143	0.091556	Nme2	11	93840640	93847085	-	1171	protein_coding	- && Q01768.1 RecName: Full=Nucleoside diphosphate kinase B; Short=NDK B; Short=NDP kinase B; AltName: Full=Histidine protein kinase NDKB; AltName: Full=P18; AltName: Full=nm23-M2 && PF00334:Nucleoside diphosphate kinase	NDK
ENSMUSG00000006154	153.044	238.794	185.465	37.992	118.157	122.255	192.434	92.8012	1.05407	0.0433567	0.109893	Eps8l1	7	4463673	4483486	+	6036	protein_coding	- && - && PF08416:Phosphotyrosine-binding domain|PF00018:SH3 domain	SH3_1
ENSMUSG00000034164	192.312	103.991	112.375	56.988	52.6334	87.1733	136.226	65.5982	1.05405	0.000238567	0.00165204	Emid1	11	5056265	5102257	-	2890	protein_coding	- && Q91VF5.1 RecName: Full=EMI domain-containing protein 1; AltName: Full=Emilin and multimerin domain-containing protein 1; Short=Emu1; Flags: Precursor && PF01391:Collagen triple helix repeat (20 copies)|PF07546:EMI domain	Collagen
ENSMUSG00000030865	141.968	110.731	105.98	75.984	35.447	60.596	119.56	57.3423	1.05351	0.000200178	0.00143279	Chp2	7	121818719	121822047	+	1603	protein_coding	- && - && PF13499:EF-hand domain pair	-
ENSMUSG00000010021	1051.17	545.953	545.432	335.279	205.163	492.21	714.185	344.217	1.05283	0.0299881	0.0826782	Kif19a	11	114656214	114681565	+	4068	protein_coding	- && Q99PT9.2 RecName: Full=Kinesin-like protein KIF19 && PF00225:Kinesin motor domain	Kinesin
ENSMUSG00000038357	30.206	58.7356	29.2359	35.1426	12.8898	8.50471	39.3925	18.8457	1.05112	0.0425824	0.108404	Camp	9	109676447	109678685	-	758	protein_coding	- && P51437.2 RecName: Full=Cathelicidin antimicrobial peptide; AltName: Full=Cathelin-like protein; Short=CLP; Contains: RecName: Full=Cathelin-related antimicrobial peptide; Short=Cramp; Flags: Precursor && PF00666:Cathelicidin|PF12153:LPS binding domain of CAP18 (C terminal)	-
ENSMUSG00000006360	108.742	130.952	149.834	67.4358	64.449	56.3437	129.842	62.7428	1.04932	1.56926e-05	0.000170015	Crip1	12	113109936	113117499	+	2280	protein_coding	- && P63255.2 RecName: Full=Cysteine-rich protein 1; Short=CRP-1; AltName: Full=Cysteine-rich intestinal protein; Short=CRIP >P63254.2 RecName: Full=Cysteine-rich protein 1; Short=CRP-1; AltName: Full=Cysteine-rich intestinal protein; Short=CRIP && -	-
ENSMUSG00000060586	296.019	219.536	201.91	159.566	62.3007	124.381	239.155	115.416	1.04624	4.5729e-05	0.000415696	H2-Eb1	17	34524841	34535648	+	1944	protein_coding	- && P04230.1 RecName: Full=H-2 class II histocompatibility antigen, E-B beta chain; Flags: Precursor && -	-
ENSMUSG00000016503	96.6593	105.917	107.807	67.4358	42.966	39.3343	103.461	49.912	1.0456	0.000180283	0.00131472	Gtf3a	5	146885467	146892424	+	2548	protein_coding	- && - && PF00096:Zinc finger, C2H2 type	zf-C2H2
ENSMUSG00000001506	1749.94	764.526	724.502	579.378	393.139	597.456	1079.65	523.324	1.04457	0.0227414	0.0668285	Col1a1	11	94827050	94843868	+	6563	protein_coding	- && P11087.4 RecName: Full=Collagen alpha-1(I) chain; AltName: Full=Alpha-1 type I collagen; Flags: Precursor && -	-
ENSMUSG00000041481	15.103	70.2902	39.2857	19.9458	19.3347	21.2618	41.5596	20.1808	1.04407	0.0361791	0.0956503	Serpina3g	12	104202504	104208198	+	2105	protein_coding	- && - && PF00079:Serpin (serine protease inhibitor)	Serpin
ENSMUSG00000021606	431.946	523.806	772.924	302.036	310.43	228.564	576.225	280.343	1.03992	1.51877e-08	4.51921e-07	Ndufs6	13	73467957	73476661	-	898	protein_coding	- && P52503.2 RecName: Full=NADH dehydrogenase [ubiquinone] iron-sulfur protein 6, mitochondrial; AltName: Full=Complex I-13kD-A; Short=CI-13kD-A; AltName: Full=NADH-ubiquinone oxidoreductase 13 kDa-A subunit; Flags: Precursor && PF10276:Zinc-finger domain	-
ENSMUSG00000078193	232.586	262.866	221.096	112.076	94.5253	142.454	238.85	116.352	1.03771	7.81866e-08	1.82528e-06	Gm2000	1	156193610	156194054	+	445	protein_coding	- && P17078.3 RecName: Full=60S ribosomal protein L35 >Q6ZWV7.1 RecName: Full=60S ribosomal protein L35 && PF00831:Ribosomal L29 protein	-
ENSMUSG00000023484	946.455	2707.62	2104.07	923.205	1015.07	869.606	1919.38	935.961	1.03618	0.0164854	0.0519682	Prph	15	98953055	98956859	+	1999	protein_coding	- && - && PF00038:Intermediate filament protein|PF04732:Intermediate filament head (DNA binding) region	Filament
ENSMUSG00000050552	373.548	505.512	490.615	286.839	207.311	174.347	456.558	222.832	1.03241	6.4952e-09	2.13874e-07	Lamtor4	5	138253744	138257660	+	1302	protein_coding	- && - && -	-
ENSMUSG00000070858	432.953	619.131	562.791	224.153	240.61	326.368	538.292	263.71	1.03138	4.13857e-10	2.03967e-08	Gm1673	5	34140777	34142357	+	669	protein_coding	- && Q3UR78.2 RecName: Full=Neuropeptide-like protein C4orf48 homolog; Flags: Precursor && PF15161:Neuropeptide-like	-
ENSMUSG00000034041	71.4876	43.3296	55.7309	22.7952	25.7796	35.0819	56.8494	27.8856	1.0297	0.00497592	0.0199686	Lyl1	8	85428078	85431569	+	2033	protein_coding	- && P27792.2 RecName: Full=Protein lyl-1; AltName: Full=Lymphoblastic leukemia-derived sequence 1 && -	-
ENSMUSG00000062081	177.209	229.165	265.864	128.223	108.489	92.4887	224.079	109.734	1.02886	7.42308e-07	1.26352e-05	Gm6055	14	48316832	48317209	-	378	processed_pseudogene	- && Q9CQV6.3 RecName: Full=Microtubule-associated proteins 1A/1B light chain 3B; AltName: Full=Autophagy-related protein LC3 B; AltName: Full=Autophagy-related ubiquitin-like modifier LC3 B; AltName: Full=MAP1 light chain 3-like protein 2; AltName: Full=MAP1A/MAP1B light chain 3 B; Short=MAP1A/MAP1B LC3 B; AltName: Full=Microtubule-associated protein 1 light chain 3 beta; Flags: Precursor && PF0…	-
ENSMUSG00000029546	135.927	119.397	99.5847	49.3896	56.93	68.0377	118.303	58.1191	1.02674	6.02214e-05	0.000524062	Uncx	5	139529249	139533934	+	3136	protein_coding	- && O08934.2 RecName: Full=Homeobox protein unc-4 homolog; AltName: Full=Homeobox protein Uncx4.1 && PF00046:Homeobox domain	Homeobox
ENSMUSG00000067071	183.25	249.386	211.047	84.5322	87.0062	145.643	214.561	105.727	1.02383	5.95987e-06	7.4098e-05	Hes6	1	91339205	91341760	-	1808	protein_coding	- && - && PF07527:Hairy Orange|PF00010:Helix-loop-helix DNA-binding domain	Hairy_orange
ENSMUSG00000027750	34.2335	50.0697	24.6678	15.1968	22.5572	15.9463	36.3237	17.9001	1.02289	0.0253798	0.0725852	Postn	3	54268530	54298458	+	8702	protein_coding	- && Q62009.2 RecName: Full=Periostin; Short=PN; AltName: Full=Osteoblast-specific factor 2; Short=OSF-2; Flags: Precursor && PF02469:Fasciclin domain	-
ENSMUSG00000031491	21.1442	69.3273	31.9768	22.7952	22.5572	14.8832	40.8161	20.0785	1.02241	0.0342382	0.0917461	Chrna6	8	27893240	27903972	-	2906	protein_coding	- && - && PF02932:Neurotransmitter-gated ion-channel transmembrane region|PF02931:Neurotransmitter-gated ion-channel ligand binding domain	Neur_chan_memb
ENSMUSG00000009246	38.261	22.1462	30.1495	20.8956	7.51905	15.9463	30.1856	14.787	1.02011	0.0448017	0.112703	Trpm5	7	142622890	142648379	-	6398	protein_coding	- && - && PF00520:Ion transport protein	Ion_trans
ENSMUSG00000095524	37.2541	67.4016	60.299	45.5904	27.9279	7.44162	54.9849	26.9866	1.01964	0.0291881	0.0809017	Gm15682	5	88887106	88887588	-	483	processed_pseudogene	- && P46778.2 RecName: Full=60S ribosomal protein L21 && PF01157:Ribosomal protein L21e	-
ENSMUSG00000019362	490.344	608.54	764.701	287.789	337.283	296.602	621.195	307.225	1.01746	3.70694e-11	2.49573e-09	D8Ertd738e	8	84972867	84976348	-	616	protein_coding	- && - && -	-
ENSMUSG00000062329	38.261	42.3667	40.1993	16.1466	23.6313	20.1987	40.2757	19.9922	1.01504	0.013025	0.0431443	Cytl1	5	37892863	37897164	+	1056	protein_coding	- && - && PF15153:Cytokine-like protein 1	-
ENSMUSG00000026208	65.4464	46.2182	163.538	44.6406	36.5211	55.2806	91.7343	45.4808	1.01478	0.00943723	0.0335905	Des	1	75336973	75345223	+	3754	protein_coding	- && - && -	-
ENSMUSG00000068220	751.123	772.229	729.984	454.954	346.951	312.548	751.112	371.484	1.01314	3.13069e-14	5.13195e-12	Lgals1	15	78810925	78814665	+	903	protein_coding	- && P16045.3 RecName: Full=Galectin-1; Short=Gal-1; AltName: Full=14 kDa lectin; AltName: Full=Beta-galactoside-binding lectin L-14-I; AltName: Full=Galaptin; AltName: Full=Lactose-binding lectin 1; AltName: Full=Lectin galactoside-binding soluble 1; AltName: Full=S-Lac lectin 1 && PF00337:Galactoside-binding lectin	-
ENSMUSG00000002985	25358	27868.6	28305.8	12926.8	13720.1	13757.4	27177.5	13468.1	1.01295	2.47979e-53	3.73977e-49	Apoe	7	19430034	19433113	-	2138	protein_coding	- && - && PF01442:Apolipoprotein A1/A4/E domain	-
ENSMUSG00000042677	39.2678	41.4038	31.0631	18.996	17.1864	19.1356	37.2449	18.4393	1.0123	0.0170089	0.0533176	Zc3h12a	4	125012216	125021633	-	2882	protein_coding	- && - && PF11977:Zc3h12a-like Ribonuclease NYN domain	-
ENSMUSG00000020475	47.3228	45.2553	126.993	40.8414	42.966	25.5141	73.1905	36.4405	1.00794	0.0128005	0.0425675	Pgam2	11	5751640	5753733	-	840	protein_coding	- && O70250.3 RecName: Full=Phosphoglycerate mutase 2; AltName: Full=BPG-dependent PGAM 2; AltName: Full=Muscle-specific phosphoglycerate mutase; AltName: Full=Phosphoglycerate mutase isozyme M; Short=PGAM-M && PF00300:Histidine phosphatase superfamily (branch 1)	-
ENSMUSG00000061518	1729.8	2048.04	2582.81	1140.71	1126.78	896.184	2120.22	1054.56	1.00762	3.10672e-15	6.33142e-13	Cox5b	1	36730530	36732762	+	1587	protein_coding	- && P12075.2 RecName: Full=Cytochrome c oxidase subunit 5B, mitochondrial; AltName: Full=Cytochrome c oxidase polypeptide Vb; AltName: Full=Cytochrome c oxidase subunit VIA*; Flags: Precursor && PF01215:Cytochrome c oxidase subunit Vb	-
ENSMUSG00000060512	70.4807	83.7705	57.5582	38.9418	37.5953	28.7034	70.6031	35.0801	1.00618	0.00178437	0.00873138	0610040J01Rik	5	63969706	64056968	+	2403	protein_coding	- && Q99K99.2 RecName: Full=Uncharacterized protein C4orf19 homolog && PF15770:Domain of unknown function (DUF4699)	-
ENSMUSG00000083087	43.2953	58.7356	66.6944	27.5442	24.7055	31.8927	56.2418	28.0474	1.00591	0.00486268	0.0195819	Gm11249	4	67849118	67849976	+	859	processed_pseudogene	- && - && PF00333:Ribosomal protein S5, N-terminal domain	-
ENSMUSG00000086119	114.783	95.3251	117.857	62.6868	41.8919	58.4699	109.322	54.3495	1.00519	0.000138595	0.00105086	Gm2415	9	118719143	118755523	-	3735	lncRNA	- && - && -	-
ENSMUSG00000056737	373.548	292.715	264.037	182.361	96.6736	183.914	310.1	154.316	1.00384	3.06897e-06	4.21522e-05	Capg	6	72521374	72539966	+	2529	protein_coding	- && - && PF00626:Gelsolin repeat	-
novel.189	43.2953	53.9212	50.2492	114.926	102.044	79.7316	49.1552	98.9006	-1.00937	0.000231738	0.00161424	-	8	130009326	130013272	-	3525	-	- && - && -	-
ENSMUSG00000070336	30.206	28.8864	27.4086	57.9378	50.4851	66.9746	28.8337	58.4658	-1.02071	0.00274266	0.012395	Fbxo47	11	97744652	97774980	-	2202	protein_coding	- && A2A6H3.2 RecName: Full=F-box only protein 47 && -	-
ENSMUSG00000094568	27.1854	27.9235	12.7907	47.49	48.3368	41.4605	22.6332	45.7624	-1.02112	0.011996	0.0404997	Smarce1-ps1	8	42110630	42111706	-	1077	processed_pseudogene	- && - && PF00505:HMG (high mobility group) box	HMG_box
ENSMUSG00000025592	25.1717	27.9235	37.4585	75.0342	60.1524	48.9021	30.1846	61.3629	-1.02285	0.0033152	0.0143958	Dach2	X	112207207	112746083	+	9868	protein_coding	- && Q925Q8.1 RecName: Full=Dachshund homolog 2; Short=Dach2 && -	-
novel.198	20.1373	36.5894	23.7542	66.486	41.8919	55.2806	26.827	54.5528	-1.02572	0.00659209	0.0250795	-	9	96950240	96951961	-	1722	-	- && - && -	-
novel.169	12.0824	10.5917	12.7907	20.8956	26.8538	25.5141	11.8216	24.4212	-1.04412	0.0444202	1	-	7	58846637	58847487	-	851	-	- && - && -	-
ENSMUSG00000119926	24.1648	25.0349	33.804	54.1386	65.5232	52.0913	27.6679	57.251	-1.04531	0.00286594	0.0128164	Gm25047	X	35627552	35627655	+	104	snRNA	- && - && -	-
ENSMUSG00000107838	42.2884	29.8493	35.6312	80.733	68.7456	73.3531	35.923	74.2772	-1.05058	0.000643643	0.00376962	Gm45769	6	133087437	133089264	+	1828	TEC	- && - && -	-
ENSMUSG00000064365	45.309	40.4409	42.9402	100.679	85.9321	81.8578	42.8967	89.4895	-1.06284	0.000141533	0.00107044	mt-Ts2	MT	11613	11671	+	59	Mt_tRNA	- && - && -	-
ENSMUSG00000111325	10.0687	11.5546	12.7907	24.6948	23.6313	24.451	11.4713	24.259	-1.07862	0.0385568	1	Gm47140	9	122676084	122677483	-	1400	lncRNA	- && - && -	-
novel.19	35.2404	28.8864	45.6811	70.2852	97.7477	65.9115	36.6026	77.9815	-1.0876	0.000667182	0.00388786	-	10	130410343	130413752	-	3410	-	- && - && -	-
ENSMUSG00000102374	9.06181	9.62879	12.7907	18.0462	27.9279	21.2618	10.4938	22.412	-1.08886	0.0492186	1	Gm38387	1	66808449	66811025	-	2577	TEC	- && - && -	-
ENSMUSG00000114493	11.0755	17.3318	9.13621	25.6446	26.8538	28.7034	12.5145	27.0672	-1.11391	0.0287835	1	Gm47071	13	55974063	56232662	+	3089	lncRNA	- && Q9H5L9.1 RecName: Full=Putative uncharacterized protein C5orf66 && -	-
ENSMUSG00000049233	24.1648	19.2576	21.0133	50.3394	17.1864	72.29	21.4786	46.6053	-1.11955	0.0176804	0.0551247	Apoo-ps	13	107550644	107551229	-	586	processed_pseudogene	- && - && PF09769:Apolipoprotein O	-
ENSMUSG00000103713	48.3296	51.9955	47.5083	110.177	109.563	104.183	49.2778	107.974	-1.13209	8.67771e-06	0.000102002	Gm2136	3	45392815	45395391	+	2577	TEC	- && - && -	-
ENSMUSG00000110249	21.1442	20.2205	17.3588	35.1426	44.0402	49.9652	19.5745	43.0493	-1.13648	0.00498167	0.0199854	9330121K16Rik	8	55526284	55530169	+	3886	TEC	- && - && -	-
ENSMUSG00000094151	17.1167	8.66591	10.0498	37.0422	23.6313	18.0725	11.9442	26.2487	-1.14511	0.0352463	1	Gm7233	14	43037324	43045445	+	1761	protein_coding	- && - && PF04822:Takusan	-
ENSMUSG00000067189	37.2541	40.4409	35.6312	74.0844	79.4871	97.8041	37.7754	83.7919	-1.14848	9.80848e-05	0.000784731	Gm7335	17	38024443	38024815	-	373	processed_pseudogene	- && Q9UIL1.2 RecName: Full=Short coiled-coil protein && PF10224:Predicted coiled-coil protein (DUF2205)	-
ENSMUSG00000058626	13.0893	18.2947	14.6179	8.5482	37.5953	57.4068	15.334	34.5167	-1.16449	0.0412728	0.105784	Capn11	17	45941130	45970251	-	2708	protein_coding	- && Q6J756.1 RecName: Full=Calpain-11; AltName: Full=Calcium-activated neutral proteinase 11; Short=CANP 11 && PF00648:Calpain family cysteine protease|PF13833:EF-hand domain pair|PF01067:Calpain large subunit, domain III	Peptidase_C2
ENSMUSG00000096718	22.1511	29.8493	19.1861	55.0884	65.5232	39.3343	23.7288	53.3153	-1.16921	0.00225874	0.0105463	Zfp781	10	81737745	81766314	-	4067	protein_coding	- && P11369.2 RecName: Full=LINE-1 retrotransposable element ORF2 protein; Short=ORF2p; AltName: Full=Long interspersed element-1; Short=L1; AltName: Full=Retrovirus-related Pol polyprotein LINE-1; Includes: RecName: Full=Reverse transcriptase; Includes: RecName: Full=Endonuclease && -	-
ENSMUSG00000078902	20.1373	21.1833	16.4452	33.243	53.7075	43.5866	19.2553	43.5124	-1.17489	0.00433322	0.0178905	Gm14443	2	175008048	175017664	-	4859	protein_coding	- && Q8BZW4.1 RecName: Full=Zinc finger protein 120; AltName: Full=Zinc finger protein 31; Short=mZF31 && PF00096:Zinc finger, C2H2 type|PF01352:KRAB box	KRAB
ENSMUSG00000112169	16.1099	12.5174	21.9269	47.49	39.7436	27.6403	16.8514	38.2913	-1.18373	0.0083149	0.0303478	Gm48536	12	46729928	46733257	-	3330	TEC	- && - && -	-
ENSMUSG00000084067	33.2266	44.2924	28.3223	107.327	77.3388	55.2806	35.2804	79.9823	-1.1851	0.00043685	0.00274929	Gm14269	2	170305434	170305739	-	306	processed_pseudogene	- && P63165.1 RecName: Full=Small ubiquitin-related modifier 1; Short=SUMO-1; AltName: Full=GAP-modifying protein 1; Short=GMP1; AltName: Full=SMT3 homolog 3; AltName: Full=Sentrin; AltName: Full=Ubiquitin-homology domain protein PIC1; AltName: Full=Ubiquitin-like protein SMT3C; Short=Smt3C; AltName: Full=Ubiquitin-like protein UBL1; Flags: Precursor >P63166.1 RecName: Full=Small ubiquitin-relate…	-
ENSMUSG00000063383	12.0824	13.4803	10.9635	32.2932	25.7796	25.5141	12.1754	27.8623	-1.19734	0.0163872	1	Zfp947	17	22363340	22385171	-	2872	protein_coding	- && - && PF01352:KRAB box|PF00096:Zinc finger, C2H2 type	KRAB
ENSMUSG00000080824	19.1305	22.1462	10.9635	43.6908	44.0402	31.8927	17.4134	39.8745	-1.20034	0.00626629	0.0240892	Gm9001	6	75759341	75759739	-	399	processed_pseudogene	- && Q9JHG1.1 RecName: Full=Phosphatidylinositol N-acetylglucosaminyltransferase subunit P; AltName: Full=Down syndrome critical region protein 5 homolog; AltName: Full=Phosphatidylinositol-glycan biosynthesis class P protein; Short=PIG-P && PF08510:PIG-P	-
ENSMUSG00000085687	12.0824	4.8144	10.9635	24.6948	21.483	19.1356	9.28675	21.7711	-1.23148	0.0351089	1	Gm16153	10	4359033	4373369	+	4118	lncRNA	- && - && -	-
ENSMUSG00000103174	13.0893	16.3689	15.5316	29.4438	38.6694	38.2712	14.9966	35.4615	-1.23801	0.00579133	0.0226267	Gm37168	1	190999375	191020911	+	1452	lncRNA	- && - && -	-
ENSMUSG00000057246	13.0893	5.77728	11.8771	20.8956	20.4089	31.8927	10.2479	24.399	-1.25081	0.0257926	1	BC051142	17	34617794	34679708	+	4073	protein_coding	- && - && -	-
ENSMUSG00000102817	8.05494	7.70303	11.8771	18.0462	22.5572	25.5141	9.21168	22.0392	-1.25237	0.0282549	1	Gm6185	1	161004506	161064877	+	3866	transcribed_unprocessed_pseudogene	- && Q5TAH2.1 RecName: Full=Sodium/hydrogen exchanger 11; AltName: Full=Na(+)/H(+) exchanger 11; Short=NHE-11; AltName: Full=Solute carrier family 9 member 11; AltName: Full=Solute carrier family 9 member C2 && -	-
novel.164	22.1511	54.8841	39.2857	94.9799	104.193	78.6685	38.7736	92.6137	-1.25337	0.000105522	0.000834053	-	7	14370527	14377837	+	4869	-	- && P11369.2 RecName: Full=LINE-1 retrotransposable element ORF2 protein; Short=ORF2p; AltName: Full=Long interspersed element-1; Short=L1; AltName: Full=Retrovirus-related Pol polyprotein LINE-1; Includes: RecName: Full=Reverse transcriptase; Includes: RecName: Full=Endonuclease && -	-
ENSMUSG00000090963	9.06181	15.4061	11.8771	29.4438	26.8538	30.8296	12.115	29.0424	-1.25967	0.0114002	1	Gm17655	5	110194005	110220379	-	1776	protein_coding	- && - && PF01352:KRAB box|PF00096:Zinc finger, C2H2 type	KRAB
ENSMUSG00000116808	14.0961	11.5546	15.5316	34.1928	38.6694	26.5772	13.7274	33.1465	-1.27091	0.00671195	0.0254329	Gm20164	16	20401859	20402174	+	316	processed_pseudogene	- && Q96DA6.3 RecName: Full=Mitochondrial import inner membrane translocase subunit TIM14; AltName: Full=DnaJ homolog subfamily C member 19 >Q5RF34.3 RecName: Full=Mitochondrial import inner membrane translocase subunit TIM14; AltName: Full=DnaJ homolog subfamily C member 19 && -	-
ENSMUSG00000102143	14.0961	2.88864	10.0498	30.3936	26.8538	11.694	9.01154	22.9804	-1.35638	0.0340631	1	Gm38057	9	71759283	71762485	-	3203	TEC	- && - && -	-
ENSMUSG00000078887	31.2129	15.4061	21.9269	68.3856	21.483	88.2363	22.8486	59.3683	-1.38123	0.00288225	0.0128678	Gm6710	2	175661012	175673041	+	3440	protein_coding	- && - && -	-
ENSMUSG00000073538	6.0412	31.775	14.6179	38.9418	58.0041	40.3974	17.4781	45.7811	-1.38493	0.0046271	0.018809	E330020D12Rik	1	153280573	153289979	-	2287	lncRNA	- && - && -	-
ENSMUSG00000109771	14.0961	6.74016	4.56811	24.6948	17.1864	24.451	8.46813	22.1107	-1.39597	0.0218687	1	Gm35315	5	110224002	110242286	-	3693	protein_coding	- && E9QAG8.1 RecName: Full=Zinc finger protein 431; AltName: Full=Zinc finger protein 932 && PF00096:Zinc finger, C2H2 type|PF01352:KRAB box	KRAB
ENSMUSG00000027901	2.01373	6.74016	10.0498	18.0462	16.1123	15.9463	6.26791	16.7016	-1.40342	0.0441081	1	Dennd2d	3	106389721	106410346	+	6868	protein_coding	- && Q91VV4.1 RecName: Full=DENN domain-containing protein 2D && PF03455:dDENN domain|PF03456:uDENN domain|PF02141:DENN (AEX-3) domain	DENN
ENSMUSG00000056531	15.103	8.66591	10.9635	37.992	39.7436	18.0725	11.5775	31.936	-1.46852	0.00484018	0.0195069	Ccdc18	5	108280741	108381494	+	6433	protein_coding	- && Q640L5.1 RecName: Full=Coiled-coil domain-containing protein 18 && -	-
ENSMUSG00000064342	12.0824	6.74016	9.13621	18.0462	27.9279	34.0188	9.31959	26.6643	-1.5158	0.00638455	1	mt-Ti	MT	3706	3774	+	69	Mt_tRNA	- && - && -	-
ENSMUSG00000064354	2703.44	2889.6	2916.28	16459.1	3285.83	5253.78	2836.44	8332.9	-1.55476	0.0287611	0.0800436	mt-Co2	MT	7013	7696	+	684	protein_coding	- && - && -	-
ENSMUSG00000009070	9.06181	3.85152	2.74086	15.1968	6.4449	24.451	5.21806	15.3642	-1.56884	0.0440559	1	Rsph14	10	74793309	74868418	-	3012	protein_coding	- && Q9D3W1.1 RecName: Full=Radial spoke head 14 homolog; AltName: Full=Rhabdoid tumor deletion region protein 1 && PF13646:HEAT repeats	-
ENSMUSG00000118138	12.0824	3.85152	7.30897	19.9458	27.9279	21.2618	7.74763	23.0452	-1.57652	0.0092824	1	Gm50322	19	9842288	9846359	-	4072	lncRNA	- && - && -	-
ENSMUSG00000112410	13.0893	12.5174	20.0997	63.6366	35.447	39.3343	15.2355	46.1393	-1.5982	0.000304117	0.00202133	B230217J21Rik	12	46714100	46739775	+	3896	lncRNA	- && - && -	-
ENSMUSG00000080888	4.02747	5.77728	2.74086	6.6486	13.964	19.1356	4.18187	13.2494	-1.66168	0.0391058	1	Gm14387	2	174928294	174931711	+	2055	unprocessed_pseudogene	- && - && -	-
ENSMUSG00000086358	2.01373	3.85152	5.48173	18.996	6.4449	10.6309	3.78233	12.0239	-1.66614	0.0496388	1	Gm13270	2	13276412	13330638	+	4357	lncRNA	- && - && -	-
ENSMUSG00000100671	2.01373	5.77728	5.48173	8.5482	21.483	12.7571	4.42425	14.2628	-1.67663	0.0324408	1	Gm28322	1	50943603	50945077	+	1475	lncRNA	- && - && -	-
ENSMUSG00000112547	7.04807	8.66591	2.74086	20.8956	21.483	19.1356	6.15162	20.5047	-1.74465	0.00703797	1	Gm47096	12	44267170	44315901	-	2086	lncRNA	- && - && -	-
ENSMUSG00000043289	5.03434	3.85152	0.913621	12.3474	7.51905	12.7571	3.26649	10.8745	-1.75005	0.0498578	1	Mei4	9	81745723	82088060	+	4121	protein_coding	- && - && PF13971:Meiosis-specific protein Mei4	-
ENSMUSG00000083708	7.04807	5.77728	6.39535	23.745	30.0762	11.694	6.4069	21.8384	-1.77065	0.00570097	1	Gm13123	4	143974347	143974838	+	492	processed_pseudogene	- && E9PVA8.1 RecName: Full=eIF-2-alpha kinase activator GCN1; AltName: Full=GCN1 eIF-2-alpha kinase activator homolog; AltName: Full=GCN1-like protein 1; AltName: Full=General control of amino-acid synthesis 1-like protein 1; AltName: Full=Translational activator GCN1 && -	-
ENSMUSG00000062284	1.00687	4.8144	4.56811	14.247	18.2606	4.25235	3.46312	12.2533	-1.81456	0.0422127	1	Gm6030	16	45025463	45025852	+	390	processed_pseudogene	- && - && PF01282:Ribosomal protein S24e	Ribosomal_S24e
ENSMUSG00000087192	2.01373	6.74016	2.74086	6.6486	20.4089	13.8202	3.83158	13.6259	-1.82355	0.0287616	1	Lexis1	4	53205066	53217857	-	1615	lncRNA	- && - && -	-
ENSMUSG00000064361	13.0893	32.7379	3.65449	57.9378	40.8177	80.7947	16.4939	59.8501	-1.86358	0.000278808	0.00187878	mt-Tr	MT	9808	9875	+	68	Mt_tRNA	- && - && -	-
ENSMUSG00000031293	2.01373	2.88864	7.30897	14.247	21.483	9.5678	4.07045	15.0993	-1.87677	0.0175797	1	Rs1	X	159551009	159582659	+	5840	protein_coding	- && Q9Z1L4.1 RecName: Full=Retinoschisin; AltName: Full=X-linked juvenile retinoschisis protein homolog; Flags: Precursor && -	-
ENSMUSG00000108042	3.0206	3.85152	1.82724	7.5984	6.4449	18.0725	2.89979	10.7053	-1.88633	0.0404628	1	B130021K23Rik	6	87807256	87809848	-	2593	TEC	- && - && -	-
ENSMUSG00000105655	3.0206	2.88864	2.74086	7.5984	15.0381	9.5678	2.88337	10.7348	-1.89382	0.0337552	1	Gm42659	3	104743746	104745499	-	1754	lncRNA	- && - && -	-
ENSMUSG00000087022	2.01373	3.85152	1.82724	12.3474	13.964	4.25235	2.56416	10.1879	-1.99334	0.0375402	1	9130024F11Rik	1	57010571	57089243	+	5779	lncRNA	- && - && -	-
ENSMUSG00000029254	3.0206	3.85152	2.74086	14.247	12.8898	11.694	3.20433	12.9436	-2.01652	0.0138088	1	Stap1	5	86219605	86253984	+	6215	protein_coding	- && - && PF00169:PH domain	PH
ENSMUSG00000111498	1.00687	2.88864	1.82724	7.5984	8.59321	9.5678	1.90758	8.58647	-2.16431	0.0361424	1	Gm47059	9	120088694	120093424	+	1876	lncRNA	- && - && -	-
ENSMUSG00000115373	2.01373	3.85152	0	9.49799	12.8898	6.37853	1.95508	9.58878	-2.30667	0.0286537	1	Gm49194	14	45510707	45512180	+	1474	lncRNA	- && - && -	-
ENSMUSG00000082765	0	0.962879	3.65449	11.3976	9.66736	3.18927	1.53912	8.08474	-2.3693	0.0451004	1	Gm14411	2	176817256	176819502	-	914	unprocessed_pseudogene	- && Q8BZW4.1 RecName: Full=Zinc finger protein 120; AltName: Full=Zinc finger protein 31; Short=mZF31 && PF13465:Zinc-finger double domain|PF01352:KRAB box	KRAB
ENSMUSG00000098985	1.00687	0	2.74086	5.6988	7.51905	7.44162	1.24924	6.88649	-2.44253	0.0485794	1	Gm27219	9	36724429	36725170	-	742	processed_pseudogene	- && - && PF01798:snoRNA binding domain, fibrillarin	-
ENSMUSG00000104165	1.00687	1.92576	0.913621	9.49799	4.2966	8.50471	1.28208	7.4331	-2.54032	0.0319675	1	Gm38249	1	16278421	16280741	-	2321	TEC	- && - && -	-
ENSMUSG00000107373	2.01373	0.962879	0.913621	7.5984	10.7415	5.31544	1.29675	7.88511	-2.61477	0.02461	1	Gm42668	5	73172542	73175028	+	2487	TEC	- && Q80SU3.1 RecName: Full=Zygote arrest protein 1; AltName: Full=Oocyte-specific maternal effect factor && -	-
ENSMUSG00000072844	2.01373	1.92576	4.56811	25.6446	29.0021	3.18927	2.83587	19.2786	-2.75666	0.00167231	1	G530011O06Rik	X	168758039	168761913	-	2380	lncRNA	- && - && -	-
ENSMUSG00000079402	0	3.85152	6.39535	24.6948	52.6334	3.18927	3.41562	26.8391	-2.95556	0.000772931	1	Gm3020	14	18796558	18817743	-	1933	protein_coding	- && - && -	-
ENSMUSG00000107280	0	0	1.82724	6.6486	3.22245	6.37853	0.609081	5.41653	-3.11073	0.0477043	1	Gm9495	8	69880632	69906217	-	2512	protein_coding	- && - && PF13857:Ankyrin repeats (many copies)	-
ENSMUSG00000097086	0	0	1.82724	11.3976	5.37075	2.12618	0.609081	6.29817	-3.33215	0.0319642	1	Gm7672	10	21922013	21922884	-	872	processed_pseudogene	- && Q6ZUT1.2 RecName: Full=Uncharacterized protein C11orf57 && -	-
ENSMUSG00000091102	1.00687	0	0	1.8996	4.2966	7.44162	0.335622	4.54594	-3.71865	0.0351035	1	5830462I19Rik	9	110201116	110204498	-	3383	TEC	- && - && -	-
ENSMUSG00000105282	0	0	0.913621	9.49799	3.22245	1.06309	0.30454	4.59451	-3.74802	0.037873	1	Gm42981	5	44649512	44652763	-	3252	TEC	- && - && -	-
ENSMUSG00000096878	0	0.962879	0	7.5984	4.2966	2.12618	0.32096	4.67373	-3.7694	0.0313579	1	Gm21083	5	15782331	15787076	+	1141	protein_coding	- && Q8TDM6.4 RecName: Full=Disks large homolog 5; AltName: Full=Discs large protein P-dlg; AltName: Full=Placenta and prostate DLG && PF04822:Takusan	-
ENSMUSG00000115005	0	0.962879	0	6.6486	3.22245	4.25235	0.32096	4.7078	-3.77834	0.0289912	1	Gm49195	15	34531706	34531844	+	139	processed_pseudogene	- && - && -	-
ENSMUSG00000030344	0	0	0.913621	0	10.7415	4.25235	0.30454	4.99795	-3.85299	0.0392041	1	Akap3	6	126830061	126851271	+	3153	protein_coding	- && O88987.2 RecName: Full=A-kinase anchor protein 3; Short=AKAP-3; AltName: Full=A-kinase anchor protein 110 kDa; Short=AKAP 110; AltName: Full=Protein kinase A-anchoring protein 3; Short=PRKA3 && PF05716:A-kinase anchor protein 110 kDa (AKAP 110)	-
ENSMUSG00000106824	0	0	0.913621	7.5984	7.51905	1.06309	0.30454	5.39351	-3.97347	0.0214996	1	Gm7697	8	69933998	69975628	-	2507	protein_coding	- && - && PF13857:Ankyrin repeats (many copies)	-
ENSMUSG00000111308	0	0.962879	0	14.247	2.1483	1.06309	0.32096	5.81946	-4.0908	0.0199559	1	Gm48710	9	41140178	41143487	+	3310	TEC	- && - && -	-
ENSMUSG00000084959	0	0	0	2.8494	5.37075	1.06309	0	3.09441	-4.1295	0.0461833	1	4933407I08Rik	18	43068535	43071952	+	1294	lncRNA	- && - && -	-
ENSMUSG00000078173	0	0	0	1.8996	2.1483	5.31544	0	3.12111	-4.14016	0.043151	1	Lenep	3	89308295	89310100	-	1806	protein_coding	- && Q9WVB6.1 RecName: Full=Lens epithelial cell protein LEP503 && -	-
ENSMUSG00000115793	0	0	0	1.8996	4.2966	3.18927	0	3.12849	-4.14296	0.0415139	1	Gm48961	15	35860656	35863514	+	2859	TEC	- && - && -	-
ENSMUSG00000107178	0	0	0	1.8996	6.4449	1.06309	0	3.13586	-4.14607	0.0463678	1	Gm42531	5	150485776	150489823	+	4048	lncRNA	- && - && -	-
novel.190	0	0	0	4.749	1.07415	4.25235	0	3.3585	-4.25258	0.0348422	1	-	9	21176230	21176455	+	226	-	- && - && -	-
ENSMUSG00000107856	0	0	0	1.8996	7.51905	1.06309	0	3.49391	-4.30161	0.0336377	1	Gm7838	6	95902722	95903910	-	1189	processed_pseudogene	- && P22234.3 RecName: Full=Multifunctional protein ADE2; Includes: RecName: Full=Phosphoribosylaminoimidazole-succinocarboxamide synthase; AltName: Full=SAICAR synthetase; Includes: RecName: Full=Phosphoribosylaminoimidazole carboxylase; AltName: Full=AIR carboxylase; Short=AIRC && -	-
ENSMUSG00000102319	0	0	0	3.7992	6.4449	1.06309	0	3.76906	-4.41476	0.02405	1	Gm37626	1	44600045	44604607	+	4563	TEC	- && - && -	-
ENSMUSG00000092490	0	0.962879	0.913621	18.996	23.6313	1.06309	0.6255	14.5635	-4.51871	0.000927122	1	Gm20482	7	8858846	8865850	-	1644	transcribed_unprocessed_pseudogene	- && - && -	-
ENSMUSG00000116628	0	0	0	8.5482	3.22245	1.06309	0	4.27791	-4.60541	0.015646	1	4930478L05Rik	16	78357204	78361757	+	1880	lncRNA	- && - && -	-
Significantly up or down-regulated DEGs between GS+GeXIVA and GS+NS group, values of gene expression were illustrated as normalized read count

## Sheet: OXL_GeXIVAvsOXL_NS_deg_all
gene_id	OXL_GeXIVA_1	OXL_GeXIVA_2	OXL_GeXIVA_3	OXL_NS_1	OXL_NS_2	OXL_NS_3	OXL_GeXIVA	OXL_NS	log2FoldChange	pvalue	padj	gene_name	gene_chr	gene_start	gene_end	gene_strand	gene_length	gene_biotype	gene_description	tf_family
ENSMUSG00000073940	60.9492	17.7333	2.95561	0	0	0	27.2127	0	7.13081	0.000681438	1	Hbb-bt	7	103461731	103463203	-	703	protein_coding	- && P02088.2 RecName: Full=Hemoglobin subunit beta-1; AltName: Full=Beta-1-globin; AltName: Full=Hemoglobin beta-1 chain; AltName: Full=Hemoglobin beta-major chain && PF00042:Globin	-
ENSMUSG00000095675	5.29993	0.933332	10.8372	0	0	0	5.69016	0	4.86908	0.00608418	1	Ccl21b	4	42255693	42256825	+	869	protein_coding	- && - && PF00048:Small cytokines (intecrine/chemokine), interleukin-8 like	-
ENSMUSG00000084284	2.64997	3.73333	8.86682	0	0	0	5.08337	0	4.70514	0.00786082	1	Tpt1-ps6	X	100812141	100812663	+	523	processed_pseudogene	- && P63029.1 RecName: Full=Translationally-controlled tumor protein; Short=TCTP; AltName: Full=Lens epithelial protein >P63028.1 RecName: Full=Translationally-controlled tumor protein; Short=TCTP; AltName: Full=21 kDa polypeptide; AltName: Full=p21; AltName: Full=p23 && PF00838:Translationally controlled tumour protein	-
ENSMUSG00000112099	4.41661	5.59999	4.92601	0	0	0	4.98087	0	4.67977	0.00744713	1	Gm8960	10	115434931	115436233	-	788	processed_pseudogene	- && P97351.3 RecName: Full=40S ribosomal protein S3a; AltName: Full=Protein TU-11 && -	-
ENSMUSG00000107233	5.29993	8.39999	0.985202	0	0	0	4.89504	0	4.65803	0.0107595	1	Gm42959	6	3190691	3190902	+	212	TEC	- && P03975.1 RecName: Full=IgE-binding protein && -	-
ENSMUSG00000113196	1.76664	2.8	8.86682	0	0	0	4.47782	0	4.52103	0.0148107	1	D230049E03Rik	12	98732364	98736614	+	4251	TEC	- && - && -	-
ENSMUSG00000097761	0.883322	3.73333	6.89641	0	0	0	3.83769	0	4.29858	0.0274409	1	4930534D22Rik	3	131096292	131110310	+	2715	lncRNA	- && Q9CX98.2 RecName: Full=Cytochrome P450 2U1 && -	-
ENSMUSG00000097043	1.76664	7.46665	1.9704	0	0	0	3.73457	0	4.26454	0.0289082	1	Gm10556	18	4812486	4850959	+	3906	lncRNA	- && - && -	-
ENSMUSG00000022617	4.41661	2.8	3.94081	0	0	0	3.71914	0	4.25919	0.0254199	1	Chkb	15	89310563	89314111	-	3061	protein_coding	- && O55229.3 RecName: Full=Choline/ethanolamine kinase; AltName: Full=Choline kinase beta; Short=CK; Short=CKB; AltName: Full=Ethanolamine kinase; Short=EK; AltName: Full=choline/ethanolamine kinase beta; Short=CKEKB && -	-
ENSMUSG00000006574	3.53329	5.59999	1.9704	0	0	0	3.70123	0	4.25333	0.0271075	1	Slc4a1	11	102239650	102257029	-	4891	protein_coding	- && P04919.1 RecName: Full=Band 3 anion transport protein; AltName: Full=Anion exchange protein 1; Short=AE 1; Short=Anion exchanger 1; AltName: Full=MEB3; AltName: Full=Solute carrier family 4 member 1; AltName: CD_antigen=CD233 && PF00955:HCO3- transporter family|PF07565:Band 3 cytoplasmic domain	Band_3_cyto
ENSMUSG00000112728	2.64997	7.46665	0.985202	0	0	0	3.70061	0	4.25309	0.0312232	1	Gm48903	10	117225927	117234492	+	644	lncRNA	- && - && -	-
ENSMUSG00000004948	6.18325	2.8	1.9704	0	0	0	3.65122	0	4.23631	0.0289888	1	Zp3	5	136008953	136017478	+	1323	protein_coding	- && P10761.4 RecName: Full=Zona pellucida sperm-binding protein 3; AltName: Full=Sperm receptor; AltName: Full=Zona pellucida glycoprotein 3; Short=Zp-3; AltName: Full=Zona pellucida protein C; Contains: RecName: Full=Processed zona pellucida sperm-binding protein 3; Flags: Precursor && PF00100:Zona pellucida-like domain	Zona_pellucida
ENSMUSG00000097149	7.06658	9.33332	3.94081	0	0	1.04089	6.78023	0.346965	4.16516	0.00889697	1	G630030J09Rik	7	30848953	30852132	+	2135	lncRNA	- && - && -	-
ENSMUSG00000081593	2.64997	4.66666	2.95561	0	0	0	3.42408	0	4.13914	0.0345203	1	Gm11841	4	12125290	12127252	+	1963	processed_pseudogene	- && - && PF00076:RNA recognition motif. (a.k.a. RRM, RBD, or RNP domain)	RRM_1
ENSMUSG00000081153	1.76664	7.46665	0.985202	0	0	0	3.40617	0	4.13272	0.0422947	1	Gm11401	11	6192378	6192721	+	344	processed_pseudogene	- && - && -	-
ENSMUSG00000018168	5.29993	2.8	1.9704	0	0	0	3.35678	0	4.11447	0.0380017	1	Ikzf3	11	98355728	98436857	-	8754	protein_coding	- && - && PF00096:Zinc finger, C2H2 type	zf-C2H2
ENSMUSG00000117926	6.18325	1.86666	1.9704	0	0	0	3.34011	0	4.10815	0.0403582	1	C030004G16Rik	18	42748700	42755524	-	1671	lncRNA	- && - && -	-
ENSMUSG00000103957	7.06658	1.86666	0.985202	0	0	0	3.30615	0	4.09514	0.0455129	1	Gm10766	2	127111369	127111974	-	606	TEC	- && - && -	-
ENSMUSG00000102298	1.76664	3.73333	3.94081	0	0	0	3.14693	0	4.01511	0.0465697	1	Gm33707	3	60677308	60677876	-	569	processed_pseudogene	- && P04764.4 RecName: Full=Alpha-enolase; AltName: Full=2-phospho-D-glycerate hydro-lyase; AltName: Full=Enolase 1; AltName: Full=Non-neural enolase; Short=NNE && -	-
ENSMUSG00000111897	10.5999	2.8	3.94081	1.05813	0	0	5.78022	0.352708	3.93752	0.0184067	1	Gm19810	10	79724546	79724796	+	251	processed_pseudogene	- && - && -	-
ENSMUSG00000096768	86.5655	24.2666	47.2897	5.29063	5.34939	0	52.7073	3.54667	3.90198	8.95509e-09	5.18679e-06	Gm47283	Y	90796007	90827734	+	4501	lncRNA	- && - && -	-
ENSMUSG00000112558	4.41661	10.2666	1.9704	0	1.06988	0	5.55122	0.356626	3.87648	0.0220786	1	Gm32364	10	67411713	67422217	+	485	lncRNA	- && - && -	-
ENSMUSG00000095912	15.8998	18.6666	10.8372	1.05813	2.13975	0	15.1345	1.06596	3.83891	0.000466367	1	Gm3317	14	17300540	17305238	-	519	protein_coding	- && - && PF04822:Takusan	-
ENSMUSG00000048484	2.64997	10.2666	2.95561	0	0	1.04089	5.29074	0.346965	3.80524	0.0260962	1	Gm7461	8	4727539	4728365	-	827	TEC	- && - && -	-
ENSMUSG00000110409	4.41661	9.33332	1.9704	0	0	1.04089	5.24011	0.346965	3.79341	0.0265089	1	Gm9908	8	45387749	45388196	-	448	lncRNA	- && - && -	-
ENSMUSG00000037005	6.18325	4.66666	3.94081	0	1.06988	0	4.93024	0.356626	3.70555	0.0287956	1	Xpnpep2	X	47197602	47225858	+	4878	protein_coding	- && - && PF00557:Metallopeptidase family M24|PF16188:C-terminal region of peptidase_M24|PF16189:Creatinase/Prolidase N-terminal domain|PF01321:Creatinase/Prolidase N-terminal domain	Peptidase_M24
ENSMUSG00000106680	3.53329	10.2666	11.8224	2.11625	0	0	8.54079	0.705417	3.59598	0.0114186	1	Gm43852	5	32870416	32871332	-	917	TEC	- && - && -	-
ENSMUSG00000113876	12.3665	6.53332	4.92601	1.05813	0	1.04089	7.94195	0.699673	3.50217	0.0127194	1	Gm48042	12	22956039	22956164	-	126	processed_pseudogene	- && Q7SIG6.3 RecName: Full=Arf-GAP with SH3 domain, ANK repeat and PH domain-containing protein 2; AltName: Full=Development and differentiation-enhancing factor 2; AltName: Full=Paxillin-associated protein with ARF GAP activity 3; Short=PAG3; AltName: Full=Pyk2 C-terminus-associated protein; Short=PAP && -	-
ENSMUSG00000118220	3.53329	8.39999	55.1713	3.17438	3.20963	0	22.3682	2.128	3.39443	0.000942761	1	Gm6192	19	7937108	7938472	-	1365	processed_pseudogene	- && - && -	-
ENSMUSG00000084224	5.29993	3.73333	9.85202	2.11625	0	0	6.29509	0.705417	3.15642	0.0363579	1	Gm12337	11	75318579	75318978	+	400	processed_pseudogene	- && - && -	-
ENSMUSG00000004885	30.9163	19.6	3.94081	3.17438	2.13975	1.04089	18.1523	2.11834	3.10621	0.00103806	1	Crabp2	3	87855973	87860683	+	1322	protein_coding	- && P22935.2 RecName: Full=Cellular retinoic acid-binding protein 2; AltName: Full=Cellular retinoic acid-binding protein II; Short=CRABP-II && PF00061:Lipocalin / cytosolic fatty-acid binding protein family	-
ENSMUSG00000069917	39.7495	6.53332	5.91121	1.05813	1.06988	4.16358	17.398	2.09719	3.05231	0.00238391	1	Hba-a2	11	32246489	32247298	+	667	protein_coding	- && P01942.2 RecName: Full=Hemoglobin subunit alpha; AltName: Full=Alpha-globin; AltName: Full=Hemoglobin alpha chain && PF00042:Globin	-
ENSMUSG00000103367	9.71654	7.46665	7.88161	0	1.06988	2.08179	8.35494	1.05056	2.98749	0.0157065	1	Gm38158	1	176663290	176663628	+	339	processed_pseudogene	- && - && -	-
ENSMUSG00000095079	37.0995	16.8	1.9704	4.2325	1.06988	2.08179	18.6233	2.46139	2.92369	0.00265743	1	Igha	12	113218450	113223856	-	2668	IG_C_gene	- && P01878.1 RecName: Full=Ig alpha chain C region && PF07654:Immunoglobulin C1-set domain	C1-set
ENSMUSG00000022651	25.6163	7.46665	4.92601	1.05813	3.20963	1.04089	12.6697	1.76955	2.85002	0.00682435	1	Retnlg	16	48692984	48694859	+	593	protein_coding	- && Q9EP95.1 RecName: Full=Resistin-like alpha; AltName: Full=Cysteine-rich secreted protein A12-gamma; AltName: Full=Cysteine-rich secreted protein FIZZ1; AltName: Full=Hypoxia-induced mitogenic factor; AltName: Full=Parasite-induced macrophage novel gene 1 protein; AltName: Full=RELMalpha; Flags: Precursor && PF06954:Resistin	-
ENSMUSG00000094066	7.06658	9.33332	24.63	3.17438	0	3.12268	13.6766	2.09902	2.69418	0.00638648	1	Fam205a2	4	42522580	42528175	-	3927	protein_coding	- && - && PF14650:FAM75 family|PF15371:Domain of unknown function (DUF4599)	-
ENSMUSG00000001494	7.06658	5.59999	6.89641	2.11625	1.06988	0	6.52099	1.06204	2.62313	0.0453089	1	Sost	11	101853284	101857841	-	2066	protein_coding	- && Q99P68.1 RecName: Full=Sclerostin; Flags: Precursor && PF05463:Sclerostin (SOST)	-
ENSMUSG00000097180	9.71654	4.66666	10.8372	3.17438	1.06988	0	8.40681	1.41475	2.57416	0.0291649	1	2700038G22Rik	5	24055595	24060036	+	1594	lncRNA	- && - && -	-
ENSMUSG00000021678	17.6664	5.59999	7.88161	1.05813	2.13975	2.08179	10.3827	1.75989	2.56453	0.0146141	1	F2rl1	13	95648240	95661735	-	2741	protein_coding	- && - && PF00001:7 transmembrane receptor (rhodopsin family)	7tm_1
ENSMUSG00000118264	30.9163	9.33332	33.4969	4.2325	2.13975	6.24537	24.5821	4.20587	2.54346	0.000507663	1	Rps15-ps3	18	64421206	64424891	+	1258	transcribed_processed_pseudogene	- && - && -	-
ENSMUSG00000118134	3.53329	13.0666	7.88161	0	2.13975	2.08179	8.16052	1.40718	2.53305	0.034227	1	4930549G23Rik	18	67901369	67933041	-	825	lncRNA	- && Q96EE3.3 RecName: Full=Nucleoporin SEH1; AltName: Full=Nup107-160 subcomplex subunit SEH1; AltName: Full=SEC13-like protein && -	-
novel.167	31.7996	15.8666	10.8372	1.05813	2.13975	7.28626	19.5011	3.49471	2.47886	0.00226901	1	-	7	24652949	24653917	-	427	-	- && - && -	-
ENSMUSG00000065126	22.083	12.1333	11.8224	2.11625	4.27951	2.08179	15.3463	2.82585	2.44683	0.00365348	1	Snord104	11	106391819	106391888	+	70	snoRNA	- && - && -	-
ENSMUSG00000118426	12.3665	5.59999	4.92601	1.05813	2.13975	1.04089	7.63084	1.41292	2.44044	0.0381635	1	Gm2102	1	78193369	78194113	-	745	processed_pseudogene	- && - && PF14634:zinc-RING finger domain	-
ENSMUSG00000081262	15.8998	3.73333	14.778	3.17438	3.20963	0	11.4704	2.128	2.43609	0.0184361	1	Gm12261	11	59468818	59469462	-	645	processed_pseudogene	- && B2RPK0.1 PUTATIVE PSEUDOGENE: RecName: Full=Putative high mobility group protein B1-like 1; AltName: Full=High mobility group protein B1 pseudogene 1; AltName: Full=Putative high mobility group protein 1-like 1; Short=HMG-1L1 && PF09011:HMG-box domain	-
ENSMUSG00000102145	7.9499	6.53332	13.7928	1.05813	3.20963	1.04089	9.42535	1.76955	2.41455	0.0230883	1	Gm38056	1	55480063	55485089	+	5027	TEC	- && - && PF00248:Aldo/keto reductase family	Aldo_ket_red
ENSMUSG00000038357	17.6664	8.39999	0.985202	1.05813	1.06988	3.12268	9.01721	1.75023	2.36781	0.044368	1	Camp	9	109676447	109678685	-	758	protein_coding	- && P51437.2 RecName: Full=Cathelicidin antimicrobial peptide; AltName: Full=Cathelin-like protein; Short=CLP; Contains: RecName: Full=Cathelin-related antimicrobial peptide; Short=Cramp; Flags: Precursor && PF00666:Cathelicidin|PF12153:LPS binding domain of CAP18 (C terminal)	-
ENSMUSG00000040966	10.5999	12.1333	9.85202	3.17438	2.13975	1.04089	10.8617	2.11834	2.3609	0.0143629	1	Slc22a2	17	12803019	12847375	+	2483	protein_coding	- && O70577.1 RecName: Full=Solute carrier family 22 member 2; AltName: Full=Organic cation transporter 2 && PF00083:Sugar (and other) transporter	Sugar_tr
ENSMUSG00000079402	0.883322	40.1333	0.985202	3.17438	2.13975	3.12268	14.0006	2.81227	2.315	0.0453803	1	Gm3020	14	18796558	18817743	-	1933	protein_coding	- && - && -	-
ENSMUSG00000033501	22.083	14.9333	6.89641	5.29063	1.06988	3.12268	14.6376	3.16106	2.21379	0.0104379	1	Crygs	16	22623953	22630327	-	875	protein_coding	- && O35486.3 RecName: Full=Beta-crystallin S; AltName: Full=Gamma-S-crystallin; AltName: Full=Gamma-crystallin S && PF00030:Beta/Gamma crystallin	Crystall
ENSMUSG00000006538	15.0165	10.2666	3.94081	2.11625	2.13975	2.08179	9.74131	2.1126	2.21039	0.0302257	1	Ihh	1	74984474	74990831	-	3048	protein_coding	- && - && PF01085:Hedgehog amino-terminal signalling domain|PF01079:Hint module	-
ENSMUSG00000032496	43.2828	10.2666	7.88161	4.2325	3.20963	6.24537	20.477	4.5625	2.16981	0.00660744	1	Ltf	9	110848339	110871835	+	3450	protein_coding	- && - && PF00405:Transferrin	-
ENSMUSG00000096974	15.8998	5.59999	15.7632	5.29063	1.06988	2.08179	12.421	2.8141	2.14145	0.0202295	1	Gm26881	4	43045966	43053254	+	661	lncRNA	- && - && -	-
ENSMUSG00000023987	17.6664	9.33332	13.7928	2.11625	1.06988	6.24537	13.5975	3.14383	2.1084	0.0150234	1	Pgc	17	48037767	48045407	+	1388	protein_coding	- && Q9D7R7.1 RecName: Full=Gastricsin; AltName: Full=Pepsinogen C; Flags: Precursor && PF00026:Eukaryotic aspartyl protease|PF07966:A1 Propeptide	Asp
ENSMUSG00000105977	13.2498	12.1333	5.91121	0	4.27951	3.12268	10.4315	2.4674	2.08377	0.036507	1	Gm43555	3	54964768	54965077	-	310	processed_pseudogene	- && - && -	-
ENSMUSG00000033227	108.649	61.5999	70.9345	24.3369	13.9084	18.7361	80.3943	18.9938	2.08268	5.56589e-08	1.65089e-05	Wnt6	1	74811051	74824481	+	2192	protein_coding	- && P22727.2 RecName: Full=Protein Wnt-6; Flags: Precursor && PF00110:wnt family	wnt
ENSMUSG00000065676	6.18325	8.39999	15.7632	2.11625	2.13975	3.12268	10.1155	2.45956	2.03404	0.0347521	1	Snord42b	11	78073882	78073950	-	69	snoRNA	- && - && -	-
ENSMUSG00000022595	15.8998	11.2	10.8372	3.17438	3.20963	3.12268	12.6457	3.1689	1.99872	0.0172994	1	Lypd2	15	74604096	74606178	-	679	protein_coding	- && - && PF00021:u-PAR/Ly-6 domain	-
ENSMUSG00000020884	21.1997	28	17.7336	6.34875	7.48914	3.12268	22.3111	5.65353	1.98388	0.002318	1	Asgr1	11	69944911	69948720	+	1591	protein_coding	- && P34927.4 RecName: Full=Asialoglycoprotein receptor 1; Short=ASGP-R 1; Short=ASGPR 1; AltName: Full=Hepatic lectin 1; Short=HL-1; Short=mHL-1 && PF03954:Hepatic lectin, N-terminal domain|PF00059:Lectin C-type domain	Lectin_C
ENSMUSG00000114688	9.71654	14	24.63	6.34875	0	6.24537	16.1155	4.19804	1.93326	0.0198819	1	Gm47381	13	91407495	91423073	+	949	lncRNA	- && - && -	-
ENSMUSG00000024650	16.7831	12.1333	10.8372	3.17438	1.06988	6.24537	13.2512	3.49654	1.91946	0.0227048	1	Slc22a6	19	8595403	8605663	+	3983	protein_coding	- && - && PF00083:Sugar (and other) transporter	Sugar_tr
ENSMUSG00000086742	13.2498	20.5333	9.85202	3.17438	4.27951	4.16358	14.545	3.87249	1.91034	0.0152518	1	Gm16201	7	139530309	139558890	+	3469	lncRNA	- && - && -	-
ENSMUSG00000108624	8.83322	9.33332	16.7484	3.17438	4.27951	2.08179	11.6383	3.17856	1.87128	0.03208	1	Gm45091	7	34817469	34819030	-	504	lncRNA	- && - && -	-
ENSMUSG00000087523	11.4832	8.39999	10.8372	2.11625	1.06988	5.20447	10.2401	2.79687	1.86776	0.04596	1	Gm12319	11	70545567	70547319	-	357	lncRNA	- && - && -	-
novel.124	26.4997	11.2	23.6448	6.34875	5.34939	5.20447	20.4482	5.6342	1.86047	0.00588399	1	-	4	42670268	42681684	+	362	-	- && - && -	-
ENSMUSG00000032484	61.8325	11.2	5.91121	2.11625	8.55902	11.4498	26.3146	7.37504	1.83904	0.0207202	1	Ngp	9	110248815	110252080	+	1222	protein_coding	- && O08692.1 RecName: Full=Neutrophilic granule protein; Short=NGP; AltName: Full=Cystatin-like protein; AltName: Full=Myeloid bactenecin protein; AltName: Full=Myeloid secondary granule protein; Flags: Precursor && PF00666:Cathelicidin	-
ENSMUSG00000073787	10.5999	17.7333	8.86682	6.34875	3.20963	1.04089	12.4	3.53309	1.81432	0.0364835	1	Gm10575	7	141041394	141047684	-	3871	lncRNA	- && - && -	-
ENSMUSG00000042269	25.6163	15.8666	16.7484	8.465	4.27951	4.16358	19.4105	5.63603	1.78664	0.00837435	1	Cibar2	8	120893136	120904205	-	1395	protein_coding	- && Q3V2J0.2 RecName: Full=Protein FAM92B && PF06730:FAM92 protein	-
ENSMUSG00000047182	12.3665	11.2	12.8076	5.29063	2.13975	3.12268	12.1247	3.51769	1.78447	0.0323916	1	Irs3	5	137641293	137643976	-	2338	protein_coding	- && Q6P4Y6.1 RecName: Full=Insulin receptor substrate 1; Short=IRS-1 && PF02174:PTB domain (IRS-1 type)	-
ENSMUSG00000032092	16.7831	31.7333	16.7484	3.17438	6.41926	9.36805	21.7549	6.32056	1.78159	0.00699355	1	Mpzl2	9	44951097	44965313	+	6968	protein_coding	- && O70255.1 RecName: Full=Myelin protein zero-like protein 2; AltName: Full=Epithelial V-like antigen 1; Flags: Precursor && PF07686:Immunoglobulin V-set domain	V-set
novel.204	22.9664	14.9333	26.6004	6.34875	9.6289	3.12268	21.5	6.36678	1.75795	0.00715849	1	-	X	168857120	168859033	+	323	-	- && P50427.1 RecName: Full=Steryl-sulfatase; AltName: Full=Arylsulfatase C; Short=ASC; AltName: Full=Steroid sulfatase; AltName: Full=Steryl-sulfate sulfohydrolase; Flags: Precursor && -	-
ENSMUSG00000091955	21.1997	23.3333	4.92601	2.11625	2.13975	10.4089	16.4863	4.88832	1.75293	0.0353615	1	Gm9844	7	24561638	24562122	+	485	protein_coding	- && Q6ZWY8.3 RecName: Full=Thymosin beta-10 >P63312.2 RecName: Full=Thymosin beta-10 >P63313.2 RecName: Full=Thymosin beta-10 >P63314.2 RecName: Full=Thymosin beta-10 && -	-
ENSMUSG00000085767	26.4997	28.9333	22.6596	5.29063	10.6988	7.28626	26.0309	7.75855	1.74827	0.00244294	1	Gm13563	2	26271538	26279030	+	1678	lncRNA	- && A2AIW0.1 RecName: Full=Serologically defined colon cancer antigen 3 homolog && -	-
ENSMUSG00000087038	32.6829	23.3333	10.8372	4.2325	9.6289	6.24537	22.2845	6.70225	1.73867	0.00872325	1	2900079G21Rik	9	112063345	112177993	+	6718	lncRNA	- && - && -	-
ENSMUSG00000023046	528.227	481.599	431.518	168.242	140.154	123.866	480.448	144.087	1.73823	1.1325e-22	8.1993e-19	Igfbp6	15	102052797	102057946	+	1112	protein_coding	- && P47880.2 RecName: Full=Insulin-like growth factor-binding protein 6; Short=IBP-6; Short=IGF-binding protein 6; Short=IGFBP-6; Flags: Precursor && PF00086:Thyroglobulin type-1 repeat|PF00219:Insulin-like growth factor binding protein	-
ENSMUSG00002075524	16.7831	15.8666	15.7632	5.29063	3.20963	6.24537	16.1377	4.91521	1.71352	0.0165057	1	-	9	56130999	56131055	-	57	miRNA	- && - && -	-
ENSMUSG00000108452	29.1496	24.2666	11.8224	3.17438	6.41926	10.4089	21.7462	6.66753	1.70702	0.0103746	1	4930413G21Rik	7	122568281	122569273	-	993	TEC	- && - && -	-
ENSMUSG00000025432	37.9828	12.1333	14.778	9.52313	4.27951	6.24537	21.6314	6.68267	1.69837	0.0130564	1	Avil	10	126836578	126856863	+	3398	protein_coding	- && - && PF00626:Gelsolin repeat|PF02209:Villin headpiece domain	-
ENSMUSG00000118642	354.212	242.666	98.5202	66.6619	51.3541	98.885	231.8	72.3003	1.68103	0.00356087	0.0202201	AY036118	17	40158994	40159718	-	714	pseudogene	- && - && -	-
ENSMUSG00000028040	11.4832	17.7333	7.88161	4.2325	2.13975	5.20447	12.366	3.85891	1.67923	0.0433771	1	Efna4	3	89240697	89245335	-	1599	protein_coding	- && O08542.2 RecName: Full=Ephrin-A4; AltName: Full=EPH-related receptor tyrosine kinase ligand 4; Short=LERK-4; Flags: Precursor && -	-
ENSMUSG00000060019	78.6156	28	87.683	37.0344	10.6988	13.5316	64.7662	20.4216	1.66482	0.000739159	0.00698631	Gm10073	8	107299641	107299982	-	342	processed_pseudogene	- && - && PF00428:60s Acidic ribosomal protein	-
ENSMUSG00000043243	32.6829	28	30.5413	13.7556	5.34939	10.4089	30.408	9.83799	1.62708	0.00229363	1	Niban3	8	72050292	72060580	+	3560	protein_coding	- && - && -	-
ENSMUSG00000103034	20.3164	24.2666	16.7484	4.2325	4.27951	11.4498	20.4438	6.65395	1.61693	0.0135409	1	Gm8797	3	5815866	5816355	+	490	protein_coding	- && P0CG62.1 RecName: Full=Polyubiquitin-B; Contains: RecName: Full=Ubiquitin; Flags: Precursor >P0CG49.1 RecName: Full=Polyubiquitin-B; Contains: RecName: Full=Ubiquitin; Flags: Precursor >P0CG51.1 RecName: Full=Polyubiquitin-B; Contains: RecName: Full=Ubiquitin; Flags: Precursor && -	-
ENSMUSG00000108772	19.4331	10.2666	20.6892	6.34875	5.34939	5.20447	16.7963	5.6342	1.57561	0.0242304	1	Gm6063	6	71618596	71619080	-	485	processed_pseudogene	- && P17742.2 RecName: Full=Peptidyl-prolyl cis-trans isomerase A; Short=PPIase A; AltName: Full=Cyclophilin A; AltName: Full=Cyclosporin A-binding protein; AltName: Full=Rotamase A; AltName: Full=SP18; Contains: RecName: Full=Peptidyl-prolyl cis-trans isomerase A, N-terminally processed && PF00160:Cyclophilin type peptidyl-prolyl cis-trans isomerase/CLD	Pro_isomerase
novel.144	17.6664	13.0666	21.6744	5.29063	1.06988	11.4498	17.4692	5.93678	1.55153	0.03577	1	-	5	146167593	146167972	+	380	-	- && - && -	-
ENSMUSG00000087590	128.082	97.0665	73.8901	44.4413	22.4674	35.3904	99.6794	34.0997	1.54872	4.03021e-06	0.000250461	Epb41l4aos	18	33927945	33929039	+	430	lncRNA	- && - && -	-
ENSMUSG00000113753	13.2498	6.53332	26.6004	6.34875	5.34939	4.16358	15.4612	5.28724	1.54487	0.0439711	1	Gm5791	13	64772086	64772574	-	489	processed_pseudogene	- && P17742.2 RecName: Full=Peptidyl-prolyl cis-trans isomerase A; Short=PPIase A; AltName: Full=Cyclophilin A; AltName: Full=Cyclosporin A-binding protein; AltName: Full=Rotamase A; AltName: Full=SP18; Contains: RecName: Full=Peptidyl-prolyl cis-trans isomerase A, N-terminally processed && PF00160:Cyclophilin type peptidyl-prolyl cis-trans isomerase/CLD	Pro_isomerase
ENSMUSG00000020660	21.1997	17.7333	9.85202	7.40688	1.06988	8.32716	16.2617	5.6013	1.53747	0.041586	1	Pomc	12	4004951	4010642	+	1318	protein_coding	- && P01193.1 RecName: Full=Pro-opiomelanocortin; Short=POMC; AltName: Full=Corticotropin-lipotropin; Contains: RecName: Full=NPP; Contains: RecName: Full=Melanotropin gamma; AltName: Full=Gamma-MSH; Contains: RecName: Full=Corticotropin; AltName: Full=Adrenocorticotropic hormone; Short=ACTH; Contains: RecName: Full=Melanotropin alpha; AltName: Full=Alpha-MSH; Contains: RecName: Full=Corticotropi…	-
ENSMUSG00000079553	30.0329	29.8666	21.6744	6.34875	11.7686	10.4089	27.1913	9.50878	1.5176	0.00561422	1	Kifc1	17	34094633	34109635	-	3414	protein_coding	- && - && PF00225:Kinesin motor domain	Kinesin
ENSMUSG00000049241	21.1997	12.1333	8.86682	6.34875	5.34939	3.12268	14.0666	4.94027	1.51538	0.048216	1	Hcar1	5	124014799	124018083	-	3285	protein_coding	- && Q8C131.1 RecName: Full=Hydroxycarboxylic acid receptor 1; AltName: Full=G-protein coupled receptor 81 && -	-
ENSMUSG00000085028	36.2162	32.6666	36.4525	16.93	11.7686	8.32716	35.1118	12.3419	1.50935	0.00186381	1	Slc2a4rg-ps	2	181026043	181029379	+	2976	transcribed_unitary_pseudogene	- && Q9NR83.4 RecName: Full=SLC2A4 regulator; AltName: Full=GLUT4 enhancer factor; Short=GEF; AltName: Full=Huntington disease gene regulatory region-binding protein 1; Short=HDBP-1 && -	-
ENSMUSG00000020377	24.733	13.0666	9.85202	6.34875	7.48914	3.12268	15.8839	5.65353	1.49695	0.0413306	1	Ltc4s	11	50127288	50129443	-	1014	protein_coding	- && Q60860.1 RecName: Full=Leukotriene C4 synthase; Short=LTC4 synthase; AltName: Full=Leukotriene-C(4) synthase && -	-
ENSMUSG00000071497	65.3658	42.9333	38.4229	13.7556	16.0482	22.8997	48.9073	17.5678	1.47844	0.000581407	0.00591622	Nutf2-ps1	19	53576599	53577499	-	901	protein_coding	- && - && PF02136:Nuclear transport factor 2 (NTF2) domain	-
ENSMUSG00000046229	926.605	496.532	395.066	211.625	195.788	247.733	606.068	218.382	1.47331	1.41576e-09	1.57694e-06	Scand1	2	156153766	156154667	-	803	protein_coding	- && Q32PG5.1 RecName: Full=SCAN domain-containing protein 1 && -	-
ENSMUSG00000042540	18.5498	12.1333	21.6744	4.2325	5.34939	9.36805	17.4525	6.31665	1.46331	0.0317015	1	Acot5	12	84116099	84122794	+	1519	protein_coding	- && - && PF08840:BAAT / Acyl-CoA thioester hydrolase C terminal|PF04775:Acyl-CoA thioester hydrolase/BAAT N-terminal region	-
ENSMUSG00000044034	57.4159	35.4666	37.4377	14.8138	13.9084	18.7361	43.4401	15.8194	1.45865	0.000984977	0.00847443	Npb	11	120499303	120499919	+	542	protein_coding	- && Q8K4P1.1 RecName: Full=Neuropeptide B; AltName: Full=Preproprotein L7; Short=mPPL7; Contains: RecName: Full=Neuropeptide B-29; Short=NPB29; AltName: Full=L7C; Flags: Precursor && PF15180:Neuropeptides B and W	-
ENSMUSG00000031594	11.4832	13.0666	18.7188	5.29063	6.41926	4.16358	14.4229	5.29116	1.44524	0.047406	1	Fgl1	8	41644471	41668193	-	4434	protein_coding	- && - && PF00147:Fibrinogen beta and gamma chains, C-terminal globular domain	Fibrinogen_C
ENSMUSG00000019539	302.979	239.866	117.239	88.8825	77.0312	77.0262	220.028	80.98	1.44376	5.74036e-07	7.5564e-05	Rcn3	7	44732337	44741645	-	1717	protein_coding	- && Q8BH97.1 RecName: Full=Reticulocalbin-3; Flags: Precursor && PF13499:EF-hand domain pair	-
novel.216	79.499	54.1332	40.3933	20.1044	20.3277	23.9406	58.0085	21.4575	1.43722	0.000314264	0.00388935	-	X	168960833	169015066	-	843	-	- && P50427.1 RecName: Full=Steryl-sulfatase; AltName: Full=Arylsulfatase C; Short=ASC; AltName: Full=Steroid sulfatase; AltName: Full=Steryl-sulfate sulfohydrolase; Flags: Precursor && PF00884:Sulfatase	Sulfatase
ENSMUSG00000037206	605.959	547.866	321.176	209.509	146.573	190.484	491.667	182.189	1.43289	1.17408e-10	2.42866e-07	Islr	9	58063551	58111589	-	2686	protein_coding	- && Q6GU68.1 RecName: Full=Immunoglobulin superfamily containing leucine-rich repeat protein; Flags: Precursor && PF13855:Leucine rich repeat	-
ENSMUSG00000097296	11.4832	14	22.6596	5.29063	6.41926	6.24537	16.0476	5.98509	1.41926	0.0416648	1	Gm26532	8	84935549	84936238	+	690	lncRNA	- && - && -	-
ENSMUSG00000063704	40.6328	34.5333	25.6152	9.52313	12.8385	15.6134	33.5938	12.6584	1.4096	0.00410519	1	Mapk15	15	75865618	75871003	+	2563	protein_coding	- && - && PF00069:Protein kinase domain	Pkinase
ENSMUSG00000044320	49.466	35.4666	43.3489	10.5813	13.9084	23.9406	42.7605	16.1434	1.40422	0.00185375	0.0131709	1700001O22Rik	2	30684781	30693673	-	2788	protein_coding	- && Q5SZB4.1 RecName: Full=Uncharacterized protein C9orf50 && -	-
ENSMUSG00000025784	199.631	92.3998	99.5054	63.4875	22.4674	62.4537	130.512	49.4695	1.40014	0.000142389	0.00232184	Clec3b	9	122980011	122986497	+	992	protein_coding	- && P43025.2 RecName: Full=Tetranectin; Short=TN; AltName: Full=C-type lectin domain family 3 member B; AltName: Full=Plasminogen kringle 4-binding protein; Flags: Precursor && PF00059:Lectin C-type domain	Lectin_C
ENSMUSG00000117322	26.4997	22.4	11.8224	8.465	5.34939	9.36805	20.2407	7.72748	1.39141	0.0283387	1	6330415G19Rik	17	23769773	23784265	+	1624	lncRNA	- && - && -	-
ENSMUSG00000029343	80.3823	42.9333	72.9049	28.5694	14.9783	31.2268	65.4068	24.9248	1.3909	0.000423416	0.00477623	Crybb1	5	112403681	112417451	+	985	protein_coding	- && Q9WVJ5.3 RecName: Full=Beta-crystallin B1; AltName: Full=Beta-B1 crystallin; Contains: RecName: Full=Beta-crystallin B1B && PF00030:Beta/Gamma crystallin	Crystall
ENSMUSG00000067847	501.727	266.933	278.812	139.673	85.5902	174.87	349.157	133.378	1.38863	1.96512e-07	3.51295e-05	Romo1	2	155985959	155987717	+	747	protein_coding	- && P60602.1 RecName: Full=Reactive oxygen species modulator 1; Short=ROS modulator 1; AltName: Full=Epididymis tissue protein Li 175; AltName: Full=Glyrichin; AltName: Full=Mitochondrial targeting GxxxG motif protein; Short=MTGM; AltName: Full=Protein MGR2 homolog >P60603.1 RecName: Full=Reactive oxygen species modulator 1; Short=ROS modulator 1; AltName: Full=Protein MGR2 homolog >Q3SZV8.1 Rec…	-
ENSMUSG00000034686	285.313	169.866	159.603	87.8244	62.0529	86.3943	204.927	78.7572	1.38075	1.82664e-07	3.30622e-05	Prr7	13	55612080	55620967	+	1359	protein_coding	- && Q3V0I2.1 RecName: Full=Proline-rich protein 7; AltName: Full=Synaptic proline-rich membrane protein && -	-
ENSMUSG00000029699	23.8497	15.8666	14.778	7.40688	4.27951	9.36805	18.1648	7.01815	1.37258	0.036342	1	Ssc4d	5	135989065	136003385	-	2976	protein_coding	- && A1L0T3.2 RecName: Full=Scavenger receptor cysteine-rich domain-containing group B protein; AltName: Full=Four scavenger receptor cysteine-rich domains-containing protein; AltName: Full=S4D-SRCRB; Flags: Precursor && PF00530:Scavenger receptor cysteine-rich domain	SRCR
ENSMUSG00000024610	399.262	357.466	214.774	146.021	56.7035	172.789	323.834	125.171	1.37132	0.00833521	0.0367185	Cd74	18	60936920	60945724	+	1679	protein_coding	- && P04441.3 RecName: Full=H-2 class II histocompatibility antigen gamma chain; AltName: Full=Ia antigen-associated invariant chain; Short=Ii; AltName: Full=MHC class II-associated invariant chain; AltName: CD_antigen=CD74 && PF08831:Class II MHC-associated invariant chain trimerisation domain|PF09307:CLIP, MHC2 interacting	-
ENSMUSG00000086859	184.614	101.733	149.751	66.6619	33.1662	68.699	145.366	56.1757	1.37132	7.94923e-06	0.000372508	Snhg20	11	116966834	116969781	+	2795	lncRNA	- && - && -	-
ENSMUSG00000044927	425.761	238	185.218	132.266	83.4504	113.458	282.993	109.725	1.36804	6.92607e-07	8.4532e-05	H1f10	6	87957403	87958619	-	1217	protein_coding	- && - && PF00538:linker histone H1 and H5 family	-
ENSMUSG00000048387	51.2327	28.9333	28.5709	7.40688	17.118	17.6952	36.2456	14.0734	1.3672	0.00638893	1	Osr1	12	9620116	9631500	+	2066	protein_coding	- && Q9WVG7.1 RecName: Full=Protein odd-skipped-related 1 >B0K011.1 RecName: Full=Protein odd-skipped-related 1 && -	-
ENSMUSG00000106237	25.6163	18.6666	20.6892	5.29063	8.55902	11.4498	21.6574	8.43316	1.36075	0.0228305	1	Gm8066	5	137508515	137515763	+	485	lncRNA	- && - && -	-
ENSMUSG00000050212	79.499	60.6666	40.3933	28.5694	14.9783	27.0633	60.1863	23.537	1.35603	0.000755052	0.00706732	Eva1b	4	126041537	126043668	+	1942	protein_coding	- && - && -	-
ENSMUSG00000042737	231.43	135.333	180.292	71.9525	49.2144	92.6396	182.352	71.2688	1.35513	7.68818e-07	9.0508e-05	Dpm3	3	89166665	89174386	+	919	protein_coding	- && Q9D1Q4.1 RecName: Full=Dolichol-phosphate mannosyltransferase subunit 3; AltName: Full=Dolichol-phosphate mannose synthase subunit 3; Short=DPM synthase subunit 3; AltName: Full=Dolichyl-phosphate beta-D-mannosyltransferase subunit 3; AltName: Full=Mannose-P-dolichol synthase subunit 3; Short=MPD synthase subunit 3 && -	-
ENSMUSG00000038086	22.083	30.7999	8.86682	7.40688	4.27951	12.4907	20.5833	8.05904	1.35309	0.043622	1	Hspb2	9	50662378	50663654	-	834	protein_coding	- && - && -	-
ENSMUSG00000024552	32.6829	25.2	16.7484	5.29063	6.41926	17.6952	24.8771	9.8017	1.34352	0.0263794	1	Slc14a2	18	78189363	78640157	-	5171	protein_coding	- && - && PF03253:Urea transporter	-
novel.206	1100.62	689.732	619.692	344.949	296.356	313.309	803.348	318.205	1.33673	7.08103e-12	2.05067e-08	-	X	169097596	169105756	+	3532	-	- && Q02040.2 RecName: Full=A-kinase anchor protein 17A; Short=AKAP-17A; AltName: Full=721P; AltName: Full=B-lymphocyte antigen; AltName: Full=Protein XE7; AltName: Full=Protein kinase A-anchoring protein 17A; Short=PRKA17A; AltName: Full=Splicing factor, arginine/serine-rich 17A && -	-
ENSMUSG00000090137	143.981	95.1998	101.476	34.9181	47.0746	53.0856	113.552	45.0261	1.33558	6.26802e-06	0.000325308	Uba52	8	70960913	70963451	-	1498	protein_coding	- && - && PF00240:Ubiquitin family|PF01020:Ribosomal L40e family	ubiquitin
ENSMUSG00000085042	57.4159	40.1333	18.7188	12.6975	13.9084	19.777	38.756	15.461	1.32882	0.0081127	0.0360417	Abhd11os	5	135040968	135042107	-	701	transcribed_unitary_pseudogene	- && - && -	-
ENSMUSG00000067288	891.272	539.466	400.977	216.916	160.482	354.945	610.572	244.114	1.32266	0.00483638	0.0251187	Rps28	17	34038001	34043536	-	1719	protein_coding	- && Q6QAT1.2 RecName: Full=40S ribosomal protein S28 >P62859.1 RecName: Full=40S ribosomal protein S28 >P62857.1 RecName: Full=40S ribosomal protein S28 >P62858.1 RecName: Full=40S ribosomal protein S28 >Q56JX6.1 RecName: Full=40S ribosomal protein S28 && -	-
ENSMUSG00000039481	141.332	85.8665	91.6238	43.3831	35.3059	48.922	106.274	42.537	1.3221	1.65235e-05	0.000593834	Nrtn	17	57058325	57064530	-	1023	protein_coding	- && P97463.1 RecName: Full=Neurturin; Flags: Precursor && -	-
ENSMUSG00000046714	65.3658	42.9333	24.63	26.4531	8.55902	18.7361	44.3097	17.9161	1.30865	0.00796517	0.0355097	Foxc2	8	121842910	121845634	+	2725	protein_coding	- && - && PF00250:Forkhead domain	Fork_head
ENSMUSG00000032773	36.2162	34.5333	30.5413	11.6394	16.0482	13.5316	33.7636	13.7397	1.29845	0.00566391	1	Chrm1	19	8641153	8660951	+	6487	protein_coding	- && P12657.2 RecName: Full=Muscarinic acetylcholine receptor M1 && -	-
ENSMUSG00000116757	69.7824	35.4666	34.4821	13.7556	20.3277	22.8997	46.577	18.9943	1.29676	0.00372278	0.0208856	Gm4786	17	16777508	16778305	+	798	processed_pseudogene	- && P12970.2 RecName: Full=60S ribosomal protein L7a; AltName: Full=Surfeit locus protein 3 && -	-
ENSMUSG00000094392	37.9828	16.8	11.8224	5.29063	8.55902	13.5316	22.2017	9.12709	1.28594	0.0461619	1	Gm3788	3	86579340	86579475	-	136	processed_pseudogene	- && Q6ZWY8.3 RecName: Full=Thymosin beta-10 >P63312.2 RecName: Full=Thymosin beta-10 >P63313.2 RecName: Full=Thymosin beta-10 >P63314.2 RecName: Full=Thymosin beta-10 && -	-
ENSMUSG00000079017	30.9163	21.4666	11.8224	7.40688	10.6988	8.32716	21.4018	8.81094	1.28531	0.0365852	1	Ifi27l2a	12	103408426	103409939	-	463	protein_coding	- && Q8R412.1 RecName: Full=Interferon alpha-inducible protein 27-like protein 2A; AltName: Full=Interferon-stimulated gene 12 protein; Short=ISG12; Flags: Precursor && PF06140:Interferon-induced 6-16 family	-
ENSMUSG00000095789	19.4331	15.8666	20.6892	11.6394	6.41926	5.20447	18.663	7.75437	1.26742	0.0456755	1	Nupr1l	5	129937381	129942630	+	2489	protein_coding	- && Q497P3.1 RecName: Full=Nuclear protein 2; AltName: Full=Nuclear transcriptional regulator 1-like protein; AltName: Full=Nuclear transcriptional regulator protein 2 && PF10195:DNA-binding nuclear phosphoprotein p8	-
ENSMUSG00000020219	781.74	527.332	389.155	205.276	189.368	313.309	566.076	235.985	1.26269	7.889e-08	1.81322e-05	Timm13	10	80735284	80736803	-	1371	protein_coding	- && - && -	-
ENSMUSG00000039278	18001.2	11535	9900.29	5587.96	4641.13	6213.1	13145.5	5480.73	1.26217	1.91654e-12	9.25052e-09	Pcsk1n	X	7786061	7790649	+	2193	protein_coding	- && Q9QXV0.2 RecName: Full=ProSAAS; AltName: Full=IA-4; AltName: Full=Proprotein convertase subtilisin/kexin type 1 inhibitor; Short=Proprotein convertase 1 inhibitor; AltName: Full=pro-SAAS; Contains: RecName: Full=KEP; Contains: RecName: Full=Big SAAS; Short=b-SAAS; Contains: RecName: Full=Little SAAS; Short=l-SAAS; Contains: RecName: Full=Big PEN-LEN; Short=b-PEN-LEN; AltName: Full=SAAS CT(1-…	-
ENSMUSG00000087595	21.1997	14	22.6596	10.5813	6.41926	7.28626	19.2864	8.09559	1.25183	0.0435582	1	1810012K08Rik	2	26028558	26029555	+	574	lncRNA	- && H0YL14.2 RecName: Full=Protein C9orf69; AltName: Full=Herpes virus UL25-binding protein && -	-
ENSMUSG00000060586	124.548	94.2665	117.239	53.9644	35.3059	52.0447	112.018	47.105	1.24931	1.15574e-05	0.000467462	H2-Eb1	17	34524841	34535648	+	1944	protein_coding	- && P04230.1 RecName: Full=H-2 class II histocompatibility antigen, E-B beta chain; Flags: Precursor && -	-
ENSMUSG00000100215	93.6321	52.2666	117.239	33.86	36.3758	40.5949	87.7126	36.9436	1.2462	0.000302976	0.00380104	Gm8292	1	55374560	55374955	+	396	processed_pseudogene	- && - && PF01282:Ribosomal protein S24e	Ribosomal_S24e
ENSMUSG00000075589	50.3493	31.7333	32.5117	20.1044	13.9084	14.5725	38.1981	16.1951	1.24026	0.00647152	0.0306936	Gm11536	11	96227125	96232934	-	535	lncRNA	- && - && -	-
ENSMUSG00000051243	66.2491	65.3332	49.2601	34.9181	13.9084	28.1042	60.2808	25.6436	1.23322	0.00153403	0.0115152	Islr2	9	58103580	58111602	-	5921	protein_coding	- && Q5RKR3.1 RecName: Full=Immunoglobulin superfamily containing leucine-rich repeat protein 2; AltName: Full=Leucine-rich repeat domain and immunoglobulin domain-containing axon extension protein; Flags: Precursor && PF13895:Immunoglobulin domain|PF13855:Leucine rich repeat	-
ENSMUSG00000023886	282.663	325.733	187.188	151.312	116.617	72.8626	265.195	113.597	1.22438	2.79647e-06	0.000202464	Smoc2	17	14499768	14625052	+	6951	protein_coding	- && Q8CD91.1 RecName: Full=SPARC-related modular calcium-binding protein 2; AltName: Full=Secreted modular calcium-binding protein 2; Short=SMOC-2; Flags: Precursor && PF07648:Kazal-type serine protease inhibitor domain|PF10591:Secreted protein acidic and rich in cysteine Ca binding region|PF16597:Thyroglobulin_1 repeat associated disordered domain|PF00086:Thyroglobulin type-1 repeat	-
ENSMUSG00000073079	105.115	80.2665	56.1565	33.86	9.6289	60.3719	80.5128	34.6203	1.21704	0.00607724	0.0293889	Srp54a	12	55127047	55162152	+	5325	protein_coding	- && P14576.2 RecName: Full=Signal recognition particle 54 kDa protein; Short=SRP54 && -	-
ENSMUSG00000051811	45.0494	51.3332	35.4673	19.0463	7.48914	30.1859	43.95	18.9071	1.21529	0.00954877	0.0403187	Cox6b2	7	4754791	4756093	-	1108	protein_coding	- && Q80ZN9.1 RecName: Full=Cytochrome c oxidase subunit 6B2; AltName: Full=Cytochrome c oxidase subunit VIb isoform 2; Short=COX VIb-2; AltName: Full=Cytochrome c oxidase subunit VIb, testis-specific isoform && -	-
ENSMUSG00000031861	20.3164	26.1333	29.5561	7.40688	12.8385	12.4907	25.3352	10.912	1.2132	0.0251409	1	Lpar2	8	70275079	70283752	+	6317	protein_coding	- && Q9HBW0.2 RecName: Full=Lysophosphatidic acid receptor 2; Short=LPA receptor 2; Short=LPA-2; AltName: Full=Lysophosphatidic acid receptor Edg-4 && -	-
ENSMUSG00000037843	2338.15	1444.8	1117.22	599.957	659.044	858.738	1633.39	705.913	1.21039	0.000743625	0.00702393	Vstm2l	2	157756573	157786639	+	1363	protein_coding	- && Q96N03.1 RecName: Full=V-set and transmembrane domain-containing protein 2-like protein; Flags: Precursor && -	-
ENSMUSG00000036856	177.548	148.4	124.135	82.5338	38.5156	73.9035	150.028	64.9843	1.20732	2.12189e-05	0.000692619	Wnt4	4	137004800	137027037	+	4194	protein_coding	- && P22724.1 RecName: Full=Protein Wnt-4; Flags: Precursor && PF00110:wnt family	wnt
ENSMUSG00000002083	75.0824	57.8666	51.2305	21.1625	17.118	41.6358	61.3931	26.6388	1.20408	0.00228027	0.0151197	Bbc3	7	16042318	16052130	+	2124	protein_coding	- && - && -	-
ENSMUSG00000067203	49.466	39.1999	39.4081	15.8719	18.1879	21.8588	42.6913	18.6395	1.19623	0.00415501	0.0225589	H2-K2	17	34193633	34197801	-	1713	transcribed_unprocessed_pseudogene	- && P16391.2 RecName: Full=RT1 class I histocompatibility antigen, AA alpha chain; Flags: Precursor && PF00129:Class I Histocompatibility antigen, domains alpha 1 and 2	MHC_I
novel.218	336.546	283.733	181.277	111.103	119.826	119.703	267.185	116.877	1.19432	2.47088e-07	4.19321e-05	-	X	169090270	169098483	-	2911	-	- && O95671.3 RecName: Full=N-acetylserotonin O-methyltransferase-like protein; Short=ASMTL && PF02545:Maf-like protein	Maf
ENSMUSG00000043099	113.949	90.5332	62.0677	37.0344	20.3277	59.331	88.8498	38.8977	1.19177	0.00127948	0.0101517	Hic1	11	75055391	75060345	-	3765	protein_coding	- && Q9R1Y5.4 RecName: Full=Hypermethylated in cancer 1 protein; Short=Hic-1 && PF00651:BTB/POZ domain	BTB
ENSMUSG00000035262	44.1661	25.2	14.778	12.6975	11.7686	12.4907	28.048	12.319	1.19162	0.0305856	1	Amh	10	80641077	80643482	+	1670	protein_coding	- && - && PF04709:Anti-Mullerian hormone, N terminal region|PF00019:Transforming growth factor beta like domain	-
ENSMUSG00000104960	200.514	123.2	98.5202	55.0225	50.2842	80.1489	140.745	61.8185	1.18823	8.72742e-05	0.00174068	Snhg8	3	123301201	123302053	-	853	lncRNA	- && - && -	-
ENSMUSG00000098051	45.9327	24.2666	25.6152	13.7556	13.9084	14.5725	31.9382	14.0789	1.18477	0.0168628	1	Gm27032	2	180535898	180537013	+	1116	lncRNA	- && - && -	-
ENSMUSG00000059159	62.7159	24.2666	49.2601	26.4531	16.0482	17.6952	45.4142	20.0655	1.17956	0.00954074	0.0403122	Gm8129	6	52323715	52323927	-	213	processed_pseudogene	- && Q9JJI8.3 RecName: Full=60S ribosomal protein L38 && -	-
ENSMUSG00000040680	42.3995	42.9333	36.4525	13.7556	17.118	22.8997	40.5951	17.9244	1.1792	0.00598393	0.0291154	Kremen2	17	23960171	23964807	-	2123	protein_coding	- && - && -	-
ENSMUSG00000001025	525.577	377.066	265.019	244.427	126.246	145.725	389.221	172.133	1.17796	4.5468e-06	0.000267633	S100a6	3	90520189	90531488	+	1367	protein_coding	- && P14069.3 RecName: Full=Protein S100-A6; AltName: Full=5B10; AltName: Full=Calcyclin; AltName: Full=Prolactin receptor-associated protein; AltName: Full=S100 calcium-binding protein A6 && -	-
ENSMUSG00000025739	124.548	72.7999	73.8901	41.2669	27.8168	51.0038	90.4128	40.0292	1.1764	0.000500995	0.0053107	Gng13	17	25936145	25938380	+	773	protein_coding	- && Q9JMF3.1 RecName: Full=Guanine nucleotide-binding protein G(I)/G(S)/G(O) subunit gamma-13; Flags: Precursor && PF00631:GGL domain	-
ENSMUSG00000075227	548.543	364.933	420.681	193.637	193.648	207.138	444.719	198.141	1.16696	1.98515e-10	3.19388e-07	Znhit2	19	6111222	6112502	+	1281	protein_coding	- && - && PF04438:HIT zinc finger	-
ENSMUSG00000056071	113.949	19.6	17.7336	15.8719	25.6771	26.0224	50.4274	22.5238	1.16666	0.045178	0.123058	S100a9	3	90599939	90603028	-	522	protein_coding	- && P31725.3 RecName: Full=Protein S100-A9; AltName: Full=Calgranulin-B; AltName: Full=Leukocyte L1 complex heavy chain; AltName: Full=Migration inhibitory factor-related protein 14; Short=MRP-14; Short=p14; AltName: Full=S100 calcium-binding protein A9 && PF01023:S-100/ICaBP type calcium binding domain	-
ENSMUSG00000029725	265.88	140.933	179.307	70.8944	79.1709	111.376	195.373	87.147	1.16527	1.36646e-05	0.000529048	Ppp1r35	5	137777111	137778372	+	1085	protein_coding	- && Q9D8C8.1 RecName: Full=Protein phosphatase 1 regulatory subunit 35 && PF15503:Protein phosphatase 1 regulatory subunit 35 C-terminus	-
ENSMUSG00000036731	186.381	164.266	117.239	53.9644	55.6336	99.9259	155.962	69.8413	1.15926	4.46965e-05	0.00113346	Cysrt1	2	25128830	25132464	-	1330	protein_coding	- && Q9D1E4.1 RecName: Full=Cysteine-rich tail protein 1 && PF10631:Protein of unknown function (DUF2477)	-
ENSMUSG00000039323	787.04	456.399	472.897	265.589	198.997	304.982	572.112	256.523	1.15761	8.35598e-08	1.87783e-05	Igfbp2	1	72863662	72891633	+	1847	protein_coding	- && - && PF00219:Insulin-like growth factor binding protein|PF00086:Thyroglobulin type-1 repeat	-
ENSMUSG00000069011	24.733	22.4	82.757	23.2788	17.118	17.6952	43.2966	19.364	1.15659	0.0258117	0.0825609	Gm10254	3	54717805	54718671	-	867	processed_pseudogene	- && P62997.1 RecName: Full=Transformer-2 protein homolog beta; Short=TRA-2 beta; Short=TRA2-beta; AltName: Full=RA301; AltName: Full=Splicing factor, arginine/serine-rich 10; AltName: Full=Transformer-2 protein homolog B >P62995.1 RecName: Full=Transformer-2 protein homolog beta; Short=TRA-2 beta; Short=TRA2-beta; Short=hTRA2-beta; AltName: Full=Splicing factor, arginine/serine-rich 10; AltName:…	RRM_1
ENSMUSG00000040794	2286.92	1392.53	1387.16	847.558	600.201	827.511	1688.87	758.424	1.15519	9.70176e-10	1.17068e-06	C1qtnf4	2	90716204	90720869	+	1290	protein_coding	- && Q8R066.1 RecName: Full=Complement C1q tumor necrosis factor-related protein 4; Flags: Precursor && PF00386:C1q domain	-
ENSMUSG00000070720	74.199	55.9999	60.0973	33.86	28.8867	22.8997	63.4321	28.5488	1.15348	0.00102075	0.00868926	Tmem200b	4	131648511	131650451	+	1476	protein_coding	- && Q69YZ2.1 RecName: Full=Transmembrane protein 200B; AltName: Full=Transmembrane protein TTMA; AltName: Full=Two transmembrane domain-containing family member B && PF10177:Uncharacterised conserved protein (DUF2371)	-
ENSMUSG00000095304	620.975	281.866	325.117	215.858	177.6	160.298	409.319	184.585	1.15003	4.19025e-06	0.000251763	Plac9a	14	25887930	25903524	-	1751	protein_coding	- && Q8K262.1 RecName: Full=Placenta-specific protein 9; Flags: Precursor && PF15205:Placenta-specific protein 9	-
ENSMUSG00000079022	30.9163	28	34.4821	13.7556	6.41926	21.8588	31.1328	14.0112	1.14873	0.0253736	1	Col22a1	15	71667644	71906076	-	9203	protein_coding	- && Q8NFW1.2 RecName: Full=Collagen alpha-1(XXII) chain; Flags: Precursor && PF01391:Collagen triple helix repeat (20 copies)|PF00092:von Willebrand factor type A domain	VWA
ENSMUSG00000118071	21.1997	38.2666	24.63	14.8138	13.9084	9.36805	28.0321	12.6967	1.14298	0.0283054	1	Gm50455	17	31781756	31784666	-	2911	lncRNA	- && - && -	-
ENSMUSG00000110279	30.0329	33.5999	36.4525	17.9881	8.55902	18.7361	33.3618	15.0944	1.14162	0.0170165	1	Gm45552	7	44771341	44773568	+	778	lncRNA	- && - && -	-
ENSMUSG00000096727	54.766	37.3333	28.5709	21.1625	12.8385	20.8179	40.2234	18.273	1.14043	0.0114885	0.0462478	Psmb9	17	34400961	34406738	-	3660	protein_coding	- && P28076.1 RecName: Full=Proteasome subunit beta type-9; AltName: Full=LMP-2d; AltName: Full=Low molecular mass protein 2; AltName: Full=Macropain chain 7; AltName: Full=Multicatalytic endopeptidase complex chain 7; AltName: Full=Proteasome chain 7; AltName: Full=Proteasome subunit beta-1i; AltName: Full=Really interesting new gene 12 protein; Flags: Precursor && PF00227:Proteasome subunit	Proteasome
ENSMUSG00000087165	187.264	83.0665	101.476	40.2088	49.2144	80.1489	123.936	56.524	1.13357	0.000831441	0.00752531	2010001A14Rik	11	57686325	57692243	-	714	lncRNA	- && - && -	-
ENSMUSG00000096883	416.045	357.466	256.152	144.963	146.573	180.075	343.221	157.204	1.12735	4.96383e-08	1.56253e-05	Shisa8	15	82090369	82097016	-	2776	protein_coding	- && B8ZZ34.2 RecName: Full=Putative protein shisa-8; Flags: Precursor && -	-
ENSMUSG00000063765	345.379	229.6	224.626	122.743	124.106	119.703	266.535	122.184	1.12667	1.77573e-07	3.29648e-05	Chadl	15	81562497	81581488	-	5257	protein_coding	- && E9Q7T7.1 RecName: Full=Chondroadherin-like protein; Flags: Precursor && -	-
ENSMUSG00000081559	86.5655	52.2666	40.3933	28.5694	24.6072	29.145	59.7418	27.4405	1.12535	0.00371447	0.0208633	Gm12411	4	45550017	45550499	+	483	processed_pseudogene	- && P46778.2 RecName: Full=60S ribosomal protein L21 && PF01157:Ribosomal protein L21e	-
ENSMUSG00000046806	51.2327	48.5333	38.4229	26.4531	20.3277	16.6543	46.0629	21.145	1.12528	0.00538504	0.0270339	Cyren	6	34848706	34854995	-	4269	protein_coding	- && Q8BGY5.1 RecName: Full=Transmembrane protein 140 && -	-
ENSMUSG00000104784	69.7824	23.3333	25.6152	14.8138	16.0482	23.9406	39.577	18.2675	1.11856	0.0275915	0.0864388	Gm42984	5	44383929	44400890	+	987	lncRNA	- && - && -	-
ENSMUSG00000074676	33.5662	31.7333	28.5709	9.52313	14.9783	18.7361	31.2901	14.4125	1.11841	0.0207091	1	Foxs1	2	152773818	152775128	-	1311	protein_coding	- && - && PF00250:Forkhead domain	Fork_head
ENSMUSG00000091648	42.3995	37.3333	32.5117	25.395	12.8385	13.5316	37.4148	17.2551	1.11803	0.0140959	0.0535555	C2cd4d	3	94269745	94271873	+	1947	protein_coding	- && - && PF00168:C2 domain	C2
ENSMUSG00000043165	200.514	103.6	133.002	75.1269	42.7951	84.3125	145.705	67.4115	1.11237	0.000246521	0.0033175	Lor	3	91987578	91990449	-	1779	protein_coding	- && - && PF15847:Major keratinocyte cell envelope protein	-
ENSMUSG00000031760	4415.73	2327.73	3700.42	1502.54	1242.13	2095.32	3481.29	1613.33	1.10957	0.00107429	0.00898807	Mt3	8	94879235	94880774	+	1066	protein_coding	- && - && -	-
ENSMUSG00000052135	75.0824	63.4666	50.2453	29.6275	28.8867	29.145	62.9314	29.2197	1.10881	0.00146724	0.0111736	Foxo6	4	120124276	120144546	-	2615	protein_coding	- && Q70KY4.1 RecName: Full=Forkhead box protein O6 && -	-
ENSMUSG00000078302	43.2828	38.2666	27.5857	12.6975	19.2578	18.7361	36.3783	16.8971	1.1085	0.0144668	0.0545704	Foxd1	13	98490750	98495813	+	5064	protein_coding	- && Q61345.2 RecName: Full=Forkhead box protein D1; AltName: Full=Brain factor 2; Short=BF-2; AltName: Full=Forkhead-related protein FKHL8; AltName: Full=Forkhead-related transcription factor 4; Short=FREAC-4; AltName: Full=HFH-BF-2 && -	-
ENSMUSG00000028584	27.383	45.7333	17.7336	13.7556	12.8385	15.6134	30.2833	14.0692	1.10704	0.0326258	1	Lrrc38	4	143076327	143097602	+	2324	protein_coding	- && A2VDH3.2 RecName: Full=Leucine-rich repeat-containing protein 38; AltName: Full=BK channel auxiliary gamma subunit LRRC38; Flags: Precursor && PF13855:Leucine rich repeat	-
ENSMUSG00000070858	666.025	463.866	295.561	189.404	198.997	273.755	475.15	220.719	1.1069	4.37073e-06	0.000261521	Gm1673	5	34140777	34142357	+	669	protein_coding	- && Q3UR78.2 RecName: Full=Neuropeptide-like protein C4orf48 homolog; Flags: Precursor && PF15161:Neuropeptide-like	-
ENSMUSG00000110462	23.8497	23.3333	18.7188	9.52313	11.7686	9.36805	21.9673	10.2199	1.1059	0.0478256	1	Gm35572	8	72204670	72233966	-	2310	lncRNA	- && - && -	-
ENSMUSG00000040714	29.1496	27.0666	18.7188	14.8138	12.8385	7.28626	24.9784	11.6462	1.10434	0.0423065	1	Klc3	7	19128362	19138029	-	2647	protein_coding	- && Q91W40.1 RecName: Full=Kinesin light chain 3 && PF13424:Tetratricopeptide repeat	-
ENSMUSG00000080921	391.312	142.8	158.617	102.638	79.1709	140.521	230.91	107.443	1.1041	0.036286	0.105232	Rpl38-ps2	6	140692686	140692898	-	213	processed_pseudogene	- && Q9JJI8.3 RecName: Full=60S ribosomal protein L38 && -	-
ENSMUSG00000048731	35.3329	27.0666	25.6152	10.5813	6.41926	23.9406	29.3382	13.647	1.10276	0.0413122	1	Ggnbp1	17	27236961	27256598	+	5705	protein_coding	- && Q6K1E7.2 RecName: Full=Gametogenetin-binding protein 1 && PF14836:Ubiquitin-like domain	-
ENSMUSG00000073421	135.148	74.6665	70.9345	69.8363	24.6072	36.4313	93.5831	43.6249	1.10274	0.00343857	0.0197581	H2-Ab1	17	34476663	34488393	+	2568	protein_coding	- && - && PF07654:Immunoglobulin C1-set domain|PF00969:Class II histocompatibility antigen, beta domain	C1-set
ENSMUSG00000016252	2277.2	1388.8	1168.45	683.549	544.568	1023.2	1611.48	750.439	1.10262	0.00681796	0.0318157	Atp5e	2	174302865	174305898	-	1756	protein_coding	- && P56382.2 RecName: Full=ATP synthase subunit epsilon, mitochondrial; Short=ATPase subunit epsilon && -	-
ENSMUSG00000097248	57.4159	45.7333	48.2749	20.1044	18.1879	32.2677	50.4747	23.52	1.10107	0.00505243	0.0258422	Gm2694	8	88187097	88252182	+	5744	lncRNA	- && - && -	-
ENSMUSG00000109147	48.5827	34.5333	41.3785	22.2206	17.118	18.7361	41.4982	19.3583	1.10088	0.00849328	0.0372449	4930431P19Rik	7	109351527	109354485	+	2959	transcribed_processed_pseudogene	- && Q64152.3 RecName: Full=Transcription factor BTF3; AltName: Full=Nascent polypeptide-associated complex subunit beta; Short=NAC-beta; AltName: Full=RNA polymerase B transcription factor 3 && -	-
ENSMUSG00000033434	137.798	124.133	95.5646	60.3131	57.7734	48.922	119.165	55.6695	1.09994	4.43823e-05	0.00112747	Gtpbp6	5	110251841	110256063	-	2825	protein_coding	- && - && PF13167:GTP-binding GTPase N-terminal|PF01926:50S ribosome-binding GTPase|PF16360:GTP-binding GTPase Middle Region	-
ENSMUSG00000054612	29.1496	41.9999	23.6448	11.6394	16.0482	16.6543	31.5981	14.7806	1.09684	0.0242415	1	Mgmt	7	136496343	136731995	+	2894	protein_coding	- && - && -	-
ENSMUSG00000031070	26.4997	28	19.704	10.5813	11.7686	12.4907	24.7345	11.6135	1.09206	0.0390596	1	Mrgprf	7	144854565	144863294	+	2214	protein_coding	- && Q8VCJ6.1 RecName: Full=Mas-related G-protein coupled receptor member F; Short=Mas-related gene F protein && PF00001:7 transmembrane receptor (rhodopsin family)	7tm_1
ENSMUSG00000025732	165.181	122.266	102.461	53.9644	53.4939	75.9853	129.97	61.1479	1.08886	8.64342e-05	0.00172971	Mcrip2	17	26082672	26087738	-	1307	protein_coding	- && Q9CQB2.1 RecName: Full=MAPK regulated corepressor interacting protein 2; AltName: Full=Protein FAM195A && PF14799:FAM195 family	-
ENSMUSG00000025226	389.545	274.4	284.723	169.3	112.337	167.584	316.223	149.74	1.07885	4.12964e-07	6.10176e-05	Fbxl15	19	46316623	46318885	+	1348	protein_coding	- && - && -	-
ENSMUSG00000019737	31.7996	28.9333	30.5413	12.6975	21.3975	9.36805	30.4247	14.4877	1.0726	0.0299851	1	Syne4	7	30014232	30018471	+	2946	protein_coding	- && Q8CII8.1 RecName: Full=Nesprin-4; AltName: Full=Nuclear envelope spectrin repeat protein 4 && PF10541:Nuclear envelope localisation domain	-
novel.215	37.9828	21.4666	24.63	12.6975	9.6289	17.6952	28.0265	13.3405	1.07191	0.0389581	1	-	X	168909029	168910388	-	431	-	- && P50427.1 RecName: Full=Steryl-sulfatase; AltName: Full=Arylsulfatase C; Short=ASC; AltName: Full=Steroid sulfatase; AltName: Full=Steryl-sulfate sulfohydrolase; Flags: Precursor && PF00884:Sulfatase	Sulfatase
ENSMUSG00000047591	554.726	470.399	319.205	185.172	203.277	252.937	448.11	213.795	1.06834	2.50946e-07	4.19321e-05	Mafa	15	75617339	75620077	-	2739	protein_coding	- && - && PF03131:bZIP Maf transcription factor|PF08383:Maf N-terminal region	bZIP_Maf
ENSMUSG00000075268	95.3988	79.3332	45.3193	31.7438	21.3975	52.0447	73.3504	35.062	1.06568	0.00578616	0.0283628	Gm10819	19	16244425	16244985	-	561	processed_pseudogene	- && P70296.3 RecName: Full=Phosphatidylethanolamine-binding protein 1; Short=PEBP-1; AltName: Full=HCNPpp; Contains: RecName: Full=Hippocampal cholinergic neurostimulating peptide; Short=HCNP && PF01161:Phosphatidylethanolamine-binding protein	-
ENSMUSG00000054716	1133.3	697.199	696.538	413.727	388.365	405.949	842.346	402.68	1.06539	6.08891e-09	4.64039e-06	Zfp771	7	126843446	126853975	+	2009	protein_coding	- && - && PF00096:Zinc finger, C2H2 type	zf-C2H2
ENSMUSG00000095098	2345.22	1351.46	1349.73	803.117	783.15	827.511	1682.14	804.593	1.0643	6.47235e-09	4.68598e-06	Ccdc85b	19	5503208	5507922	-	4715	protein_coding	- && Q6PDY0.1 RecName: Full=Coiled-coil domain-containing protein 85B; AltName: Full=Hepatitis delta antigen-interacting protein A homolog; Short=Delta-interacting protein A homolog && -	-
ENSMUSG00000035085	47.6994	24.2666	22.6596	10.5813	19.2578	15.6134	31.5419	15.1508	1.06195	0.0369815	1	1700020L24Rik	11	83328503	83332059	+	1050	protein_coding	- && - && PF15470:Domain of unknown function (DUF4637)	-
ENSMUSG00000040610	179.314	92.3998	85.7126	60.3131	44.9348	66.6173	119.142	57.2884	1.05816	0.000918195	0.00804323	Tlx3	11	33150752	33153589	-	1533	protein_coding	- && O55144.2 RecName: Full=T-cell leukemia homeobox protein 3; AltName: Full=Homeobox TLX-3; AltName: Full=Homeobox protein Hox-11L2; AltName: Full=Respiratory neuron homeobox protein && PF00046:Homeobox domain	Homeobox
ENSMUSG00000030108	203.164	240.8	119.209	85.7082	62.0529	122.826	187.724	90.1955	1.05769	0.000243039	0.0032803	Slc6a13	6	121277186	121314692	+	2904	protein_coding	- && P31649.1 RecName: Full=Sodium- and chloride-dependent GABA transporter 2; Short=GAT-2; AltName: Full=Sodium- and chloride-dependent GABA transporter 3; Short=GAT-3; AltName: Full=Solute carrier family 6 member 13 && PF00209:Sodium:neurotransmitter symporter family	SNF
ENSMUSG00000063457	4959.85	3449.59	2777.28	1710.99	1563.09	2109.89	3728.91	1794.66	1.05516	3.36565e-09	3.24898e-06	Rps15	10	80128287	80129948	+	630	protein_coding	- && P62844.2 RecName: Full=40S ribosomal protein S15; AltName: Full=RIG protein >P62845.2 RecName: Full=40S ribosomal protein S15; AltName: Full=RIG protein >P62841.2 RecName: Full=40S ribosomal protein S15; AltName: Full=RIG protein >P62842.2 RecName: Full=40S ribosomal protein S15; AltName: Full=RIG protein >P62843.2 RecName: Full=40S ribosomal protein S15; AltName: Full=RIG protein >P62846.2 …	-
ENSMUSG00002076161	129.848	73.7332	61.0825	31.7438	42.7951	53.0856	88.2213	42.5415	1.05443	0.00248737	0.0159438	7SK	9	78082585	78082915	-	331	misc_RNA	- && - && -	-
ENSMUSG00000062619	70.6658	30.7999	36.4525	22.2206	27.8168	16.6543	45.9727	22.2306	1.05234	0.0173125	0.0620661	2310039H08Rik	17	47083561	47084322	+	762	protein_coding	- && - && -	-
ENSMUSG00000028441	38.8662	26.1333	24.63	12.6975	20.3277	10.4089	29.8765	14.478	1.04914	0.0366251	1	1110017D15Rik	4	41505009	41517333	-	1421	protein_coding	- && Q2MH31.1 RecName: Full=Spermatid-specific manchette-related protein 1; AltName: Full=Ciliated bronchial epithelial protein 1 && PF15181:Spermatid-specific manchette-related protein 1	-
ENSMUSG00000047370	43.2828	30.7999	32.5117	13.7556	14.9783	22.8997	35.5315	17.2112	1.04612	0.0214192	1	Gm7367	7	59805357	59805848	+	492	processed_pseudogene	- && - && PF14555:UBA-like domain	-
ENSMUSG00000020773	128.082	93.3332	120.195	65.6038	40.6553	59.331	113.87	55.1967	1.0444	0.000202487	0.00292908	Trim47	11	115996578	116018036	-	2735	protein_coding	- && - && -	-
novel.128	237.614	160.533	121.18	83.5919	78.101	90.5578	173.109	84.0836	1.0436	7.4348e-05	0.00156663	-	4	156389622	156410872	+	3121	-	- && Q8VBZ0.2 RecName: Full=Dehydrogenase/reductase SDR family member on chromosome X homolog; AltName: Full=DHRSXY; AltName: Full=SCAD family protein; Flags: Precursor && PF00106:short chain dehydrogenase	adh_short
ENSMUSG00000002104	42.3995	36.3999	27.5857	25.395	9.6289	16.6543	35.4617	17.2261	1.04294	0.0283073	1	Rapsn	2	90865965	90876074	+	1802	protein_coding	- && P12672.4 RecName: Full=43 kDa receptor-associated protein of the synapse; Short=RAPsyn; AltName: Full=43 kDa postsynaptic protein; AltName: Full=Acetylcholine receptor-associated 43 kDa protein && PF10579:Rapsyn N-terminal myristoylation and linker region|PF13639:Ring finger domain	-
ENSMUSG00000060969	143.098	114.8	73.8901	34.9181	49.2144	77.0262	110.596	53.7196	1.04277	0.00159417	0.0118438	Irx1	13	72106040	72111842	-	2620	protein_coding	- && P81068.4 RecName: Full=Iroquois-class homeodomain protein IRX-1; AltName: Full=Homeodomain protein IRXA1; AltName: Full=Iroquois homeobox protein 1 && -	-
ENSMUSG00000059900	38.8662	41.0666	17.7336	24.3369	14.9783	8.32716	32.5555	15.8808	1.0394	0.047558	1	Tmem40	6	115706092	115739371	-	2140	protein_coding	- && Q4FJU9.1 RecName: Full=Transmembrane protein 40 && PF15817:Transmembrane protein 40 family	-
ENSMUSG00000046337	374.528	432.133	157.632	187.288	143.364	139.48	321.431	156.711	1.03742	0.000192184	0.00283672	Fam178b	1	36601773	36722264	-	3190	protein_coding	- && - && -	-
ENSMUSG00000019158	565.326	393.866	387.184	281.461	158.342	217.547	448.792	219.117	1.03483	1.33103e-06	0.000131111	Tmem160	7	16186704	16189419	+	883	protein_coding	- && - && -	-
ENSMUSG00000087687	167.831	88.6665	58.1269	52.9063	44.9348	56.2083	104.875	51.3498	1.03285	0.0033263	0.0193666	Pet100	8	3671548	3675848	+	1788	protein_coding	- && P0DJE0.1 RecName: Full=Protein PET100 homolog, mitochondrial; Flags: Precursor && -	-
ENSMUSG00000089762	238.497	120.4	111.328	87.8244	67.4023	74.9444	156.742	76.7237	1.03268	0.000477847	0.00517518	Ier5l	2	30361549	30364231	-	2683	protein_coding	- && Q99J55.1 RecName: Full=Immediate early response gene 5-like protein && -	-
ENSMUSG00000020308	1200.43	869.865	809.836	545.993	341.291	522.529	960.045	469.938	1.03085	4.89585e-08	1.56253e-05	Tpgs1	10	79505203	79511961	+	1402	protein_coding	- && - && -	-
ENSMUSG00000023411	32.6829	45.7333	31.5265	20.1044	21.3975	12.4907	36.6475	17.9976	1.02733	0.0221977	0.0740687	Nfatc4	14	56060601	56071400	+	5808	protein_coding	- && Q8K120.2 RecName: Full=Nuclear factor of activated T-cells, cytoplasmic 4; Short=NF-ATc4; Short=NFATc4; AltName: Full=T-cell transcription factor NFAT3; Short=NF-AT3 && PF16179:Rel homology dimerisation domain|PF00554:Rel homology DNA-binding domain	RHD
ENSMUSG00000031662	37.9828	33.5999	22.6596	15.8719	8.55902	21.8588	31.4141	15.4299	1.02611	0.0402977	1	Snx20	8	89353191	89362756	-	6439	protein_coding	- && - && PF00787:PX domain	PX
ENSMUSG00000023153	71.5491	79.3332	82.757	45.4994	22.4674	46.8403	77.8797	38.269	1.02321	0.00219127	0.0147101	Tmem52	4	155553571	155555315	+	1157	protein_coding	- && - && PF14979:Transmembrane 52	-
ENSMUSG00000029149	22.9664	35.4666	31.5265	11.6394	10.6988	21.8588	29.9865	14.7323	1.02202	0.0417317	1	Krtcap3	5	31409035	31410546	+	1338	protein_coding	- && - && PF12304:Beta-casein like protein	-
ENSMUSG00000040428	1938.01	1750.93	919.193	1127.96	651.555	490.261	1536.04	756.593	1.02171	0.0290428	0.0896176	Plekha4	7	45175754	45203653	+	6371	protein_coding	- && P60669.1 RecName: Full=Pleckstrin homology domain-containing family A member 4; Short=PH domain-containing family A member 4; AltName: Full=Phosphoinositol 3-phosphate-binding protein 1; Short=PEPP-1 && PF00169:PH domain	PH
ENSMUSG00000021200	47.6994	65.3332	36.4525	27.5113	16.0482	30.1859	49.8284	24.5818	1.01923	0.0125101	0.0491446	Asb2	12	103287401	103322260	-	3542	protein_coding	- && - && PF13857:Ankyrin repeats (many copies)|PF12796:Ankyrin repeats (3 copies)|PF07525:SOCS box|PF13637:Ankyrin repeats (many copies)	SOCS_box
ENSMUSG00000018822	458.444	384.533	318.22	227.497	160.482	185.279	387.066	191.086	1.01914	1.40129e-07	2.70543e-05	Sfrp5	19	42186410	42190691	-	1900	protein_coding	- && - && PF01759:UNC-6/NTR/C345C module|PF01392:Fz domain	Fz
ENSMUSG00000059058	45.9327	48.5333	22.6596	23.2788	7.48914	27.0633	39.0419	19.2771	1.01861	0.0412031	0.1152	Tma7-ps	1	171538656	171538850	+	195	processed_pseudogene	- && Q9Y2S6.1 RecName: Full=Translation machinery-associated protein 7; AltName: Full=Coiled-coil domain-containing protein 72 >Q8K003.1 RecName: Full=Translation machinery-associated protein 7; AltName: Full=Coiled-coil domain-containing protein 72 >A1A4Q4.1 RecName: Full=Translation machinery-associated protein 7; AltName: Full=Coiled-coil domain-containing protein 72 && -	-
ENSMUSG00000035172	302.979	298.666	220.685	168.242	106.988	131.153	274.11	135.461	1.01755	2.36638e-06	0.000184218	Plekhh3	11	101053505	101062177	-	3582	protein_coding	- && Q8VCE9.1 RecName: Full=Pleckstrin homology domain-containing family H member 3; Short=PH domain-containing family H member 3; Flags: Precursor && PF00784:MyTH4 domain|PF00373:FERM central domain	Band_41
ENSMUSG00000022574	160.765	134.4	127.091	62.4294	55.6336	90.5578	140.752	69.5403	1.01718	8.60456e-05	0.00172807	Naprt	15	75762805	75766330	-	2344	protein_coding	- && Q8CC86.1 RecName: Full=Nicotinate phosphoribosyltransferase; Short=NAPRTase; AltName: Full=Nicotinate phosphoribosyltransferase domain-containing protein 1 && -	-
ENSMUSG00000085071	40.6328	65.3332	23.6448	21.1625	17.118	26.0224	43.2036	21.4343	1.01207	0.0258273	0.0825927	Gm14066	2	139098796	139519634	-	2057	lncRNA	- && - && -	-
ENSMUSG00000007944	483.177	329.466	413.785	198.928	190.438	220.67	408.809	203.345	1.00774	3.32854e-08	1.33881e-05	Ttc9b	7	27353340	27356771	+	2052	protein_coding	- && - && -	-
ENSMUSG00000060032	537.06	350.933	376.347	219.032	175.46	235.242	421.447	209.911	1.00608	3.40129e-07	5.4723e-05	H2aj	6	136785242	136787072	+	1831	protein_coding	- && Q8R1M2.1 RecName: Full=Histone H2A.J; Short=H2a/j >A9UMV8.1 RecName: Full=Histone H2A.J; Short=H2a/j && PF16211:C-terminus of histone H2A|PF00125:Core histone H2A/H2B/H3/H4	Histone
ENSMUSG00000048373	67.1325	43.8666	32.5117	22.2206	20.3277	29.145	47.8369	23.8978	1.00373	0.0155133	0.0574478	Fgfbp1	5	44136200	44139121	-	2263	protein_coding	- && O70514.1 RecName: Full=Fibroblast growth factor-binding protein 1; Short=FGF-BP; Short=FGF-BP1; Short=FGF-binding protein 1; Short=FGFBP-1; Flags: Precursor && PF06473:FGF binding protein 1 (FGF-BP1)	-
ENSMUSG00000033007	100.699	82.1332	87.683	41.2669	39.5855	54.1265	90.1716	44.993	1.00291	0.000616607	0.00614485	Asic4	1	75427080	75450987	+	2727	protein_coding	- && Q96FT7.2 RecName: Full=Acid-sensing ion channel 4; Short=ASIC4; AltName: Full=Amiloride-sensitive cation channel 4; AltName: Full=Amiloride-sensitive cation channel 4, pituitary && -	-
ENSMUSG00000028743	526.46	380.799	289.649	209.509	171.18	217.547	398.97	199.412	1.00147	2.40451e-06	0.000184218	Akr7a5	4	139038055	139045737	+	1793	protein_coding	- && Q8CG76.3 RecName: Full=Aflatoxin B1 aldehyde reductase member 2; AltName: Full=Succinic semialdehyde reductase; Short=SSA reductase && PF00248:Aldo/keto reductase family	Aldo_ket_red
ENSMUSG00000064364	41.5161	40.1333	19.704	69.8363	51.3541	82.2307	33.7845	67.807	-1.001	0.00597208	0.029087	mt-Th	MT	11546	11612	+	67	Mt_tRNA	- && - && -	-
ENSMUSG00000085526	8.83322	14	22.6596	23.2788	36.3758	31.2268	15.1643	30.2938	-1.00574	0.0457181	1	Gm16083	1	130390313	130484812	+	2547	lncRNA	- && - && -	-
ENSMUSG00000085611	30.0329	14.9333	26.6004	50.79	55.6336	37.4722	23.8556	47.9653	-1.00599	0.0130445	0.0506802	Ap3s1-ps1	X	37774469	37775047	-	579	processed_pseudogene	- && - && PF01217:Clathrin adaptor complex small chain	-
novel.11	30.0329	21.4666	25.6152	40.2088	66.3324	48.922	25.7049	51.8211	-1.00964	0.00823486	0.0363983	-	10	85220840	85222470	+	1631	-	- && - && -	-
ENSMUSG00000069892	21.1997	28.9333	29.5561	53.9644	56.7035	49.9629	26.563	53.5436	-1.01394	0.00520014	0.0264199	9930111J21Rik2	11	48906701	48942069	-	7017	protein_coding	- && Q62293.1 RecName: Full=T-cell-specific guanine nucleotide triphosphate-binding protein 1; AltName: Full=Interferon-gamma-inducible GTPase Ifggb5 >Q3T9E4.2 RecName: Full=T-cell-specific guanine nucleotide triphosphate-binding protein 2; AltName: Full=Interferon-gamma-inducible GTPase Ifggb6 protein; AltName: Full=T-cell-specific guanine nucleotide triphosphate-binding protein && -	-
ENSMUSG00000067916	44.1661	31.7333	56.1565	68.7782	131.595	66.6173	44.0186	88.9968	-1.01666	0.00330297	0.0192851	Zfp991	4	147216495	147265036	+	2917	protein_coding	- && Q6ZN06.2 RecName: Full=Zinc finger protein 813 && PF01352:KRAB box	KRAB
ENSMUSG00000064349	817.956	628.132	674.863	1206.26	1585.56	1540.52	706.984	1444.12	-1.03001	3.8658e-12	1.39942e-08	mt-Tc	MT	5192	5257	-	66	Mt_tRNA	- && - && -	-
ENSMUSG00000082938	22.9664	16.8	20.6892	53.9644	43.865	26.0224	20.1519	41.2839	-1.03307	0.0175359	0.0626806	Gm2810	5	40485781	40486770	+	990	processed_pseudogene	- && Q9DA19.2 RecName: Full=Corepressor interacting with RBPJ 1; AltName: Full=CBF1-interacting corepressor && -	-
ENSMUSG00000114025	29.1496	27.0666	37.4377	48.6738	82.3805	60.3719	31.218	63.8087	-1.03314	0.003518	0.0201108	Gm49331	12	17952390	17954676	+	1214	unprocessed_pseudogene	- && - && -	-
ENSMUSG00000020973	13.2498	14.9333	9.85202	23.2788	24.6072	30.1859	12.6784	26.024	-1.03531	0.0426069	1	Dnaaf2	12	69235861	69245203	-	3390	protein_coding	- && - && PF08190:pre-RNA processing PIH1/Nop17	-
ENSMUSG00000064366	97.1654	120.4	92.609	208.451	237.513	194.647	103.391	213.537	-1.04584	6.01958e-07	7.81395e-05	mt-Tl2	MT	11671	11741	+	71	Mt_tRNA	- && - && -	-
ENSMUSG00000031304	15.8998	16.8	15.7632	23.2788	52.424	24.9815	16.1543	33.5614	-1.05382	0.0307521	1	Il2rg	X	100307984	100311861	-	2387	protein_coding	- && - && PF00041:Fibronectin type III domain|PF09240:Interleukin-6 receptor alpha chain, binding	fn3
ENSMUSG00000026380	9.71654	17.7333	14.778	17.9881	32.0963	37.4722	14.076	29.1856	-1.05544	0.0395407	1	Tfcp2l1	1	118555675	118612898	+	9438	protein_coding	- && - && PF04516:CP2 transcription factor	CP2
novel.35	9.71654	21.4666	17.7336	28.5694	50.2842	22.8997	16.3056	33.9178	-1.05956	0.033532	1	-	12	15782354	15783325	+	972	-	- && - && -	-
ENSMUSG00000044103	15.0165	6.53332	13.7928	27.5113	24.6072	21.8588	11.7809	24.6591	-1.06453	0.0489861	1	Il36g	2	24076488	24083580	+	1648	protein_coding	- && - && -	-
ENSMUSG00000106980	13.2498	25.2	13.7928	35.9763	49.2144	26.0224	17.4142	37.071	-1.08948	0.0200412	0.069086	Gm43690	5	150494298	150494563	-	266	lncRNA	- && - && -	-
ENSMUSG00000026579	17.6664	20.5333	15.7632	33.86	44.9348	36.4313	17.9877	38.4087	-1.09313	0.010627	0.0436412	F5	1	163979407	164047846	+	7430	protein_coding	- && O88783.1 RecName: Full=Coagulation factor V; AltName: Full=Activated protein C cofactor; Contains: RecName: Full=Coagulation factor V heavy chain; Contains: RecName: Full=Coagulation factor V light chain; Flags: Precursor && PF00754:F5/8 type C domain|PF07732:Multicopper oxidase	F5_F8_type_C
ENSMUSG00000071640	17.6664	19.6	31.5265	38.0925	63.1228	45.7994	22.931	49.0049	-1.10024	0.00700073	0.032449	Stxbp3-ps	19	9535156	9536547	-	758	processed_pseudogene	- && Q60770.1 RecName: Full=Syntaxin-binding protein 3; AltName: Full=MUNC-18-3; AltName: Full=Mammalian homolog of Unc-18c; Short=Munc-18c; AltName: Full=Protein unc-18 homolog 3; Short=Unc18-3; AltName: Full=Protein unc-18 homolog C; Short=Unc-18C && PF00995:Sec1 family	Sec1
ENSMUSG00000057696	16.7831	10.2666	13.7928	16.93	39.5855	31.2268	13.6142	29.2474	-1.10104	0.0335961	1	Rpl30-ps1	6	38353742	38354089	+	348	processed_pseudogene	- && Q76KA2.3 RecName: Full=60S ribosomal protein L30 >P62890.2 RecName: Full=60S ribosomal protein L30 >P62888.2 RecName: Full=60S ribosomal protein L30 >P62889.2 RecName: Full=60S ribosomal protein L30 >Q3T0D5.3 RecName: Full=60S ribosomal protein L30 && PF01248:Ribosomal protein L7Ae/L30e/S12e/Gadd45 family	-
ENSMUSG00000038541	31.7996	15.8666	23.6448	58.1969	79.1709	16.6543	23.7704	51.3407	-1.10801	0.0242175	0.0787491	Srd5a2	17	74323950	74354911	-	1605	protein_coding	- && - && PF02544:3-oxo-5-alpha-steroid 4-dehydrogenase	-
ENSMUSG00000079363	46.8161	76.5332	28.5709	84.65	187.229	56.2083	50.64	109.362	-1.10868	0.00621465	0.0298072	Gbp4	5	105263633	105287452	-	7494	protein_coding	- && - && -	-
ENSMUSG00000074527	13.2498	24.2666	11.8224	21.1625	63.1228	22.8997	16.4463	35.7283	-1.11762	0.0356887	1	Gm14296	2	176584302	176619602	-	9870	protein_coding	- && - && -	-
ENSMUSG00000091511	15.0165	13.0666	25.6152	41.2669	44.9348	30.1859	17.8995	38.7959	-1.12062	0.0125062	0.0491425	Vmn2r87	10	130306921	130333265	-	3333	protein_coding	- && E9Q6I0.1 RecName: Full=Vomeronasal type-2 receptor 116; AltName: Full=Vomeronasal type-2 receptor P5; Flags: Precursor && PF07562:Nine Cysteines Domain of family 3 GPCR|PF01094:Receptor family ligand binding region|PF00003:7 transmembrane sweet-taste receptor of 3 GCPR	7tm_3
ENSMUSG00000059751	25.6163	18.6666	33.4969	55.0225	75.9613	38.5131	25.9266	56.499	-1.12539	0.00439432	0.0234619	Rps3a3	13	108807137	108807931	+	795	processed_pseudogene	- && P97351.3 RecName: Full=40S ribosomal protein S3a; AltName: Full=Protein TU-11 && PF01015:Ribosomal S3Ae family	-
ENSMUSG00000111681	11.4832	30.7999	32.5117	51.8481	62.0529	51.0038	24.9316	54.9683	-1.14683	0.00504214	0.0258203	Gm47640	9	37180583	37183464	+	2882	TEC	- && - && -	-
ENSMUSG00000104361	8.83322	22.4	12.8076	27.5113	54.5637	15.6134	14.6803	32.5628	-1.15003	0.0380718	1	Gm38080	3	30882714	30882981	-	268	processed_pseudogene	- && - && -	-
ENSMUSG00000064360	1006.99	1120	1120.17	1634.8	3225.68	2372.2	1082.39	2410.89	-1.15541	3.31234e-10	4.79627e-07	mt-Nd3	MT	9459	9806	+	348	protein_coding	- && P03899.3 RecName: Full=NADH-ubiquinone oxidoreductase chain 3; AltName: Full=NADH dehydrogenase subunit 3 && -	-
ENSMUSG00000092094	17.6664	14.9333	30.5413	57.1388	33.1662	49.9629	21.047	46.756	-1.15695	0.00677192	0.0316927	Zfp804b	5	6819010	7394756	-	4430	protein_coding	- && A4D1E1.2 RecName: Full=Zinc finger protein 804B && PF12171:Zinc-finger double-stranded RNA-binding	-
ENSMUSG00000064365	53.8826	41.0666	72.9049	114.278	156.202	104.089	55.9514	124.856	-1.15998	5.23245e-05	0.00125648	mt-Ts2	MT	11613	11671	+	59	Mt_tRNA	- && - && -	-
ENSMUSG00000071035	7.06658	24.2666	7.88161	26.4531	33.1662	29.145	13.0716	29.5881	-1.17893	0.0315882	1	Gm5499	17	87385699	87386583	+	885	processed_pseudogene	- && Q9D710.1 RecName: Full=Thioredoxin-related transmembrane protein 2; AltName: Full=Thioredoxin domain-containing protein 14; Flags: Precursor && PF00085:Thioredoxin	-
ENSMUSG00000021139	8.83322	12.1333	14.778	21.1625	32.0963	28.1042	11.9149	27.121	-1.19131	0.021669	1	Gm20498	12	81405634	81579679	-	3241	protein_coding	- && - && PF00595:PDZ domain (Also known as DHR or GLGF)|PF14138:Cytochrome c oxidase assembly protein COX16	PDZ
ENSMUSG00000021758	12.3665	7.46665	14.778	27.5113	28.8867	22.8997	11.5371	26.4325	-1.19771	0.0227441	1	Ddx4	13	112734867	112789009	-	3014	protein_coding	- && - && PF00271:Helicase conserved C-terminal domain|PF00270:DEAD/DEAH box helicase	DEAD
ENSMUSG00000113623	8.83322	7.46665	9.85202	16.93	22.4674	20.8179	8.7173	20.0718	-1.20432	0.0405266	1	Gm48691	13	62550307	62564857	-	2000	transcribed_processed_pseudogene	- && E9QAG8.1 RecName: Full=Zinc finger protein 431; AltName: Full=Zinc finger protein 932 && PF01352:KRAB box	KRAB
ENSMUSG00000100480	8.83322	7.46665	8.86682	16.93	21.3975	19.777	8.3889	19.3682	-1.20708	0.0429237	1	Gm29156	1	43784944	43785442	-	499	lncRNA	- && - && -	-
ENSMUSG00000041301	8.83322	9.33332	14.778	43.3831	17.118	16.6543	10.9815	25.7185	-1.2321	0.0342576	1	Cftr	6	18170686	18322767	+	7765	protein_coding	- && P26361.2 RecName: Full=Cystic fibrosis transmembrane conductance regulator; Short=CFTR; AltName: Full=ATP-binding cassette sub-family C member 7; AltName: Full=Channel conductance-controlling ATPase; AltName: Full=cAMP-dependent chloride channel && -	-
ENSMUSG00000039232	7.9499	8.39999	15.7632	19.0463	44.9348	11.4498	10.7044	25.1436	-1.23623	0.0451965	1	Stx11	10	12813953	12840042	-	4209	protein_coding	- && Q9D3G5.1 RecName: Full=Syntaxin-11 && -	-
ENSMUSG00000029321	8.83322	17.7333	11.8224	19.0463	52.424	19.777	12.7963	30.4157	-1.2498	0.0250999	1	Slc10a6	5	103753577	103777269	-	2124	protein_coding	- && Q9CXB2.1 RecName: Full=Solute carrier family 10 member 6; AltName: Full=Sodium-dependent organic anion transporter && PF01758:Sodium Bile acid symporter family	-
ENSMUSG00000078995	7.9499	12.1333	6.89641	17.9881	20.3277	26.0224	8.99321	21.4461	-1.25309	0.0318578	1	Zfp456	13	67510232	67523929	-	4634	protein_coding	- && - && PF01352:KRAB box	KRAB
ENSMUSG00000066363	9.71654	11.2	27.5857	6.34875	35.3059	73.9035	16.1674	38.5194	-1.25868	0.0493237	0.130927	Serpina3f	12	104180803	104187388	+	2290	protein_coding	- && Q80X76.3 RecName: Full=Serine protease inhibitor A3F; Short=Serpin A3F && PF00079:Serpin (serine protease inhibitor)	Serpin
ENSMUSG00000059089	11.4832	9.33332	14.778	11.6394	29.9566	43.7176	11.8648	28.4378	-1.26407	0.0262098	1	Fcgr4	1	170846489	170857330	+	1256	protein_coding	- && - && PF13895:Immunoglobulin domain	-
novel.122	7.06658	12.1333	12.8076	14.8138	33.1662	29.145	10.6692	25.7083	-1.27365	0.0232616	1	-	4	12235322	12238038	+	2632	-	- && - && -	-
ENSMUSG00000073077	22.083	17.7333	20.6892	43.3831	52.424	51.0038	20.1685	48.937	-1.27812	0.00104146	0.00881888	Cfap47	X	78310165	78560891	-	9967	protein_coding	- && Q6ZTR5.4 RecName: Full=Cilia- and flagella-associated protein 47 && -	-
ENSMUSG00000028362	9.71654	26.1333	32.5117	17.9881	102.708	46.8403	22.7872	55.8455	-1.29761	0.0155923	0.0576107	Tnfsf8	4	63749545	63779584	-	3807	protein_coding	- && - && PF00229:TNF(Tumour Necrosis Factor) family	-
ENSMUSG00000069972	22.9664	17.7333	24.63	41.2669	56.7035	64.5355	21.7766	54.1686	-1.31565	0.000666502	0.00649459	Rps13-ps2	7	88179654	88180106	-	453	processed_pseudogene	- && - && PF08069:Ribosomal S13/S15 N-terminal domain|PF00312:Ribosomal protein S15	-
ENSMUSG00000070605	9.71654	12.1333	14.778	30.6856	34.2361	26.0224	12.2093	30.3147	-1.31587	0.00782218	1	Zfp992	4	146533480	146554749	+	4550	protein_coding	- && Q6ZN06.2 RecName: Full=Zinc finger protein 813 && PF01352:KRAB box	KRAB
ENSMUSG00000105272	9.71654	3.73333	16.7484	23.2788	26.7469	24.9815	10.0661	25.0024	-1.31879	0.0239349	1	Gm43071	3	106474921	106476952	+	2032	TEC	- && - && -	-
ENSMUSG00000111118	19.4331	24.2666	24.63	48.6738	64.1926	58.2901	22.7766	57.0522	-1.32687	0.000323744	0.00397947	Gm6545	19	12506119	12507904	-	1786	processed_pseudogene	- && - && PF13365:Trypsin-like peptidase domain	-
ENSMUSG00000052616	6.18325	8.39999	10.8372	12.6975	32.0963	19.777	8.47349	21.5236	-1.34948	0.0284198	1	Terb1	8	105173351	105236542	-	3749	protein_coding	- && - && -	-
ENSMUSG00000064369	202.281	285.6	266.004	557.632	908.326	484.016	251.295	649.991	-1.37155	1.80813e-10	3.19388e-07	mt-Te	MT	14071	14139	-	69	Mt_tRNA	- && - && -	-
ENSMUSG00000102420	5.29993	4.66666	4.92601	12.6975	17.118	11.4498	4.9642	13.7551	-1.46889	0.0453572	1	Gm37464	3	74929703	74931922	-	2220	TEC	- && - && -	-
ENSMUSG00000109724	25.6163	20.5333	16.7484	55.0225	52.424	68.699	20.966	58.7152	-1.48181	8.49978e-05	0.00172016	Gm18194	7	12529650	12533091	-	3442	transcribed_processed_pseudogene	- && - && -	-
ENSMUSG00000090164	11.4832	5.59999	5.91121	21.1625	20.3277	24.9815	7.6648	22.1572	-1.52401	0.011267	1	BC035044	6	128826053	128868089	-	1584	protein_coding	- && - && -	-
ENSMUSG00000100872	3.53329	8.39999	2.95561	20.1044	10.6988	12.4907	4.96296	14.4313	-1.5388	0.0424813	1	1700065J18Rik	1	192523969	192525048	+	393	lncRNA	- && - && -	-
ENSMUSG00000019913	3.53329	2.8	9.85202	15.8719	20.3277	11.4498	5.3951	15.8831	-1.56913	0.0331325	1	Sim1	10	50770850	50865248	+	8621	protein_coding	- && - && -	-
ENSMUSG00000021922	7.9499	12.1333	17.7336	19.0463	56.7035	37.4722	12.6056	37.7407	-1.58845	0.00251189	1	Itih4	14	30608433	30624310	+	3690	protein_coding	- && A6X935.2 RecName: Full=Inter alpha-trypsin inhibitor, heavy chain 4; Short=ITI heavy chain H4; Short=ITI-HC4; Short=Inter-alpha-inhibitor heavy chain 4; Flags: Precursor && PF00092:von Willebrand factor type A domain|PF06668:Inter-alpha-trypsin inhibitor heavy chain C-terminus|PF08487:Vault protein inter-alpha-trypsin domain	VWA
ENSMUSG00000025044	15.0165	5.59999	14.778	14.8138	80.2408	13.5316	11.7982	36.1954	-1.61596	0.0135885	1	Msr1	8	40034726	40095714	-	6344	protein_coding	- && P30204.3 RecName: Full=Macrophage scavenger receptor types I and II; AltName: Full=Macrophage acetylated LDL receptor I and II; AltName: Full=Scavenger receptor type A; Short=SR-A; AltName: CD_antigen=CD204 && PF03523:Macrophage scavenger receptor|PF01391:Collagen triple helix repeat (20 copies)|PF00530:Scavenger receptor cysteine-rich domain	SRCR
ENSMUSG00000117442	7.06658	6.53332	8.86682	7.40688	53.4939	13.5316	7.4889	24.8108	-1.7288	0.0150152	1	1810073O08Rik	17	84225366	84229035	+	1853	lncRNA	- && - && -	-
ENSMUSG00000028259	4.41661	5.59999	0.985202	13.7556	7.48914	15.6134	3.66727	12.2861	-1.73486	0.0411066	1	Fhl5	4	25199908	25242876	-	1171	protein_coding	- && Q9WTX7.1 RecName: Full=Four and a half LIM domains protein 5; Short=FHL-5; AltName: Full=Activator of cAMP-responsive element modulator in testis; Short=Activator of CREM in testis && PF00412:LIM domain	LIM
ENSMUSG00000078922	9.71654	7.46665	1.9704	20.1044	37.4457	7.28626	6.38453	21.6121	-1.74718	0.0165681	1	Tgtp1	11	48876154	48884999	-	3205	protein_coding	- && Q62293.1 RecName: Full=T-cell-specific guanine nucleotide triphosphate-binding protein 1; AltName: Full=Interferon-gamma-inducible GTPase Ifggb5 >Q3T9E4.2 RecName: Full=T-cell-specific guanine nucleotide triphosphate-binding protein 2; AltName: Full=Interferon-gamma-inducible GTPase Ifggb6 protein; AltName: Full=T-cell-specific guanine nucleotide triphosphate-binding protein && PF05049:Inter…	IIGP
ENSMUSG00000026068	2.64997	3.73333	5.91121	6.34875	22.4674	12.4907	4.09817	13.769	-1.75624	0.031044	1	Il18rap	1	40554522	40590865	+	6752	protein_coding	- && - && -	-
ENSMUSG00000089798	6.18325	16.8	8.86682	29.6275	47.0746	31.2268	10.6167	35.9763	-1.76287	0.000686024	1	1700028K03Rik	5	107682575	107699408	+	7963	protein_coding	- && Q3KQP7.2 RecName: Full=Uncharacterized protein C1orf146 homolog && -	-
ENSMUSG00000037411	8.83322	4.66666	11.8224	13.7556	66.3324	6.24537	8.44077	28.7778	-1.77057	0.0158102	1	Serpine1	5	137090358	137101122	-	3876	protein_coding	- && P22777.1 RecName: Full=Plasminogen activator inhibitor 1; Short=PAI; Short=PAI-1; AltName: Full=Endothelial plasminogen activator inhibitor; AltName: Full=Serpin E1; Flags: Precursor && PF00079:Serpin (serine protease inhibitor)	Serpin
ENSMUSG00000104165	4.41661	0.933332	3.94081	11.6394	12.8385	7.28626	3.09692	10.5881	-1.77098	0.049436	1	Gm38249	1	16278421	16280741	-	2321	TEC	- && - && -	-
ENSMUSG00000026950	10.5999	17.7333	13.7928	101.58	28.8867	19.777	14.042	50.0812	-1.83586	0.000989149	0.00850069	Neb	2	52026659	52268486	-	26675	protein_coding	- && P20929.5 RecName: Full=Nebulin && PF00880:Nebulin repeat|PF14604:Variant SH3 domain	-
ENSMUSG00000114835	1.76664	2.8	4.92601	8.465	17.118	8.32716	3.16422	11.3034	-1.84765	0.0362299	1	Gm48194	13	59928876	59929392	-	517	lncRNA	- && - && -	-
ENSMUSG00000078887	7.06658	14	16.7484	30.6856	82.3805	22.8997	12.605	45.322	-1.8515	0.000642054	0.00631586	Gm6710	2	175661012	175673041	+	3440	protein_coding	- && - && -	-
ENSMUSG00000100131	425.761	527.332	758.605	1922.61	1850.89	2406.55	570.566	2060.02	-1.85328	7.53212e-25	1.09065e-20	Gm28439	1	24650616	24651491	-	876	unprocessed_pseudogene	- && P03911.1 RecName: Full=NADH-ubiquinone oxidoreductase chain 4; AltName: Full=NADH dehydrogenase subunit 4 && -	-
ENSMUSG00000079014	5.29993	4.66666	2.95561	10.5813	12.8385	23.9406	4.3074	15.7868	-1.86849	0.0131576	1	Serpina3i	12	104229381	104235631	+	2224	protein_coding	- && - && PF00079:Serpin (serine protease inhibitor)	Serpin
ENSMUSG00000086029	2.64997	3.73333	1.9704	8.465	14.9783	7.28626	2.78457	10.2432	-1.87519	0.0403477	1	Pax6os1	2	105366425	105500675	-	1619	lncRNA	- && Q5R7Y8.3 RecName: Full=60S ribosomal protein L8 && -	-
ENSMUSG00000067736	99.8154	252	198.026	1173.46	517.821	346.618	183.28	679.3	-1.89022	0.00303809	0.0182237	Gm10222	1	24651488	24651781	-	294	unprocessed_pseudogene	- && - && -	-
ENSMUSG00000086862	6.18325	3.73333	1.9704	12.6975	11.7686	20.8179	3.96233	15.0947	-1.91786	0.0134459	1	Gm13546	2	58054013	58067075	+	1349	lncRNA	- && - && -	-
ENSMUSG00000107173	2.64997	3.73333	1.9704	3.17438	16.0482	12.4907	2.78457	10.5711	-1.92157	0.04277	1	Gm43266	5	54075786	54077556	+	1771	TEC	- && - && -	-
ENSMUSG00000099342	5.29993	5.59999	3.94081	11.6394	23.5373	23.9406	4.94691	19.7058	-1.99081	0.00365468	1	Gm18180	1	85942125	85943608	-	1484	processed_pseudogene	- && P15621.3 RecName: Full=Zinc finger protein 44; AltName: Full=Gonadotropin-inducible ovary transcription repressor 2; Short=GIOT-2; AltName: Full=Zinc finger protein 55; AltName: Full=Zinc finger protein 58; AltName: Full=Zinc finger protein KOX7 && -	-
ENSMUSG00000100671	3.53329	3.73333	3.94081	19.0463	19.2578	8.32716	3.73581	15.5437	-2.05723	0.00794251	1	Gm28322	1	50943603	50945077	+	1475	lncRNA	- && - && -	-
ENSMUSG00000027399	3.53329	4.66666	8.86682	10.5813	56.7035	4.16358	5.68892	23.8161	-2.07174	0.0113754	1	Il1a	2	129141530	129151892	-	1974	protein_coding	- && P01582.1 RecName: Full=Interleukin-1 alpha; Short=IL-1 alpha; Flags: Precursor && PF00340:Interleukin-1 / 18|PF02394:Interleukin-1 propeptide	-
ENSMUSG00000114442	0.883322	2.8	1.9704	5.29063	9.6289	9.36805	1.88457	8.09586	-2.11066	0.0463423	1	F630042J09Rik	13	67426641	67431425	+	4397	lncRNA	- && - && -	-
ENSMUSG00000068396	90.0988	77.4665	59.1121	353.414	500.703	167.584	75.5592	340.567	-2.17135	5.87608e-06	0.000310531	Rpl34-ps1	6	71101594	71101947	+	354	processed_pseudogene	- && Q9D1R9.2 RecName: Full=60S ribosomal protein L34 && PF01199:Ribosomal protein L34e	-
ENSMUSG00000095295	8.83322	2.8	1.9704	19.0463	13.9084	31.2268	4.53454	21.3938	-2.22137	0.00213305	1	Gm3488	14	16946846	16968099	-	1945	protein_coding	- && - && PF04822:Takusan	-
ENSMUSG00000022218	3.53329	0.933332	2.95561	2.11625	25.6771	7.28626	2.47407	11.6932	-2.23677	0.0296495	1	Tgm1	14	55937466	55951383	-	3162	protein_coding	- && Q9JLF6.2 RecName: Full=Protein-glutamine gamma-glutamyltransferase K; AltName: Full=Epidermal TGase; AltName: Full=Transglutaminase K; Short=TG(K); Short=TGK; Short=TGase K; AltName: Full=Transglutaminase-1; Short=TGase-1 && PF00868:Transglutaminase family|PF00927:Transglutaminase family, C-terminal ig like domain|PF01841:Transglutaminase-like superfamily	Transglut_core
ENSMUSG00000035373	3.53329	1.86666	1.9704	3.17438	31.0264	1.04089	2.45678	11.7472	-2.24943	0.0425875	1	Ccl7	11	81936538	81938351	+	801	protein_coding	- && - && PF00048:Small cytokines (intecrine/chemokine), interleukin-8 like	-
ENSMUSG00000078897	4.41661	2.8	4.92601	22.2206	14.9783	21.8588	4.04754	19.6859	-2.28415	0.0011629	1	Gm4724	2	175264093	175277600	-	2631	protein_coding	- && Q8BZW4.1 RecName: Full=Zinc finger protein 120; AltName: Full=Zinc finger protein 31; Short=mZF31 && PF00096:Zinc finger, C2H2 type|PF01352:KRAB box	KRAB
ENSMUSG00000071089	0.883322	0.933332	2.95561	9.52313	7.48914	6.24537	1.59075	7.75255	-2.30279	0.0388457	1	Trim75	8	65433536	65440483	-	3486	protein_coding	- && - && PF00643:B-box zinc finger|PF13765:SPRY-associated domain|PF00622:SPRY domain|PF15227:zinc finger of C3HC4-type, RING	SPRY
ENSMUSG00000020542	0	2.8	2.95561	6.34875	8.55902	13.5316	1.91853	9.4798	-2.32582	0.027522	1	Myocd	11	65067387	65160815	-	6424	protein_coding	- && Q8VIM5.2 RecName: Full=Myocardin; AltName: Full=Basic SAP coiled-coil transcription activator 2; AltName: Full=SRF cofactor protein && -	-
ENSMUSG00000072683	0	1.86666	2.95561	8.465	7.48914	9.36805	1.60742	8.44073	-2.41852	0.0295668	1	Gm7457	6	142759957	142779220	+	3950	lncRNA	- && - && -	-
ENSMUSG00000108617	0.883322	1.86666	0.985202	3.17438	7.48914	10.4089	1.24506	7.02415	-2.49804	0.0398753	1	Gm31749	7	126630640	126634463	+	598	lncRNA	- && - && -	-
ENSMUSG00000098164	1.76664	0	1.9704	8.465	6.41926	6.24537	1.24568	7.04321	-2.5014	0.0399725	1	Gm5493	17	22958918	22970482	+	1951	lncRNA	- && Q9NV72.3 RecName: Full=Zinc finger protein 701 && -	-
ENSMUSG00000086801	2.64997	0	0.985202	4.2325	7.48914	9.36805	1.21172	7.0299	-2.51758	0.0431933	1	Gm15943	15	58077871	58187449	+	3821	lncRNA	- && Q8BSF5.1 RecName: Full=Kelch-like protein 38 && PF07707:BTB And C-terminal Kelch|PF00651:BTB/POZ domain	BACK
ENSMUSG00000119862	3.53329	1.86666	0	17.9881	10.6988	5.20447	1.79998	11.2971	-2.62284	0.0114674	1	Gm25328	14	20751591	20751697	+	107	snRNA	- && - && -	-
ENSMUSG00000025081	1.76664	0	1.9704	11.6394	7.48914	4.16358	1.24568	7.76403	-2.64143	0.0287433	1	Tdrd1	19	56814641	56858444	+	5443	protein_coding	- && Q99MV1.2 RecName: Full=Tudor domain-containing protein 1 && PF01753:MYND finger|PF00567:Tudor domain	zf-MYND
ENSMUSG00000059741	1.76664	0.933332	0.985202	17.9881	5.34939	0	1.22839	7.77917	-2.65417	0.0483488	1	Myl3	9	110570929	110598866	+	2044	protein_coding	- && P09542.4 RecName: Full=Myosin light chain 3; AltName: Full=Myosin alkali light chain 1, ventricular/slow skeletal muscle isoform; AltName: Full=Myosin light chain 1, slow-twitch muscle B/ventricular isoform; Short=MLC1SB && -	-
ENSMUSG00000074115	1.76664	2.8	0.985202	2.11625	32.0963	2.08179	1.85061	12.0981	-2.70217	0.0190605	1	Saa1	7	46389921	46392404	-	2478	protein_coding	- && P05366.2 RecName: Full=Serum amyloid A-1 protein; Flags: Precursor && PF00277:Serum amyloid A protein	-
ENSMUSG00000027398	6.18325	0	2.95561	3.17438	50.2842	7.28626	3.04629	20.2483	-2.72146	0.00620758	1	Il1b	2	129206490	129213059	-	1907	protein_coding	- && P10749.1 RecName: Full=Interleukin-1 beta; Short=IL-1 beta; Flags: Precursor && PF00340:Interleukin-1 / 18|PF02394:Interleukin-1 propeptide	-
ENSMUSG00000021622	0	3.73333	0.985202	30.6856	4.27951	2.08179	1.57284	12.349	-2.98039	0.0125059	1	Ckmt2	13	92001506	92025004	-	1486	protein_coding	- && Q6P8J7.1 RecName: Full=Creatine kinase S-type, mitochondrial; AltName: Full=Basic-type mitochondrial creatine kinase; Short=Mib-CK; AltName: Full=Sarcomeric mitochondrial creatine kinase; Short=S-MtCK; Flags: Precursor && PF00217:ATP:guanido phosphotransferase, C-terminal catalytic domain|PF02807:ATP:guanido phosphotransferase, N-terminal domain	-
ENSMUSG00000113106	0	0.933332	1.9704	12.6975	9.6289	2.08179	0.967912	8.13606	-3.10234	0.017649	1	Gm47139	12	99326130	99328287	-	2158	TEC	- && - && -	-
ENSMUSG00000085397	0	0.933332	0.985202	9.52313	1.06988	7.28626	0.639511	5.95976	-3.24686	0.0355566	1	Gm13524	2	32736198	32738180	+	662	lncRNA	- && - && -	-
novel.55	42.3995	30.7999	163.544	33.86	2017.79	302.9	78.9143	784.85	-3.31436	0.0220515	0.0737085	-	13	55332261	55336961	-	4701	-	- && P31792.1 RecName: Full=Pol polyprotein; Contains: RecName: Full=Reverse transcriptase/ribonuclease H; Short=RT; Contains: RecName: Full=Integrase; Short=IN && -	-
ENSMUSG00000022126	0.883322	0	0.985202	1.05813	18.1879	1.04089	0.622841	6.76231	-3.44085	0.0329766	1	Acod1	14	103284413	103294009	+	2623	protein_coding	- && P54987.2 RecName: Full=Cis-aconitate decarboxylase; Short=CAD; AltName: Full=Aconitate decarboxylase; AltName: Full=Aconitate decarboxylase 1; AltName: Full=Cis-aconitic acid decarboxylase; AltName: Full=Immune-responsive gene 1 protein && PF03972:MmgE/PrpD family	-
ENSMUSG00000029380	3.53329	5.59999	26.6004	3.17438	383.016	35.3904	11.9112	140.527	-3.56238	0.0314773	0.0950555	Cxcl1	5	91039100	91040974	+	1875	protein_coding	- && - && -	-
ENSMUSG00000035385	1.76664	1.86666	1.9704	4.2325	75.9613	1.04089	1.8679	27.0782	-3.8579	0.0174065	1	Ccl2	11	81926397	81928279	+	1138	protein_coding	- && - && PF00048:Small cytokines (intecrine/chemokine), interleukin-8 like	-
ENSMUSG00000112637	0	0	0.985202	4.2325	12.8385	1.04089	0.328401	6.03731	-4.17298	0.0148497	1	Gm48225	12	78308067	78313149	+	5083	TEC	- && - && -	-
ENSMUSG00000107123	0	0	0	2.11625	1.06988	6.24537	0	3.14383	-4.19688	0.0427169	1	Vmn2r-ps25	5	151359431	151385330	-	2321	unprocessed_pseudogene	- && E9Q6I0.1 RecName: Full=Vomeronasal type-2 receptor 116; AltName: Full=Vomeronasal type-2 receptor P5; Flags: Precursor && -	-
ENSMUSG00000106815	0	0	0	3.17438	2.13975	4.16358	0	3.15924	-4.20293	0.0373551	1	Gm43658	5	76445447	76449622	-	4176	TEC	- && - && -	-
ENSMUSG00000096035	0	0	0	3.17438	3.20963	3.12268	0	3.1689	-4.20663	0.0362299	1	Odaph	5	92135334	92143179	+	3506	protein_coding	- && Q17RF5.1 RecName: Full=Uncharacterized protein C4orf26; Flags: Precursor && PF15848:Domain of unknown function (DUF4721)	-
ENSMUSG00000086438	0	0	0	5.29063	3.20963	1.04089	0	3.18038	-4.21108	0.039922	1	Asb17os	3	153542539	153558061	-	958	lncRNA	- && - && -	-
ENSMUSG00000114660	0	0	0	5.29063	3.20963	1.04089	0	3.18038	-4.21108	0.039922	1	Gm47881	13	26542937	26544009	-	1073	TEC	- && - && -	-
ENSMUSG00000044083	0	0	0	3.17438	5.34939	1.04089	0	3.18822	-4.21408	0.0396747	1	Efcab8	2	153621851	153686671	+	5693	protein_coding	- && Q8C9R9.1 RecName: Full=EF-hand calcium-binding domain-containing protein 8 && -	-
ENSMUSG00000092921	0	0	0	1.05813	5.34939	4.16358	0	3.5237	-4.35957	0.0281858	1	Mir344b	7	61440267	61440329	-	63	miRNA	- && - && -	-
ENSMUSG00000026981	0.883322	0.933332	0.985202	5.29063	50.2842	2.08179	0.933952	19.2189	-4.36346	0.000382766	1	Il1rn	2	24226865	24241506	+	5535	protein_coding	- && P25085.1 RecName: Full=Interleukin-1 receptor antagonist protein; Short=IL-1RN; Short=IL-1ra; Short=IRAP; AltName: Full=IL1 inhibitor; Flags: Precursor && PF00340:Interleukin-1 / 18	-
ENSMUSG00000012350	0	0	0	0	8.55902	3.12268	0	3.8939	-4.50293	0.0299126	1	Ehf	2	103093778	103133623	-	5576	protein_coding	- && - && PF00178:Ets-domain|PF02198:Sterile alpha motif (SAM)/Pointed domain	Ets
ENSMUSG00000097870	0	0	0	2.11625	8.55902	1.04089	0	3.90539	-4.50644	0.0218028	1	Gm26868	9	56513977	56521757	+	2655	lncRNA	- && - && -	-
ENSMUSG00000118738	0	0	0	3.17438	4.27951	5.20447	0	4.21945	-4.62002	0.0122078	1	Gm26243	10	79821340	79821446	+	107	snRNA	- && - && -	-
ENSMUSG00000110368	0	0	0	9.52313	2.13975	2.08179	0	4.58156	-4.73832	0.0107469	1	Gm45518	8	65154141	65164110	-	2583	lncRNA	- && P11260.2 RecName: Full=LINE-1 retrotransposable element ORF1 protein; Short=L1ORF1p; AltName: Full=LINE retrotransposable element 1; AltName: Full=LINE1 retrotransposable element 1; AltName: Full=Transposase element L1Md-A101/L1Md-A102/L1Md-A2 && -	-
ENSMUSG00000115837	0	0	0	1.05813	7.48914	6.24537	0	4.93088	-4.84443	0.00781552	1	9130002K18Rik	15	35787300	35790425	+	3126	TEC	- && - && -	-
Significantly up or down-regulated DEGs between OXL+GeXIVA and OXL+NS group, values of gene expression were illustrated as normalized read count

## Sheet: OXLNS_GSNSvsOXLGE_OXLNS
gene_id	gene_name	OXL_NS vs GS_NS	OXL_GeXIVA vs OXL_NS	gene_description	GS_NS_1_fpkm	GS_NS_2_fpkm	GS_NS_3_fpkm	GS_GeXIVA_1_fpkm	GS_GeXIVA_2_fpkm	GS_GeXIVA_3_fpkm	OXL_GeXIVA_1_fpkm	OXL_GeXIVA_2_fpkm	OXL_GeXIVA_3_fpkm	OXL_NS_1_fpkm	OXL_NS_2_fpkm	OXL_NS_3_fpkm
ENSMUSG00000004885	Crabp2	down	up	- && P22935.2 RecName: Full=Cellular retinoic acid-binding protein 2; AltName: Full=Cellular retinoic acid-binding protein II; Short=CRABP-II && PF00061:Lipocalin / cytosolic fatty-acid binding protein family	0.660969	0.233433	0.969594	1.57772	1.75944	1.5865	1.37048	0.874049	0.175745	0.141379	0.0955843	0.0463196
ENSMUSG00000006574	Slc4a1	down	up	- && P04919.1 RecName: Full=Band 3 anion transport protein; AltName: Full=Anion exchange protein 1; Short=AE 1; Short=Anion exchanger 1; AltName: Full=MEB3; AltName: Full=Solute carrier family 4 member 1; AltName: CD_antigen=CD233 && PF00955:HCO3- transporter family|PF07565:Band 3 cytoplasmic domain	0.368476	0.0378571	0.137277	0.509364	0.226459	0.385938	0.0423349	0.0674997	0.0237513	0	0	0
ENSMUSG00000018168	Ikzf3	down	up	- && - && PF00096:Zinc finger, C2H2 type	0.0249543	0.0352522	0.0209178	0.0264735	0.0379579	0.0359383	0.0354798	0.0188566	0.0132702	0	0	0
ENSMUSG00000021622	Ckmt2	up	down	- && Q6P8J7.1 RecName: Full=Creatine kinase S-type, mitochondrial; AltName: Full=Basic-type mitochondrial creatine kinase; Short=Mib-CK; AltName: Full=Sarcomeric mitochondrial creatine kinase; Short=S-MtCK; Flags: Precursor && PF00217:ATP:guanido phosphotransferase, C-terminal catalytic domain|PF02807:ATP:guanido phosphotransferase, N-terminal domain	0.110254	0.0415341	0.0410755	0.116966	0	0.846847	0	0.148112	0.0390874	1.21584	0.170071	0.0824152
ENSMUSG00000021922	Itih4	up	down	- && A6X935.2 RecName: Full=Inter alpha-trypsin inhibitor, heavy chain 4; Short=ITI heavy chain H4; Short=ITI-HC4; Short=Inter-alpha-inhibitor heavy chain 4; Flags: Precursor && PF00092:von Willebrand factor type A domain|PF06668:Inter-alpha-trypsin inhibitor heavy chain C-terminus|PF08487:Vault protein inter-alpha-trypsin domain	0.0296003	0.0167262	0	0.0314023	0.0150083	0	0.126256	0.19385	0.283336	0.303908	0.907481	0.597409
ENSMUSG00000022595	Lypd2	down	up	- && - && PF00021:u-PAR/Ly-6 domain	0.965171	0.727183	1.43831	1.79187	2.3653	1.31278	1.37227	0.972432	0.940975	0.275263	0.279151	0.27055
ENSMUSG00000022651	Retnlg	down	up	- && Q9EP95.1 RecName: Full=Resistin-like alpha; AltName: Full=Cysteine-rich secreted protein A12-gamma; AltName: Full=Cysteine-rich secreted protein FIZZ1; AltName: Full=Hypoxia-induced mitogenic factor; AltName: Full=Parasite-induced macrophage novel gene 1 protein; AltName: Full=RELMalpha; Flags: Precursor && PF06954:Resistin	2.48658	1.24896	1.13224	1.17242	1.49425	2.4758	2.53151	0.742306	0.489746	0.105061	0.319635	0.103262
ENSMUSG00000023046	Igfbp6	down	up	- && P47880.2 RecName: Full=Insulin-like growth factor-binding protein 6; Short=IBP-6; Short=IGF-binding protein 6; Short=IGFBP-6; Flags: Precursor && PF00086:Thyroglobulin type-1 repeat|PF00219:Insulin-like growth factor binding protein	15.1756	9.65757	22.9442	44.7554	28.7361	29.1876	27.8377	25.5325	22.8783	8.90817	7.44312	6.55297
ENSMUSG00000023886	Smoc2	down	up	- && Q8CD91.1 RecName: Full=SPARC-related modular calcium-binding protein 2; AltName: Full=Secreted modular calcium-binding protein 2; Short=SMOC-2; Flags: Precursor && PF07648:Kazal-type serine protease inhibitor domain|PF10591:Secreted protein acidic and rich in cysteine Ca binding region|PF16597:Thyroglobulin_1 repeat associated disordered domain|PF00086:Thyroglobulin type-1 repeat	2.33347	1.08327	2.74852	3.67577	2.44595	2.21775	2.38308	2.76265	1.58767	1.2817	0.990758	0.616661
ENSMUSG00000024610	Cd74	down	up	- && P04441.3 RecName: Full=H-2 class II histocompatibility antigen gamma chain; AltName: Full=Ia antigen-associated invariant chain; Short=Ii; AltName: Full=MHC class II-associated invariant chain; AltName: CD_antigen=CD74 && PF08831:Class II MHC-associated invariant chain trimerisation domain|PF09307:CLIP, MHC2 interacting	12.3277	6.3962	13.3782	26.5359	16.8879	16.895	13.9355	12.5515	7.54156	5.12065	1.99441	6.05415
ENSMUSG00000024650	Slc22a6	down	up	- && - && PF00083:Sugar (and other) transporter	0.137114	0.0929746	0.49039	0.174553	0.152947	0.394933	0.246933	0.17959	0.160412	0.0469253	0.0158627	0.0922437
ENSMUSG00000025044	Msr1	up	down	- && P30204.3 RecName: Full=Macrophage scavenger receptor types I and II; AltName: Full=Macrophage acetylated LDL receptor I and II; AltName: Full=Scavenger receptor type A; Short=SR-A; AltName: CD_antigen=CD204 && PF03523:Macrophage scavenger receptor|PF01391:Collagen triple helix repeat (20 copies)|PF00530:Scavenger receptor cysteine-rich domain	0.12052	0.184848	0.0673499	0.118724	0.122214	0.107447	0.138715	0.0520398	0.137336	0.137487	0.746941	0.12548
ENSMUSG00000026068	Il18rap	up	down	- && - && -	0.0404418	0.0457047	0.0271201	0.034323	0	0.00776569	0.0229999	0.0325968	0.0516148	0.0553624	0.196506	0.108829
ENSMUSG00000026981	Il1rn	up	down	- && P25085.1 RecName: Full=Interleukin-1 receptor antagonist protein; Short=IL-1RN; Short=IL-1ra; Short=IRAP; AltName: Full=IL1 inhibitor; Flags: Precursor && PF00340:Interleukin-1 / 18	0.0592006	0.0223016	0	0.0209349	0.020011	0.0189463	0.00935231	0.00994101	0.0104939	0.0562793	0.536498	0.0221263
ENSMUSG00000027398	Il1b	up	down	- && P10749.1 RecName: Full=Interleukin-1 beta; Short=IL-1 beta; Flags: Precursor && PF00340:Interleukin-1 / 18|PF02394:Interleukin-1 propeptide	0.0859139	0.0647296	0	0.0303813	0.0290407	0.164973	0.190013	0	0.0913747	0.0980092	1.55717	0.224773
ENSMUSG00000027399	Il1a	up	down	- && P01582.1 RecName: Full=Interleukin-1 alpha; Short=IL-1 alpha; Flags: Precursor && PF00340:Interleukin-1 / 18|PF02394:Interleukin-1 propeptide	0.248994	0.281396	0.0927633	0.117401	0.084165	0.0796868	0.104894	0.13937	0.26482	0.315609	1.69636	0.124082
ENSMUSG00000028362	Tnfsf8	up	down	- && - && PF00229:TNF(Tumour Necrosis Factor) family	0.143453	0.0810607	0.0480995	0.167405	0.0290941	0.123957	0.149571	0.404691	0.503485	0.278203	1.59322	0.723812
ENSMUSG00000029380	Cxcl1	up	down	- && - && -	0	0.131669	0	0.0617997	0.0590726	0	0.110432	0.176075	0.836407	0.0996819	12.0634	1.11038
ENSMUSG00000031304	Il2rg	up	down	- && - && PF00041:Fibronectin type III domain|PF09240:Interleukin-6 receptor alpha chain, binding	0.366067	0.206853	0.0767133	0.266992	0.208808	0.219665	0.390352	0.414924	0.389334	0.574205	1.29698	0.61568
ENSMUSG00000032484	Ngp	down	up	- && O08692.1 RecName: Full=Neutrophilic granule protein; Short=NGP; AltName: Full=Cystatin-like protein; AltName: Full=Myeloid bactenecin protein; AltName: Full=Myeloid secondary granule protein; Flags: Precursor && PF00666:Cathelicidin	8.71477	2.22231	3.49646	4.64636	6.97922	4.33374	2.96526	0.540329	0.285191	0.101966	0.413625	0.55121
ENSMUSG00000032496	Ltf	down	up	- && - && PF00405:Transferrin	1.80459	0.375685	0.583844	1.15874	1.13972	0.638326	0.735213	0.175437	0.134687	0.0722333	0.0549402	0.106495
ENSMUSG00000033227	Wnt6	down	up	- && P22727.2 RecName: Full=Protein Wnt-6; Flags: Precursor && PF00110:wnt family	1.49487	0.366038	1.92137	4.46687	2.27384	2.60734	2.9047	1.65673	1.90786	0.653708	0.374706	0.502838
ENSMUSG00000035385	Ccl2	up	down	- && - && PF00048:Small cytokines (intecrine/chemokine), interleukin-8 like	0.0959799	0.162706	0.160909	0.0509114	0.145994	0.276453	0.0909754	0.0967021	0.102081	0.218985	3.94189	0.0538088
ENSMUSG00000038357	Camp	down	up	- && P51437.2 RecName: Full=Cathelicidin antimicrobial peptide; AltName: Full=Cathelin-like protein; Short=CLP; Contains: RecName: Full=Cathelin-related antimicrobial peptide; Short=Cramp; Flags: Precursor && PF00666:Cathelicidin|PF12153:LPS binding domain of CAP18 (C terminal)	2.66579	0.977092	0.644203	2.29303	4.45675	2.21357	1.36583	0.653313	0.0766277	0.0821915	0.0833526	0.242353
ENSMUSG00000044034	Npb	down	up	- && Q8K4P1.1 RecName: Full=Neuropeptide B; AltName: Full=Preproprotein L7; Short=mPPL7; Contains: RecName: Full=Neuropeptide B-29; Short=NPB29; AltName: Full=L7C; Flags: Precursor && PF15180:Neuropeptides B and W	2.21675	3.75784	4.7299	4.91718	5.00673	5.32079	6.20798	3.85773	4.0723	1.60926	1.51542	2.03362
ENSMUSG00000046714	Foxc2	down	up	- && - && PF00250:Forkhead domain	0.861777	0.452988	1.34396	1.70091	1.321	0.962091	1.40573	0.928837	0.532879	0.571571	0.185486	0.404485
ENSMUSG00000056071	S100a9	down	up	- && P31725.3 RecName: Full=Protein S100-A9; AltName: Full=Calgranulin-B; AltName: Full=Leukocyte L1 complex heavy chain; AltName: Full=Migration inhibitory factor-related protein 14; Short=MRP-14; Short=p14; AltName: Full=S100 calcium-binding protein A9 && PF01023:S-100/ICaBP type calcium binding domain	29.2941	6.7395	13.2133	18.4245	21.9612	13.3596	12.7925	2.21359	2.00289	1.79026	2.90489	2.93268
ENSMUSG00000059089	Fcgr4	up	down	- && - && PF13895:Immunoglobulin domain	0.217407	0.196559	0.0485973	0.507412	0.30865	0.417468	0.535784	0.438085	0.693676	0.545631	1.4085	2.04765
ENSMUSG00000059741	Myl3	up	down	- && P09542.4 RecName: Full=Myosin light chain 3; AltName: Full=Myosin alkali light chain 1, ventricular/slow skeletal muscle isoform; AltName: Full=Myosin light chain 1, slow-twitch muscle B/ventricular isoform; Short=MLC1SB && -	0.0267185	0	0	0.085035	0.0270942	0.10261	0.0506507	0.0269195	0.0284167	0.518161	0.154553	0
ENSMUSG00000060586	H2-Eb1	down	up	- && P04230.1 RecName: Full=H-2 class II histocompatibility antigen, E-B beta chain; Flags: Precursor && -	4.71961	1.84143	3.6736	8.76211	6.49525	5.96085	3.75456	2.85873	3.55554	1.63444	1.07252	1.57496
ENSMUSG00000066363	Serpina3f	up	down	- && Q80X76.3 RecName: Full=Serine protease inhibitor A3F; Short=Serpin A3F && PF00079:Serpin (serine protease inhibitor)	0	0	0	0.0253001	0	0.0228969	0.248653	0.288333	0.710195	0.163235	0.910472	1.89854
ENSMUSG00000068396	Rpl34-ps1	down	up	- && Q9D1R9.2 RecName: Full=60S ribosomal protein L34 && PF01199:Ribosomal protein L34e	14.0388	9.24051	11.5524	13.7478	24.405	25.3283	14.9153	12.901	9.84472	58.7814	83.5278	27.8496
ENSMUSG00000069917	Hba-a2	down	up	- && P01942.2 RecName: Full=Hemoglobin subunit alpha; AltName: Full=Alpha-globin; AltName: Full=Hemoglobin alpha chain && PF00042:Globin	9.08845	8.23545	16.106	34.3106	22.5009	21.9326	3.49239	0.577458	0.522493	0.0934051	0.0947245	0.367223
ENSMUSG00000071497	Nutf2-ps1	down	up	- && - && PF02136:Nuclear transport factor 2 (NTF2) domain	2.30331	2.60305	2.43882	4.82274	6.2695	4.53923	4.25151	2.80919	2.51417	0.898907	1.05185	1.49518
ENSMUSG00000073940	Hbb-bt	down	up	- && P02088.2 RecName: Full=Hemoglobin subunit beta-1; AltName: Full=Beta-1-globin; AltName: Full=Hemoglobin beta-1 chain; AltName: Full=Hemoglobin beta-major chain && PF00042:Globin	19.8874	16.3298	28.9997	59.8327	43.879	47.9588	5.08078	1.48712	0.247868	0	0	0
ENSMUSG00000075268	Gm10819	down	up	- && P70296.3 RecName: Full=Phosphatidylethanolamine-binding protein 1; Short=PEBP-1; AltName: Full=HCNPpp; Contains: RecName: Full=Hippocampal cholinergic neurostimulating peptide; Short=HCNP && PF01161:Phosphatidylethanolamine-binding protein	5.84092	7.26113	10.1186	7.74562	11.3525	10.3746	9.96546	8.33689	4.76267	3.33161	2.25245	5.45762
ENSMUSG00000075589	Gm11536	down	up	- && - && -	3.9811	2.65337	4.6777	3.79028	4.34763	2.6462	5.51515	3.49682	3.58274	2.21257	1.53525	1.6024
ENSMUSG00000078302	Foxd1	down	up	- && Q61345.2 RecName: Full=Forkhead box protein D1; AltName: Full=Brain factor 2; Short=BF-2; AltName: Full=Forkhead-related protein FKHL8; AltName: Full=Forkhead-related transcription factor 4; Short=FREAC-4; AltName: Full=HFH-BF-2 && -	0.539224	0.219383	0.530348	0.720783	0.513998	0.621255	0.500886	0.44549	0.321159	0.147633	0.224578	0.217658
ENSMUSG00000079014	Serpina3i	up	down	- && - && PF00079:Serpin (serine protease inhibitor)	0.049112	0.0832549	0.0823358	0.182356	0.498026	0.0235764	0.139654	0.123704	0.0783505	0.280131	0.340906	0.63327
ENSMUSG00000079402	Gm3020	down	up	- && - && -	0.734572	1.56454	0.0947309	0	0.1146	0.18988	0.0267796	1.22401	0.0300485	0.0966909	0.0653712	0.0950354
ENSMUSG00000086029	Pax6os1	up	down	- && Q5R7Y8.3 RecName: Full=60S ribosomal protein L8 && -	0.134929	0.0381221	0.113104	0.143143	0.0684133	0.356253	0.0959204	0.135944	0.0717527	0.30785	0.546348	0.264757
ENSMUSG00000087038	2900079G21Rik	down	up	- && - && -	0.170715	0.16537	0.17263	0.20698	0.255552	0.304395	0.285101	0.204761	0.095106	0.0370951	0.0846429	0.0546899
ENSMUSG00000090164	BC035044	up	down	- && - && -	0.344776	0.311715	0.308274	0.182883	0.804137	0.430329	0.424839	0.208422	0.220015	0.786631	0.757856	0.927795
ENSMUSG00000094066	Fam205a2	down	up	- && - && PF14650:FAM75 family|PF15371:Domain of unknown function (DUF4599)	0.292046	0.330051	0.326408	0.383592	0.11282	0.160226	0.105455	0.140116	0.369772	0.0475945	0	0.0467796
ENSMUSG00000095675	Ccl21b	down	up	- && - && PF00048:Small cytokines (intecrine/chemokine), interleukin-8 like	0.628453	0.142047	0	0	0	0.0603383	0.357411	0.0633181	0.735238	0	0	0
ENSMUSG00000106815	Gm43658	up	down	- && - && -	0	0	0	0	0	0	0	0	0	0.0447566	0.0302592	0.0586537
ENSMUSG00000109724	Gm18194	up	down	- && - && -	0.761593	0.215176	0.177334	0.134659	0.547048	0.594109	0.436138	0.35169	0.286875	0.941215	0.899443	1.17416
ENSMUSG00000110279	Gm45552	down	up	- && - && -	2.10588	3.17325	1.96138	3.05325	3.77271	3.43719	2.26222	2.54607	2.76234	1.36134	0.649679	1.41674
ENSMUSG00000117442	1810073O08Rik	up	down	- && - && -	0.147363	0.0333079	0.131761	0	0.179322	0.0565936	0.223486	0.20786	0.282112	0.235353	1.70484	0.4296
ENSMUSG00000118426	Gm2102	down	up	- && - && PF14634:zinc-RING finger domain	0.952971	0.497071	0.573514	0.699913	2.37876	2.95601	0.972765	0.443142	0.389824	0.0836258	0.169614	0.0821939
ENSMUSG00000118738	Gm26243	up	down	- && - && -	0.510398	0	0	1.08294	0	0.490037	0	0	0	1.74676	2.36192	2.86142
ENSMUSG00002076161	7SK	up	up	- && - && -	1.31994	2.6105	5.16336	4.726	16.3967	9.34623	22.9893	13.1325	10.8798	5.64663	7.6352	9.43492
novel.55	-	up	down	- && P31792.1 RecName: Full=Pol polyprotein; Contains: RecName: Full=Reverse transcriptase/ribonuclease H; Short=RT; Contains: RecName: Full=Integrase; Short=IN && -	0.522775	0.262581	0.519364	0.382058	0.235612	0.50192	0.528552	0.386253	2.05104	0.424088	25.3478	3.79052
FPKM of 53 overlapped DEGs between OXL+NS vs GS+NS and OXL+GeXIVA vs OXL+NS comparison
